## Deaths from COPD in patients with cancer: a population-based study

Yongqiang Zheng<sup>1,2,\*</sup>, Yan Huang<sup>3,\*</sup>, Xiwen Zheng<sup>4,\*</sup>, Jiangtong Peng<sup>1</sup>, Ying Chen<sup>5</sup>, Kaixu Yu<sup>6</sup>, Yun Yang<sup>1</sup>, Xi Wang<sup>1</sup>, Xue Yang<sup>1</sup>, Jiaxin Qian<sup>1</sup>, Xindi Wang<sup>1</sup>, Xiaolan Gao<sup>1</sup>, Bian Wu<sup>1</sup>

<sup>1</sup>Cancer Center, Union Hospital, Tongji Medical College, Huazhong University of Science and Technology, Wuhan 430022, China

<sup>2</sup>State Key Laboratory of Oncology in South China, Sun Yat-sen University Cancer Center, Sun Yat-sen University, Guangzhou 510060, China

<sup>3</sup>Department of Emergency Surgery, Union Hospital, Tongji Medical College, Huazhong University of Science and Technology, Wuhan 430022, China

<sup>4</sup>Department of Clinical Medicine, Fujian Medical University, Fuzhou 350000, China

<sup>5</sup>Department of Obstetrics and Gynecology, Tongji Hospital, Tongji Medical College, Huazhong University of Science and Technology, Wuhan 430022, China

<sup>6</sup>Department of Orthopedics, Tongji Hospital, Tongji Medical College, Huazhong University of Science and Technology, Wuhan 430022, China

\*Co-first authors

**Correspondence to:** Bian Wu; email: [bianwu@hust.edu.cn](mailto:bianwu@hust.edu.cn)

**Keywords:** cancer survivors, chronic obstructive pulmonary disease, mortality, surveillance, epidemiology, end results program

**Received:** October 3, 2020

**Accepted:** March 31, 2021

**Published:** April 27, 2021

**Copyright:** © 2021 Zheng et al. This is an open access article distributed under the terms of the [Creative Commons Attribution License](https://creativecommons.org/licenses/by/3.0/) (CC BY 3.0), which permits unrestricted use, distribution, and reproduction in any medium, provided the original author and source are credited.

### ABSTRACT

Features of the deaths caused by COPD (chronic obstructive pulmonary disease) in cancer patients remained a controversial issue. This study aimed to characterize the demographic characteristics and mortality rates of the deaths from COPD in patients with cancer. In total, 7,846,370 cancer patients aged 40 years or older in the United States were identified from the Surveillance, Epidemiology, and End Results database (1975–2016). Mortality rates and SMRs (standardized mortality ratios) adjusted by age, race, sex, and calendar year were calculated to investigate the risk of COPD deaths in cancer survivors and to compare it with the general population. A total of 119,228 COPD deaths in patients with cancer were recorded, with a mortality rate of 261.5/100,000 person-years, nearly two-fold that of the general population (SMR, 2.17; 95% CI [confidence interval], 2.16–2.18). The proportion of cancer survivors dying from COPD increased from 0.9% in 1975 to 3.4% in 2016. Patients with lung cancer had a higher overall risk (SMR, 9.23; 95% CI, 9.12–9.35) than those with extrapulmonary malignancies. Among all extrapulmonary sites, laryngeal (SMR, 5.54; 95% CI, 5.34–5.75) and esophageal cancers (SMR, 4.33; 95% CI, 4.04–4.63) had the highest SMR. The risk of death from COPD increased with follow-up time.

### INTRODUCTION

Cancer and COPD (chronic obstructive pulmonary disease) are both leading causes of death in the USA and worldwide [1, 2]. In the USA, 595,930 deaths were due to cancer, and 155,041 deaths were due to COPD in

2015 [1]. Worldwide, 8.8 million deaths were due to cancer [3], and 3.2 million deaths were due to COPD in 2015 [4].

COPD and lung cancer have been proved to be closely related diseases. COPD is an independent risk factor

and sometimes could be the driving factor for lung cancer, particularly for squamous cell cancer [5]. The high prevalence of lung cancer in COPD was interpreted as the common mechanism between these two closely related diseases, such as premature aging in the lungs, genetic predispositions to either disease or common pathogenic factors, such as growth factors, activation of intracellular pathways, or epigenetics [5]. The relationship between COPD and extrapulmonary cancers has not been well investigated, but the epidemiological studies showed that the risks of developing extrapulmonary cancers were increasing than those without [6]. In contrast, an increased risk of COPD has also been found in patients with cancer [7].

Similar risk factors are shared between cancer and COPD, such as age and smoking. As aging populations increase, older adults increase in number and make up a growing proportion of the population in nearly all countries [8]. Most of the new cancer cases were diagnosed among the elderly, and it is predicted that the number of incident cancers in the elderly will double in 2035 compared with 2012 [9]. Given the progressive decline in pulmonary function with increasing age and structural/morphological alveolar changes in the elderly [10, 11], COPD is also prevalent in the elderly population [12]. The aging of the population will increase the number of patients with cancer and COPD. It has been well known for many years that smoking causes COPD [13]. Tobacco smoke is a complex mixture with many types of carcinogens [14], associated with at least 17 types of human cancer, including lung, laryngeal, and pharyngeal cancers [15]. With shared risk factors, cancer and COPD might occur in the same individual, leading to a challenging, complicated condition for both clinic physicians and researchers. Besides, as the aging population increases, this particular population with cancer and COPD will rise. As the survival rates of patients with cancer continue to increase, the estimated number of cancer survivors in 2030 is expected to reach 22.1 million in the USA, and the majority of these are elderly patients [16]. The burden of COPD is likely to increase among cancer survivors, and respiratory care provision is of particular importance in this patient group [17].

Given that COPD is a significant cause of death in the aging population, the population with cancer will not be an exception. However, the studies describing COPD's characteristics and mortality in patients with cancer are lacking. Another aspect of the optimal management of cancer survivors is cancer-specific follow-up care [18], which requires a multidisciplinary care team, including specialists (such as oncologists or pulmonologists) and PCPs (primary care physicians) [19]. In this team, PCPs are mainly responsible for primary prevention, while

pulmonologists provide COPD management. Therefore, identifying and targeting sub-populations of cancer survivors with the highest risk of COPD mortality is crucial. While few achievements have been made in the overlapping fields of COPD and cancer care, there is currently no contemporary resource that can assist specialists and policymakers in creating cancer survivorship programs to mitigate COPD's mortality risk.

In this study, we conducted a comprehensive analysis of the landscape of COPD mortality in cancer survivors. We aimed to characterize the characteristics and incidence of COPD mortality in patients with cancer. Our work provides a contemporary resource for oncologists, pulmonologists, and PCPs, as we highlight both cancer types and basic clinical characteristics, which together may influence patient-level decisions regarding respiratory care.

## RESULTS

### Objective 1: COPD deaths by demographic characteristics

A total of 7,846,370 patients diagnosed with a first primary cancer between 1975 and 2016 were included in this study, with a median follow-up time of 3.5 years (range: 0–41.9 years) (Figure 1). COPD was the second leading cause of death among all non-cancer causes (Supplementary Tables 1 and 2), accounting for 119,228 deaths during the follow-up period (Table 1). The COPD mortality rate in patients with cancer was 261.5 per 100,000 person-years. The corresponding age-, sex-, race-, and calendar-year-adjusted COPD mortality rate in the general population was 120.5 per 100,000 person-years. This yielded an SMR (standardized mortality rate) of 2.17 (95% CI [confidence interval], 2.16–2.18). As expected, the proportion of cancer-related deaths for all patients with cancer declined over time (Figure 2). In contrast, the percentage of patients with cancer dying from COPD increased steadily over time. The proportion of cancer survivors dying from COPD increased from 0.9% in 1975 to 3.4% in 2016. This increase was more pronounced in patients with lung cancer in recent years (2005–2015) (Figure 2).

Patients with cancer diagnosed at nearly all ages (all sites) had an increased risk of death due to COPD compared with the general population with the same age distribution in the USA (Figure 3A and Supplementary Figure 1). Patients aged 40–45 years had the highest risk of death from COPD than the general population (SMR, 10.84; 95% CI, 10.12–11.61) (Figure 3A and Supplementary Figure 1). The risk of death due to COPD in cancer survivors (all sites) gradually

decreased as age at cancer diagnosis increased, and this trend was observed for both lung and extrapulmonary cancers (Figure 3A and Supplementary Figure 1). This was due to the increased risk of COPD death with increasing age in the general population. SMRs for risk of COPD death by age at cancer diagnosis for all sites are presented in Supplementary Figure 1.

Higher SMRs among patients with cancer were observed in female, black, and unmarried patients. The risk of COPD mortality was the highest in patients diagnosed between 1975 and 1989 and declined gradually thereafter. Patients living in the census tracts with a lower socioeconomic status (SES) level and a higher smoking prevalence were more likely to die from COPD (SMR, 2.32 and 2.27, respectively).

### Objective 2: COPD deaths by cancer type and stage

Most COPD deaths occurred in patients with lung, prostate, breast, colorectal, and bladder cancers, accounting for 70.0% of total deaths (Figure 4A). Compared with the general population with a similar demographic distribution, patients with lung cancer had the highest risk of dying from COPD, with an SMR of 9.23 (95% CI, 9.12–9.35), followed by those with laryngeal cancer (SMR, 5.54; 95% CI, 5.34–5.75), esophageal cancer (SMR, 4.33; 95% CI, 4.04–4.63), cervical cancer (SMR, 4.07; 95% CI, 4.06–4.40), vulva

cancer (SMR, 3.61; 95% CI, 3.37–3.86), and cancers of the oral cavity and pharynx (SMR, 3.51; 95% CI, 3.40–3.63) (Figure 4B).

Analyses stratified by histology for lung cancer revealed that adenocarcinoma was associated with the lowest risk among all histological types, with an SMR of 5.72 (95% CI, 5.58–5.87). Tumor in the main bronchus was associated with the highest risk compared with other anatomic sites in the lung, with an SMR of 13.5 (95% CI, 12.6–14.4) (Table 2).

Deaths due to COPD were most commonly observed in patients with localized cancer (47.0%). Although there were only 10,987 (9.2%) patients with advanced disease, these patients had the highest risk of COPD mortality (SMR, 3.16; 95% CI, 3.10–3.22) (Table 3).

### Objective 3: COPD deaths during follow-up

For patients with a short-term cancer diagnosis, COPD deaths were more likely to occur in those with lung cancer, with nearly 40% of all COPD deaths occurring in patients with lung cancer within the first year after a cancer diagnosis. In long-term cancer survivors, deaths due to COPD were more likely to occur in patients with prostate cancer and breast cancer (nearly 35% of all COPD deaths in patients surviving more than 5 years) (Supplementary Figure 2).

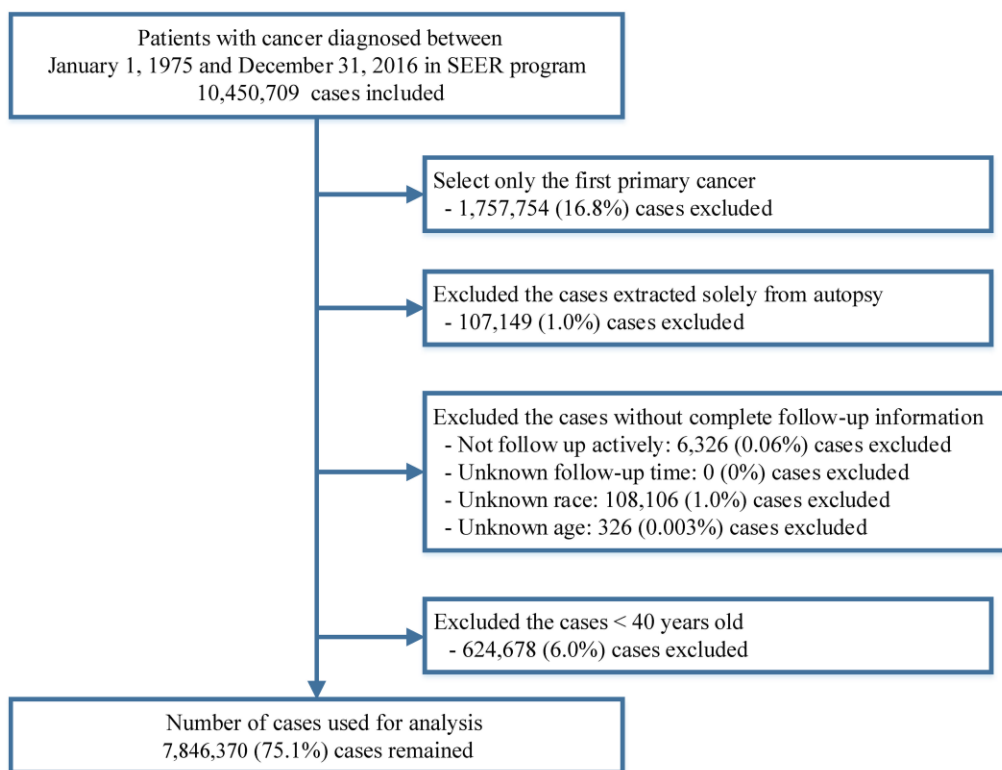

Figure 1. Flow chart of inclusion and exclusion criteria for cases included in this study.

**Table 1. COPD mortality among patients diagnosed with cancer between 1975 and 2016 in SEER 18 registries by baseline characteristics.**

| Characteristics | No. of patients with cancer (%) | Person-years of follow-up | Death from COPD                 |           |                                 |           | SMR* (95% CI)     |
|-----------------|---------------------------------|---------------------------|---------------------------------|-----------|---------------------------------|-----------|-------------------|
|                 |                                 |                           | Patients with cancer            |           | General population              |           |                   |
|                 |                                 |                           | No. of observed COPD deaths (%) | Mortality | No. of Expected COPD deaths (%) | Mortality |                   |
| All             | 7,846,370 (100%)                | 45,601,152                | 119,228 (100%)                  | 261.5     | 54,955                          | 120.5     | 2.17 (2.16–2.18)  |
| Age             |                                 |                           |                                 |           |                                 |           |                   |
| 40–59           | 2,519,598 (32.1%)               | 19,189,793                | 14,459 (12.1%)                  | 75.3      | 2,795                           | 14.6      | 5.17 (5.09–5.26)  |
| 60–79           | 4,165,541 (53.1%)               | 23,176,048                | 79,553 (66.7%)                  | 343.3     | 35,821                          | 154.6     | 2.22 (2.21–2.24)  |
| 80+             | 1,161,231 (14.8%)               | 3,235,312                 | 25,216 (21.1%)                  | 779.4     | 16,339                          | 505.0     | 1.54 (1.52–1.56)  |
| Sex             |                                 |                           |                                 |           |                                 |           |                   |
| Female          | 3,899,940 (49.7%)               | 24,323,346                | 51,969 (43.6%)                  | 213.7     | 21,463                          | 88.2      | 2.420 (2.40–2.44) |
| Male            | 3,946,430 (50.3%)               | 21,277,807                | 67,259 (56.4%)                  | 316.1     | 33,492                          | 157.4     | 2.01 (1.99–2.02)  |
| Race            |                                 |                           |                                 |           |                                 |           |                   |
| White           | 6,531,177 (83.2%)               | 38,835,087                | 108,069 (90.6%)                 | 278.3     | 50,481                          | 130.0     | 2.14 (2.13–2.15)  |
| Black           | 795,400 (10.1%)                 | 3,889,420                 | 7,426 (6.2%)                    | 190.9     | 3,085                           | 79.3      | 2.41 (2.35–2.46)  |
| Other           | 519,793 (6.6%)                  | 2,876,646                 | 3,733 (3.1%)                    | 129.8     | 1,389                           | 48.3      | 2.69 (2.60–2.78)  |
| Year            |                                 |                           |                                 |           |                                 |           |                   |
| 1975–1989       | 1,015,383 (12.9%)               | 8,110,919                 | 23,883 (20.0%)                  | 294.5     | 7,218                           | 89.0      | 3.31 (3.27–3.35)  |
| 1990–1999       | 1,213,899 (15.5%)               | 10,580,651                | 29,878 (25.1%)                  | 282.4     | 12,979                          | 122.7     | 2.30 (2.28–2.33)  |
| 2000–2009       | 3,181,105 (40.5%)               | 21,014,768                | 51,214 (43.0%)                  | 243.7     | 26,925                          | 128.1     | 1.90 (1.89–1.92)  |
| 2010–2016       | 2,435,983 (31.0%)               | 5,894,814                 | 14,253 (12.0%)                  | 241.8     | 7,833                           | 132.9     | 1.82 (1.79–1.85)  |
| Marital status  |                                 |                           |                                 |           |                                 |           |                   |
| Married         | 4,428,425 (56.4%)               | 28,888,368                | 60,504 (50.7%)                  | 209.4     | 32,318                          | 111.9     | 1.87 (1.86–1.89)  |
| Unmarried       | 2,862,961 (36.5%)               | 13,449,450                | 50,655 (42.5%)                  | 376.6     | 18,097                          | 134.6     | 2.80 (2.77–2.82)  |
| Unknown         | 554,984 (7.1%)                  | 3,263,335                 | 8,069 (6.8%)                    | 247.3     | 4,540                           | 139.1     | 1.78 (1.74–1.82)  |
| Stage           |                                 |                           |                                 |           |                                 |           |                   |
| <i>In situ</i>  | 447,307 (5.7%)                  | 4,136,939                 | 5,942 (5.0%)                    | 143.6     | 3,836                           | 92.7      | 1.55 (1.51–1.59)  |
| Localized       | 2,938,939 (37.5%)               | 24,566,825                | 56,065 (47.0%)                  | 228.2     | 29,528                          | 120.2     | 1.90 (1.88–1.91)  |
| Regional        | 1,291,329 (16.5%)               | 7,318,490                 | 19,633 (16.5%)                  | 268.3     | 7,400                           | 101.1     | 2.65 (2.62–2.69)  |
| Distant         | 1,376,743 (17.5%)               | 2,725,893                 | 10,987 (9.2%)                   | 403.1     | 3,475                           | 127.5     | 3.16 (3.10–3.22)  |
| Unstaged        | 1,792,052 (22.8%)               | 6,853,006                 | 26,601 (22.3%)                  | 388.2     | 10,716                          | 156.4     | 2.48 (2.45–2.51)  |
| Surgery         |                                 |                           |                                 |           |                                 |           |                   |
| Yes             | 4,627,898 (59.0%)               | 35,043,784                | 71,451 (59.9%)                  | 203.9     | 36,740                          | 104.8     | 1.94 (1.93–1.96)  |
| No              | 3,096,678 (39.5%)               | 10,147,592                | 46,310 (38.8%)                  | 456.4     | 17,664                          | 174.1     | 2.62 (2.60–2.65)  |
| Unknown         | 121,794 (1.6%)                  | 409,777                   | 1,467 (1.2%)                    | 358.0     | 551                             | 134.5     | 2.66 (2.53–2.80)  |

|                    |                      |            |                    |       |        |       |                     |
|--------------------|----------------------|------------|--------------------|-------|--------|-------|---------------------|
| Chemotherapy       |                      |            |                    |       |        |       |                     |
| Yes                | 1,913,324<br>(24.4%) | 8,070,822  | 13,749<br>(11.5%)  | 170.4 | 6,442  | 79.8  | 2.13<br>(2.10–2.17) |
| No/Unknown         | 5,933,046<br>(75.6%) | 37,530,330 | 105,479<br>(88.5%) | 281.1 | 48,513 | 129.3 | 2.17<br>(2.16–2.19) |
| Radiotherapy       |                      |            |                    |       |        |       |                     |
| Yes                | 2,147,710<br>(27.4%) | 12,695,889 | 27,279<br>(22.9%)  | 214.9 | 13,735 | 108.2 | 1.99<br>(1.96–2.01) |
| No/unknown         | 5,698,660<br>(72.6%) | 32,905,263 | 91,949<br>(77.1%)  | 279.4 | 41,220 | 125.3 | 2.23<br>(2.22–2.25) |
| Smoking prevalence |                      |            |                    |       |        |       |                     |
| Low                | 1,308,905<br>(16.7%) | 8,406,893  | 17,316<br>(14.5%)  | 206.0 | 10,599 | 126.1 | 1.63<br>(1.61–1.66) |
| Median             | 1,308,906<br>(16.7%) | 9,119,074  | 21,469<br>(18.0%)  | 235.4 | 11,513 | 126.3 | 1.86<br>(1.84–1.89) |
| High               | 1,308,906<br>(16.7%) | 8,433,315  | 24,940<br>(20.9%)  | 295.7 | 10,969 | 130.1 | 2.27<br>(2.25–2.30) |
| Unknown            | 3,919,653<br>(50.0%) | 19,641,871 | 55,503<br>(46.6%)  | 282.6 | 21,874 | 111.4 | 2.54<br>(2.52–2.56) |
| SES                |                      |            |                    |       |        |       |                     |
| Low                | 2,276,448<br>(29.0%) | 10,011,552 | 31,310<br>(26.3%)  | 312.7 | 13,472 | 134.6 | 2.32<br>(2.30–2.35) |
| Median             | 2,276,449<br>(29.0%) | 13,393,773 | 34,245<br>(28.7%)  | 255.7 | 17,115 | 127.8 | 2.00<br>(1.98–2.02) |
| High               | 2,276,450<br>(29.0%) | 14,074,860 | 29,766<br>(25.0%)  | 211.5 | 17,136 | 121.7 | 1.74<br>(1.72–1.76) |
| Unknown            | 1,017,023<br>(13.0%) | 8,120,968  | 23,907<br>(20.1%)  | 294.4 | 7,232  | 89.1  | 3.31<br>(3.26–3.35) |

Abbreviations: COPD, chronic obstructive pulmonary disease; SMR, standardized mortality ratios; CI, confidence interval; SES, socioeconomic status.

\*The SMRs were estimated as the ratios of observed to expected number of deaths. The observed values represented the number of COPD deaths in cancer patients, whereas the expected values represented the number of individuals who died of COPD in the general population, with a similar distribution of age, sex, race, and calendar year.

The COPD mortality risk in cancer survivors was higher than that in the general population over the entire follow-up after cancer diagnosis (Figure 3B and Supplementary Figure 3). An increasing trend for risk of COPD death was observed in patients with cancer surviving more than 5 years, and the highest risk of COPD mortality was observed after a long-term follow-up of more than 15 years. Patients with lung cancer had a relatively high SMR of 10.9 (95% CI, 10.7–11.12) in the first year after diagnosis (Figure 3B and Supplementary Figure 3). This SMR decreased to 6.02 (95% CI, 5.87–6.16) after 5 years of follow-up and increased again throughout survivorship. The SMRs for risk of COPD death in all cancer types according to follow-up time after a cancer diagnosis are presented in Supplementary Figure 3.

## DISCUSSION

This study's findings revealed that patients with cancer are at increased risk of death due to COPD and highlight the importance of respiratory care throughout cancer survivorship. Previous studies have mainly focused on COPD's impact on cancer mortality [20, 21].

However, the relationship between cancer and COPD mortality remains unclear. Our study provided a large and comprehensive characterization of COPD mortality in patients with cancer, using a population-based cancer registry across 28 cancer sites and including 40 years of data.

Our results suggest that COPD prevention strategies should be aimed at patients with lung, prostate, breast, colorectal, and bladder cancers. Although less common, certain types of cancers of the head and neck and genitourinary system (particularly, the larynx, oral cavity, pharynx, cervix uteri, and vulva) are associated with a higher risk of death due to COPD; this information may be useful for clinicians and PCPs to develop targeted prevention strategies.

Lung cancer and COPD are associated with cigarette smoking and often occur as comorbidities. There is increasing evidence linking the diseases beyond this common mechanism, such as premature aging, genetic predisposition, telomere shortening, mitochondrial dysfunction, and epigenetic changes [5, 22]. In this study, lung cancer was identified as the cancer type with

the highest risk of COPD mortality. Furthermore, COPD was the second most common cause of non-cancer deaths in patients with lung cancer. These two diseases are likely to place a considerable burden on health services in the future, and our data underscore the importance of the close involvement of pulmonologists and PCPs with patients with lung cancer throughout survivorship. Notably, the observed very high risk of

dying from COPD within the first year after lung cancer diagnosis supports pulmonologists' early involvement in treating such patients.

We found that patients with cancers of the larynx had the highest mortality rate amongst those with cancers of the extrapulmonary organs. Cigarette smoking is also a significant risk factor for laryngeal cancer. Two studies

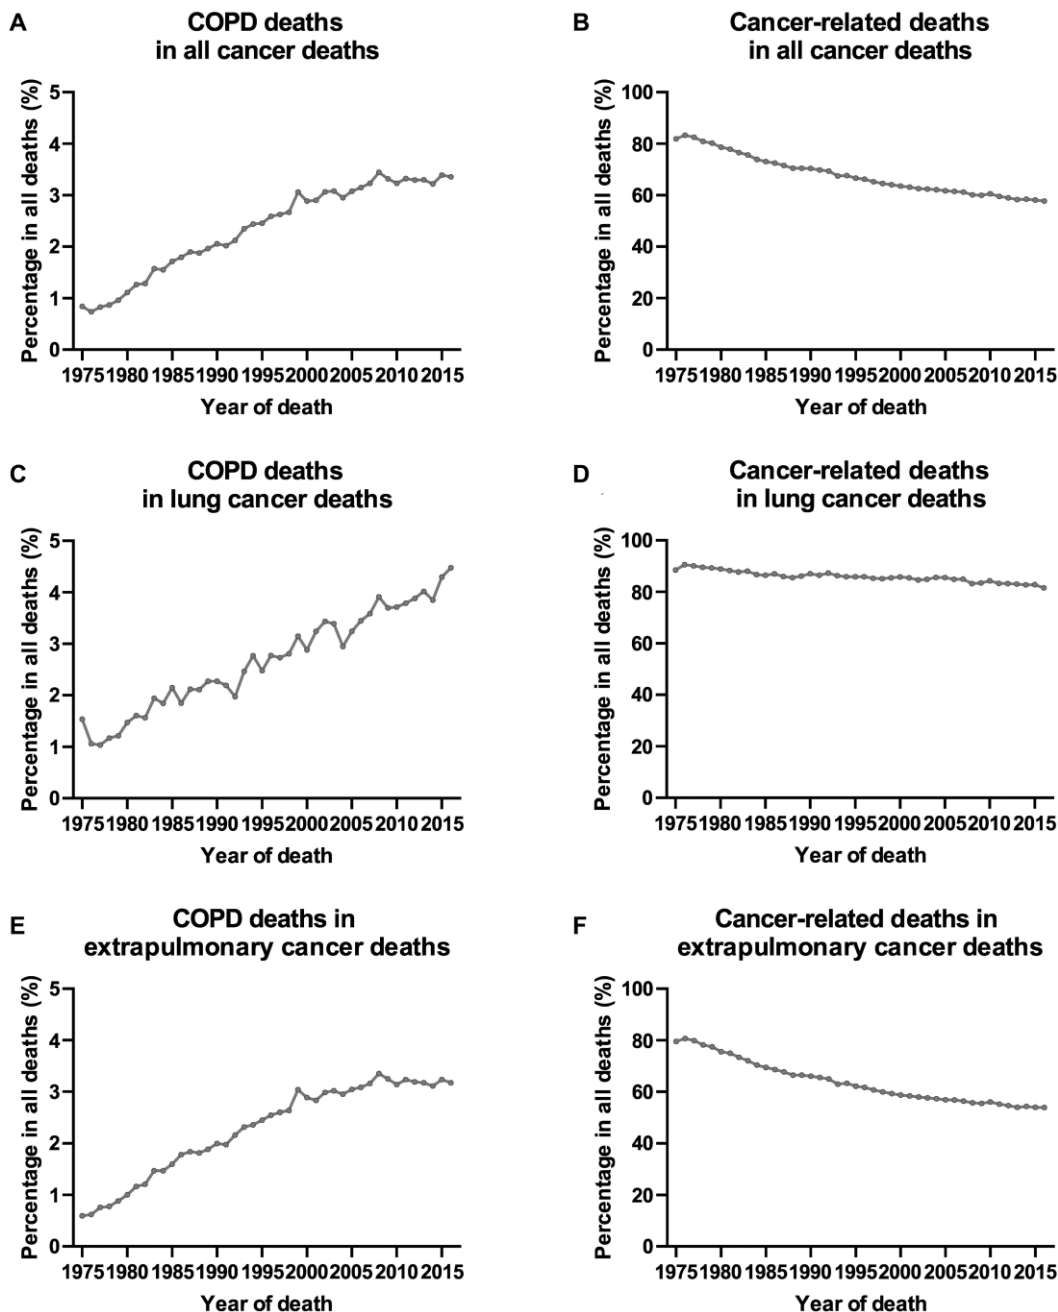

**Figure 2. Trends of COPD deaths and cancer-related deaths among all cancer deaths in SEER 9 registries by calendar year of death.** (A) Trends of COPD deaths among all cancer deaths in SEER 9 registries by calendar year of death; (B) trends of cancer-related deaths among all cancer deaths in SEER 9 registries by calendar year of death; (C) trends of COPD deaths among lung cancer deaths in SEER 9 registries by calendar year of death; (D) trends of cancer-related deaths among lung cancer deaths in SEER 9 registries by calendar year of death; (E) trends of COPD deaths among extrapulmonary cancer deaths in SEER 9 registries by calendar year of death; (F) trends of cancer-related deaths among extrapulmonary cancer deaths in SEER 9 registries by calendar year of death.

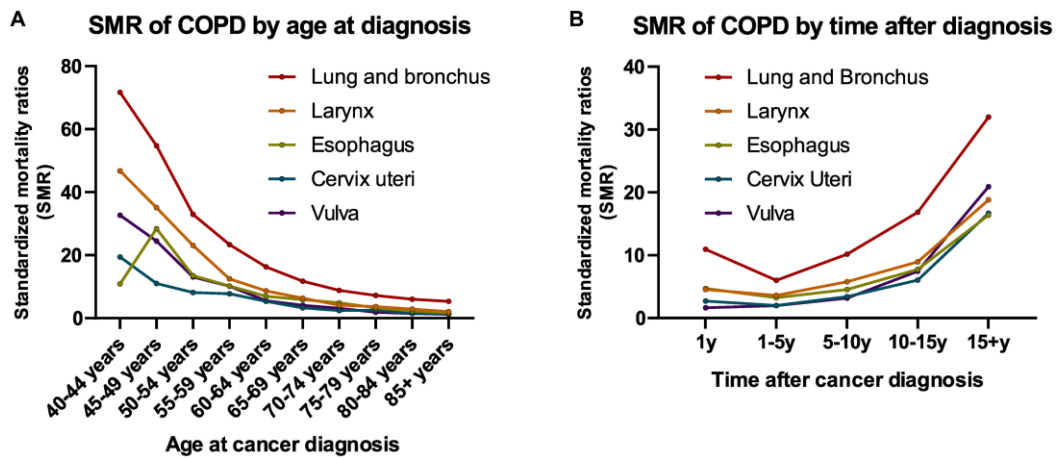

**Figure 3.** Trends of COPD mortality among patients diagnosed with cancer in SEER 18 registries by (A) age at diagnosis; (B) time after diagnosis.

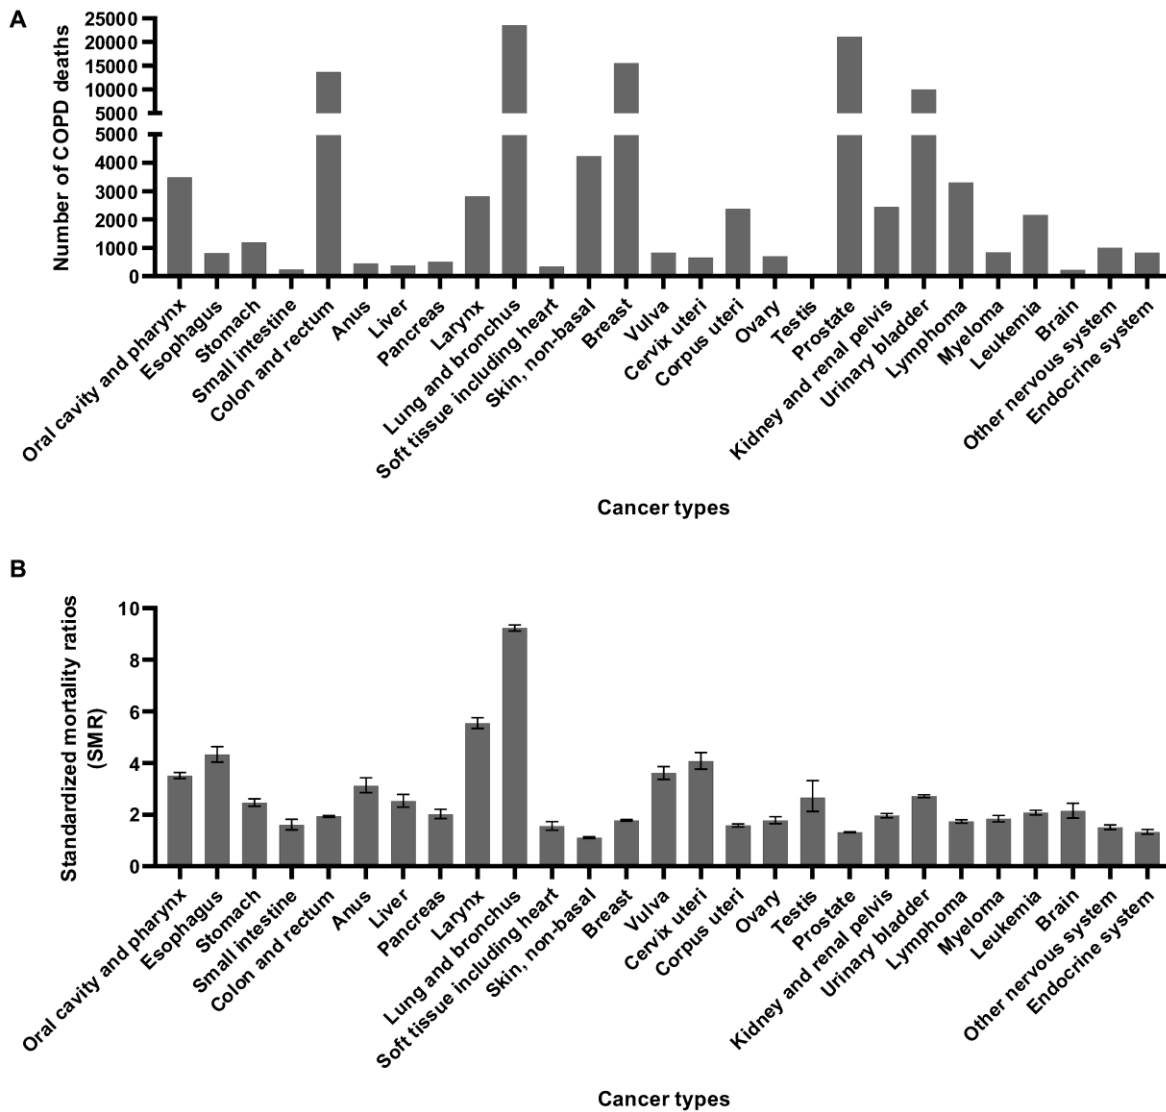

**Figure 4.** COPD death number and SMR among patients diagnosed with cancer between 1975 and 2016 in SEER 18 registries by anatomic sites. (A) COPD death number by anatomic site; (B) COPD SMR by anatomic site.

**Table 2. COPD mortality among patients with lung cancer between 1975 and 2016 in SEER 18 registries by histology and anatomic sites.**

| Characteristics | No. of patients with cancer (%) | Total person years of follow-up | Death from COPD            |                                            |                            |                                            | SMR* (95% CI)    |
|-----------------|---------------------------------|---------------------------------|----------------------------|--------------------------------------------|----------------------------|--------------------------------------------|------------------|
|                 |                                 |                                 | Patients with cancer       |                                            | General population         |                                            |                  |
|                 |                                 |                                 | No. of observed deaths (%) | Mortality rates (per 100,000 person-years) | No. of expected deaths (%) | Mortality rates (per 100,000 person-years) |                  |
| All lung cancer | 965,341 (100%)                  | 1,812,077                       | 23,542 (100%)              | 1299.2                                     | 2,548                      | 140.6                                      | 9.24 (9.12–9.36) |
| Histology       |                                 |                                 |                            |                                            |                            |                                            |                  |
| SCLC            | 135,702 (14.1%)                 | 151,831                         | 1,598 (6.8%)               | 1052.5                                     | 180                        | 118.4                                      | 8.89 (8.47–9.34) |
| NSCLC           | 829,639 (85.9%)                 | 1,660,246                       | 21,944 (93.2%)             | 1321.7                                     | 2,369                      | 142.7                                      | 9.26 (9.14–9.39) |
| AC              | 334,962 (34.7%)                 | 846,564                         | 6,101 (25.9%)              | 720.7                                      | 1,066                      | 126.0                                      | 5.72 (5.58–5.87) |
| SC              | 202,955 (21.0%)                 | 417,356                         | 6,969 (29.6%)              | 1669.8                                     | 669                        | 160.2                                      | 10.4 (10.2–10.7) |
| Other           | 291,722 (30.2%)                 | 396,326                         | 8,874 (37.7%)              | 2239.1                                     | 634                        | 159.9                                      | 14.0 (13.7–14.3) |
| Site            |                                 |                                 |                            |                                            |                            |                                            |                  |
| Main bronchus   | 50,204 (5.2%)                   | 57,763                          | 864 (3.7%)                 | 1495.8                                     | 64                         | 110.8                                      | 13.5 (12.6–14.4) |
| Upper lobe      | 465,097 (48.2%)                 | 1,014,284                       | 12,809 (54.4%)             | 1262.9                                     | 1,389                      | 136.9                                      | 9.22 (9.06–9.38) |
| Middle lobe     | 39,527 (4.1%)                   | 93,545                          | 1,020 (4.3%)               | 1090.4                                     | 122                        | 130.0                                      | 8.39 (7.89–8.92) |
| Lower lobe      | 218,819 (22.7%)                 | 458,962                         | 5,630 (23.9%)              | 1226.7                                     | 692                        | 150.7                                      | 8.14 (7.93–8.36) |
| Lung, NOS       | 191,694 (19.9%)                 | 187,523                         | 3,219 (13.7%)              | 1716.6                                     | 282                        | 150.6                                      | 11.4 (11.0–11.8) |

Abbreviations: COPD, chronic obstructive pulmonary disease; SMR, standardized mortality ratios; CI, confidence interval; SCLC, small cell lung cancer; NSCLC, non-small cell lung cancer; NOS, not otherwise specified.

\*The SMRs were estimated as the ratios of observed to expected number of deaths. The observed values represented the number of COPD deaths in cancer patients, whereas the expected values represented the number of individuals who died of COPD in the general population, with a similar distribution of age, sex, race, and calendar year.

have reported a relatively high prevalence of COPD in patients with laryngeal cancer [7, 23] and suggested that COPD might be associated with worse survival rates. Other smoking-related cancers, including esophageal and oropharyngeal cancers, have also been associated with a higher SMR. Some genitourinary malignancies, such as cervical, vulva, and bladder cancers, were identified as having a relatively higher risk of death from COPD. Further in-depth studies are necessary to explore this association. Furthermore, we observed that cancer stages were associated with the COPD mortality risk, highlighting the impact and burden of cancer on COPD outcomes.

Our work also evaluated the SMRs of COPD as a function of age at diagnosis and follow-up time after a cancer diagnosis. Young patients had a very high risk of COPD mortality compared with the age-matched general population. This was in agreement with previous studies showing that young adults with cancer

have an elevated mortality burden from non-cancer causes [24, 25]. In patients with lung cancer, we observed a peak window of COPD deaths within the first year of diagnosis. This finding may be due to the impact of aggressive treatment, such as chest surgery and chest radiation therapy, or anti-cancer drugs with pulmonary toxicity. Another plausible explanation is that the diagnosis of cancer could have been made incidentally when treating severe or fatal co-existing COPD. For nearly all cancers, the risk of death from COPD began to increase by 5 years after diagnosis, and this trend continued to increase with follow-up time. This can be partly explained by the fact that patients with cancer are more prone to developing COPD with aging and lung function impairment [7]. Other characteristics associated with a higher risk of COPD deaths in patients with cancer, such as black ethnicity, high smoking prevalence, low SES level, and unmarried status, were similar to those in the general population [26–29].



**Table 3. COPD mortality among patients diagnosed with cancer between 1975 and 2016 in SEER 18 registries by cancer stage.**

| Cancer type and stage          | No. of patients (%) | Deaths from COPD           |                  |
|--------------------------------|---------------------|----------------------------|------------------|
|                                |                     | No. of observed deaths (%) | SMR* (95% CI)    |
| All cancer patients            |                     |                            |                  |
| <i>In situ</i>                 | 447,307 (5.7%)      | 5,942 (5.0%)               | 1.55 (1.51–1.59) |
| Localized                      | 2,938,939 (37.5%)   | 56,065 (47.0%)             | 1.90 (1.88–1.91) |
| Regional                       | 1,291,329 (16.5%)   | 19,633 (16.5%)             | 2.65 (2.62–2.69) |
| Distant                        | 1,376,743 (17.5%)   | 10,987 (9.2%)              | 3.16 (3.10–3.22) |
| Unstaged                       | 1,792,052 (22.8%)   | 26,601 (22.3%)             | 2.48 (2.45–2.51) |
| Lung cancer patients           |                     |                            |                  |
| <i>In situ</i>                 | 723 (0.1%)          | 40 (0.2%)                  | 10.8 (7.91–14.7) |
| Localized                      | 130,972 (13.7%)     | 7,484 (31.8%)              | 7.94 (7.77–8.13) |
| Regional                       | 188,902 (19.8%)     | 5,805 (24.7%)              | 8.51 (8.30–8.74) |
| Distant                        | 415,214 (43.4%)     | 4,812 (20.5%)              | 10.2 (9.91–10.5) |
| Unstaged                       | 220,635 (23.1%)     | 5,375 (22.9%)              | 12.0 (11.7–12.3) |
| Extrapulmonary cancer patients |                     |                            |                  |
| <i>In situ</i>                 | 446,584 (6.5%)      | 5,902 (6.2%)               | 1.54 (1.50–1.58) |
| Localized                      | 2,807,967 (40.8%)   | 48,581 (50.8%)             | 1.70 (1.68–1.71) |
| Regional                       | 1,102,427 (16.0%)   | 13,828 (14.4%)             | 2.06 (2.02–2.09) |
| Distant                        | 961,529 (14.0%)     | 6,175 (6.5%)               | 2.06 (2.01–2.11) |
| Unstaged                       | 1,571,417 (22.8%)   | 21,226 (22.2%)             | 2.07 (2.04–2.10) |

Abbreviations: COPD, chronic obstructive pulmonary disease; SMR, standardized mortality ratios; CI, confidence interval.

\*The SMRs were estimated as the ratios of observed to expected number of deaths. The observed values represented the number of COPD deaths in cancer patients, whereas the expected values represented the number of individuals who died of COPD in the general population, with a similar distribution of age, sex, race, and calendar year.

Our study had some limitations. First, there is a risk of reporting bias in death certificates leading to misclassification of the causes of death [30, 31]. The SEER (Surveillance, Epidemiology, and End Results) mortality data were provided by the National Center for Health Statistics and National Vital Statistics System. Systematic and standardized data collection procedures are used to ensure that the causes of death recorded in SEER are accurate [32]. Previous studies also examined the validity and reliability of death certificates in SEER and found acceptable results [33, 34]. Second, SEER does not contain information regarding pre-existing comorbidities, performance status, quality of life, lung function, or detailed and complete cancer treatment information. Thus, we could not analyze the cause-and-effect relationship between different risk factors and COPD. Nevertheless, analysis of the SEER database's extensive available data remains a powerful, useful, and integral tool in exploratory medical research [32]. Third, smoking status and SES were not available at an individual level. Consequently, we used an area-based measure of adult smoking prevalence or SES level that was available in SEER as an approximation [35]. Fourth, the study was based on mortality data of COPD in patients

with cancer and the relevant general population; thus, we could not analyze COPD's influence on lung and extrapulmonary cancers. We recommend further studies to fill in the gaps. To reduce the impact of this limitation, we extracted similar sub-groups from cancer population and general population, and then compared the COPD mortality between these two groups to evaluate the impact of cancer diagnosis to COPD mortality. This approach hypothesized that factors other than cancer diagnosis were highly similar in this population. It cannot eliminate the impact of time difference, but can reduce them.

## CONCLUSIONS

This study's findings show that patients with cancer are at an increased risk of dying from COPD. The COPD mortality risk is much higher in patients with lung cancer than in those with extrapulmonary cancers. Among all extrapulmonary cancers, laryngeal and esophageal cancers had the highest COPD mortality risk, which rises with time. Our results suggest a need for enhanced, coordinated multidisciplinary care between oncologists, pulmonologists, and PCPs throughout cancer survivorship.

## MATERIALS AND METHODS

### Data sources and study population

A retrospective cohort study was performed using data from the SEER program. This program involves population-based cancer registries from the National Cancer Institute and routinely collects and reports data on cancer demographics, incidence, follow-up data, anatomic sites, morphology, stage, therapy, and SES of patients with cancer in the US [36].

All patients diagnosed with cancer between 1975 and 2016 were identified from the SEER 18 database (2019 submission) using SEER\*Stat software, version 8.3.6 [37]. Data from patients with only one type of cancer or those with a first primary cancer were included. Patients were excluded if their diagnosis was obtained exclusively from death certificates or autopsy reports. We further excluded patients without complete follow-up information, including data on follow-up duration, age at diagnosis, or race. Given that COPD mainly occurred in elderly patients, we also excluded patients younger than 40 years of age. For comparison with the general population, mortality data for the general US population registered in the National Center for Health Statistics between 1975 and 2016 were also obtained from the SEER database [37] (Supplementary Table 3).

Since the SEER is a publicly available database, access to the data required a signed research data agreement form. Institutional review board approval and the need for informed consent were waived for data obtained from the SEER database, as the study did not involve human subjects and all data were anonymized.

### Definition of variables

All patients were observed from the time of cancer diagnosis until death, exiting the study, or until the end of the study (December 31, 2016). Death from COPD was chosen as the event of interest. We evaluated the following variables for the patients included in this study: age at diagnosis, sex, race, year of diagnosis, marital status, survival (in months), cause of death, anatomic site of the cancer, cancer stage, surgical therapy, chemotherapy, radiotherapy, SES, and smoking prevalence.

Patients with the cause of death coded as "Chronic Obstructive Pulmonary Disease and Allied Conditions (50130)" were considered to have died due to COPD. The cause of death variable for COPD was 490–493 and 519.3 in the ICD-8 (International Statistical Classification of Diseases and Related Health Problems, eighth revision) codes for cases diagnosed between

1975 to 1978, 490–496 in the ICD-9 for cases diagnosed between 1979 and 1998, and J40-J47 in the ICD-10 for cases diagnosed between 1999 and 2016.

The SES of patients was measured using Yost *et al.*'s census tract-level composite SES index provided by SEER for patients diagnosed between 1990 and 2016, formulated using a principal components analysis on the SES measures [38, 39]. An SES index is a complex matrix of seven aspects of SES information, including the median household income, median house value, median gross rent, percentage of the population below 150% of the poverty level, education index, percentage of working class, and percentage of unemployed workers. The SES scores were further divided into tertiles, as previously described [39].

Smoking prevalence (percentage of current smokers in the population aged 18 years or above) was determined with model-based small area estimation techniques using data from national surveys and multiple related sources [35]. The smoking prevalence was estimated at various time points between 1997 and 2010; thus, the cases were restricted to this period when assessing the impact of smoking prevalence. The smoking prevalence was further divided into tertiles for analysis.

As the SEER database records the duration of survival in months and a month was the shortest time interval available for analysis, survival durations shorter than 1 month were recorded as 0 months in the SEER program. Therefore, according to standard epidemiologic conventions, patients with durations of survival coded as 0 were converted to half-a-month periods [40].

### Statistical analyses

The COPD mortality rates were calculated as the number of deaths due to COPD divided by person-years of follow-up. The SMRs and corresponding 95% CIs of non-cancer deaths were calculated according to previously published methods [32, 40–42]. The SMRs were estimated as the ratios of observed deaths to the expected number of deaths. The observed values represented the number of COPD deaths in patients with cancer, whereas the expected values represented the number of individuals who died of COPD in the general population, given a similar distribution of age, sex, race, and calendar year. For the standardization of age and calendar year, 5-year-categories were created, and the values at the time of diagnosis were adopted. The race groups were defined as white, black, and other. The relative demographic distribution of the patients with cancer and general population are shown in Supplementary Tables 3 and 4. The 95% CIs of the SMRs were obtained using an approximation from the

Poisson distribution [40, 43]. For objectives 1, 2, and 3, we describe the risk of death from COPD as a function of demographic characteristics, cancer types and stages, and follow-up time after a cancer diagnosis.

All statistical tests were two-sided, and  $P < .05$  was considered to indicate statistical significance. Analyses were performed using SEER\*Stat software, version 8.3.6 (US Department of Health and Human Services) and the R version 3.52 (The R Project for Statistical Computing) statistical software package [37, 44].

## Abbreviations

COPD: chronic obstructive pulmonary disease; SEER: Surveillance, Epidemiology, and End Results; SMRs: standardized mortality ratios; CI: confidence interval; PCPs: primary care physicians; SES: socioeconomic status; ICD: International Statistical Classification of Diseases and Related Health Problems.

## AUTHOR CONTRIBUTIONS

Research designer: Yognqiang Zheng, Bian Wu. Collecting, analyzing and interpreting data: Yongqiang Zheng, Jiangtong Peng, Kaixu Yu, Yun Yang, Xi Wang, Xue Yang, Jiixin Qian. The main contributors to writing manuscripts: Yan Huang, Xiwen Zheng, Ying Chen, Xindi Wang, Xiaolan Gao, Bian Wu. Revision: Xiwen Zheng, Yongqiang Zheng, Bian Wu. The final draft read and approved by all authors.

## ACKNOWLEDGMENTS

The interpretation and reporting of these data are the sole responsibility of the authors. The authors acknowledge the efforts of the National Cancer Institute and the SEER Program tumor registries in the creation of the SEER database.

## CONFLICTS OF INTEREST

All authors of this study stated that they have no conflicts of interests.

## FUNDING

The study received no funding.

## REFERENCES

1. Murphy SL, Xu J, Kochanek KD, Curtin SC, Arias E. Deaths: Final Data for 2015. *Natl Vital Stat Rep*. 2017; 66:1–75. PMID:[29235985](https://pubmed.ncbi.nlm.nih.gov/29235985/)
2. Roth GA, Abate D, Abate KH, Abay SM, Abbafati C, Abbasi N, Abbastabar H, Abd-Allah F, Abdela J, Abdelalim A, Abdollahpour I, Abdulkader RS, Abebe HT, et al, and GBD 2017 Causes of Death Collaborators. Global, regional, and national age-sex-specific mortality for 282 causes of death in 195 countries and territories, 1980–2017: a systematic analysis for the Global Burden of Disease Study 2017. *Lancet*. 2018; 392:1736–88. [https://doi.org/10.1016/S0140-6736\(18\)32203-7](https://doi.org/10.1016/S0140-6736(18)32203-7) PMID:[30496103](https://pubmed.ncbi.nlm.nih.gov/30496103/)
3. World Health Organization. Cancer. Available at <https://www.who.int/news-room/fact-sheets/detail/Cancer>. Accessed on November 18, 2019.
4. World Health Organization. Chronic obstructive pulmonary disease (COPD). Available at [https://www.who.int/news-room/fact-sheets/detail/chronic-obstructive-pulmonary-disease-\(copd\)](https://www.who.int/news-room/fact-sheets/detail/chronic-obstructive-pulmonary-disease-(copd)). Accessed on November 18, 2019.
5. Durham AL, Adcock IM. The relationship between COPD and lung cancer. *Lung Cancer*. 2015; 90:121–27. <https://doi.org/10.1016/j.lungcan.2015.08.017> PMID:[26363803](https://pubmed.ncbi.nlm.nih.gov/26363803/)
6. Kornum JB, Sværke C, Thomsen RW, Lange P, Sørensen HT. Chronic obstructive pulmonary disease and cancer risk: a Danish nationwide cohort study. *Respir Med*. 2012; 106:845–52. <https://doi.org/10.1016/j.rmed.2011.12.009> PMID:[22214771](https://pubmed.ncbi.nlm.nih.gov/22214771/)
7. van de Schans SA, Janssen-Heijnen ML, Biesma B, Smeenk FW, van de Poll-Franse LV, Seynaeve C, Coebergh JW. COPD in cancer patients: higher prevalence in the elderly, a different treatment strategy in case of primary tumours above the diaphragm, and a worse overall survival in the elderly patient. *Eur J Cancer*. 2007; 43:2194–202. <https://doi.org/10.1016/j.ejca.2007.08.011> PMID:[17884463](https://pubmed.ncbi.nlm.nih.gov/17884463/)
8. The Department of Economic and Social Affairs of the United Nations Secretariat. The World Population Ageing. Available at [https://www.un.org/en/development/desa/population/publications/pdf/ageing/WPA2017\\_Highlights.pdf](https://www.un.org/en/development/desa/population/publications/pdf/ageing/WPA2017_Highlights.pdf). Accessed on November 18, 2020.
9. Pilleron S, Sarfati D, Janssen-Heijnen M, Vignat J, Ferlay J, Bray F, Soerjomataram I. Global cancer incidence in older adults, 2012 and 2035: A population-based study. *Int J Cancer*. 2019; 144:49–58. <https://doi.org/10.1002/ijc.31664> PMID:[29978474](https://pubmed.ncbi.nlm.nih.gov/29978474/)
10. Ito K, Barnes PJ. COPD as a disease of accelerated lung aging. *Chest*. 2009; 135:173–80.

- <https://doi.org/10.1378/chest.08-1419>  
PMID:[19136405](https://pubmed.ncbi.nlm.nih.gov/19136405/)
11. MacNee W. Accelerated lung aging: a novel pathogenic mechanism of chronic obstructive pulmonary disease (COPD). *Biochem Soc Trans*. 2009; 37:819–23.  
<https://doi.org/10.1042/BST0370819>  
PMID:[19614601](https://pubmed.ncbi.nlm.nih.gov/19614601/)
  12. Cortopassi F, Gurung P, Pinto-Plata V. Chronic Obstructive Pulmonary Disease in Elderly Patients. *Clin Geriatr Med*. 2017; 33:539–52.  
<https://doi.org/10.1016/j.cger.2017.06.006>  
PMID:[28991649](https://pubmed.ncbi.nlm.nih.gov/28991649/)
  13. Forey BA, Thornton AJ, Lee PN. Systematic review with meta-analysis of the epidemiological evidence relating smoking to COPD, chronic bronchitis and emphysema. *BMC Pulm Med*. 2011; 11:36.  
<https://doi.org/10.1186/1471-2466-11-36>  
PMID:[21672193](https://pubmed.ncbi.nlm.nih.gov/21672193/)
  14. Hecht SS. Tobacco carcinogens, their biomarkers and tobacco-induced cancer. *Nat Rev Cancer*. 2003; 3:733–44.  
<https://doi.org/10.1038/nrc1190>  
PMID:[14570033](https://pubmed.ncbi.nlm.nih.gov/14570033/)
  15. Alexandrov LB, Ju YS, Haase K, Van Loo P, Martincorena I, Nik-Zainal S, Totoki Y, Fujimoto A, Nakagawa H, Shibata T, Campbell PJ, Vineis P, Phillips DH, Stratton MR. Mutational signatures associated with tobacco smoking in human cancer. *Science*. 2016; 354:618–22.  
<https://doi.org/10.1126/science.aag0299>  
PMID:[27811275](https://pubmed.ncbi.nlm.nih.gov/27811275/)
  16. Miller KD, Nogueira L, Mariotto AB, Rowland JH, Yabroff KR, Alfano CM, Jemal A, Kramer JL, Siegel RL. Cancer treatment and survivorship statistics, 2019. *CA Cancer J Clin*. 2019; 69:363–85.  
<https://doi.org/10.3322/caac.21565>  
PMID:[31184787](https://pubmed.ncbi.nlm.nih.gov/31184787/)
  17. Piccirillo JF, Tierney RM, Costas I, Grove L, Spitznagel EL Jr. Prognostic importance of comorbidity in a hospital-based cancer registry. *JAMA*. 2004; 291:2441–47.  
<https://doi.org/10.1001/jama.291.20.2441>  
PMID:[15161894](https://pubmed.ncbi.nlm.nih.gov/15161894/)
  18. Simonelli C, Annunziata MA, Chimienti E, Berretta M, Tirelli U. Cancer survivorship: a challenge for the European oncologists. *Ann Oncol*. 2008; 19:1216–17.  
<https://doi.org/10.1093/annonc/mdn384>  
PMID:[18534962](https://pubmed.ncbi.nlm.nih.gov/18534962/)
  19. Yancik R, Ganz PA, Varricchio CG, Conley B. Perspectives on comorbidity and cancer in older patients: approaches to expand the knowledge base. *J Clin Oncol*. 2001; 19:1147–51.  
<https://doi.org/10.1200/JCO.2001.19.4.1147>  
PMID:[11181680](https://pubmed.ncbi.nlm.nih.gov/11181680/)
  20. van Gestel YR, Hoeks SE, Sin DD, Hüzeir V, Stam H, Mertens FW, van Domburg RT, Bax JJ, Poldermans D. COPD and cancer mortality: the influence of statins. *Thorax*. 2009; 64:963–67.  
<https://doi.org/10.1136/thx.2009.116731>  
PMID:[19720607](https://pubmed.ncbi.nlm.nih.gov/19720607/)
  21. Wasswa-Kintu S, Gan WQ, Man SF, Pare PD, Sin DD. Relationship between reduced forced expiratory volume in one second and the risk of lung cancer: a systematic review and meta-analysis. *Thorax*. 2005; 60:570–75.  
<https://doi.org/10.1136/thx.2004.037135>  
PMID:[15994265](https://pubmed.ncbi.nlm.nih.gov/15994265/)
  22. Houghton AM. Mechanistic links between COPD and lung cancer. *Nat Rev Cancer*. 2013; 13:233–45.  
<https://doi.org/10.1038/nrc3477>  
PMID:[23467302](https://pubmed.ncbi.nlm.nih.gov/23467302/)
  23. Gottlieb M, Marsaa K, Godtfredsen NS, Mellemegaard A. Prevalence and management of pulmonary comorbidity in patients with lung and head and neck cancer. *Acta Oncol*. 2015; 54:767–71.  
<https://doi.org/10.3109/0284186X.2014.1001496>  
PMID:[25907821](https://pubmed.ncbi.nlm.nih.gov/25907821/)
  24. Zaorsky NG, Churilla TM, Egleston BL, Fisher SG, Ridge JA, Horwitz EM, Meyer JE. Causes of death among cancer patients. *Ann Oncol*. 2017; 28:400–07.  
<https://doi.org/10.1093/annonc/mdw604>  
PMID:[27831506](https://pubmed.ncbi.nlm.nih.gov/27831506/)
  25. Anderson C, Lund JL, Weaver MA, Wood WA, Olshan AF, Nichols HB. Noncancer mortality among adolescents and young adults with cancer. *Cancer*. 2019; 125:2107–14.  
<https://doi.org/10.1002/cncr.32063>  
PMID:[30892701](https://pubmed.ncbi.nlm.nih.gov/30892701/)
  26. Davis RM, Novotny TE. The epidemiology of cigarette smoking and its impact on chronic obstructive pulmonary disease. *Am Rev Respir Dis*. 1989; 140:S82–84.  
<https://doi.org/10.1164/ajrccm/140.3 Pt 2.S82>  
PMID:[2782765](https://pubmed.ncbi.nlm.nih.gov/2782765/)
  27. Eisner MD, Blanc PD, Omachi TA, Yelin EH, Sidney S, Katz PP, Ackerson LM, Sanchez G, Tolstykh I, Iribarren C. Socioeconomic status, race and COPD health outcomes. *J Epidemiol Community Health*. 2011; 65:26–34.  
<https://doi.org/10.1136/jech.2009.089722>  
PMID:[19854747](https://pubmed.ncbi.nlm.nih.gov/19854747/)
  28. Gershon AS, Dolmage TE, Stephenson A, Jackson B. Chronic obstructive pulmonary disease and

- socioeconomic status: a systematic review. *COPD*. 2012; 9:216–26.  
<https://doi.org/10.3109/15412555.2011.648030>  
 PMID:22497534
29. Almagro P, Calbo E, Ochoa de Echagüen A, Barreiro B, Quintana S, Heredia JL, Garau J. Mortality after hospitalization for COPD. *Chest*. 2002; 121:1441–48.  
<https://doi.org/10.1378/chest.121.5.1441>  
 PMID:12006426
  30. Park HS, Lloyd S, Decker RH, Wilson LD, Yu JB. Limitations and biases of the Surveillance, Epidemiology, and End Results database. *Curr Probl Cancer*. 2012; 36:216–24.  
<https://doi.org/10.1016/j.currproblcancer.2012.03.011>  
 PMID:22481009
  31. Sun M, Trinh QD. A Surveillance, Epidemiology and End Results (SEER) database malfunction: perceptions, pitfalls and verities. *BJU Int*. 2016; 117:551–52.  
<https://doi.org/10.1111/bju.13226>  
 PMID:26190064
  32. Yang K, Zheng Y, Peng J, Chen J, Feng H, Yu K, Chen Y, Luo W, Yang P, Yang Y, Wu B. Incidence of Death From Unintentional Injury Among Patients With Cancer in the United States. *JAMA Netw Open*. 2020; 3:e1921647.  
<https://doi.org/10.1001/jamanetworkopen.2019.21647>  
 PMID:32083692
  33. Lund JL, Harlan LC, Yabroff KR, Warren JL. Should cause of death from the death certificate be used to examine cancer-specific survival? A study of patients with distant stage disease. *Cancer Invest*. 2010; 28:758–64.  
<https://doi.org/10.3109/07357901003630959>  
 PMID:20504221
  34. Hu CY, Xing Y, Cormier JN, Chang GJ. Assessing the utility of cancer-registry-processed cause of death in calculating cancer-specific survival. *Cancer*. 2013; 119:1900–07.  
<https://doi.org/10.1002/cncr.27968>  
 PMID:23408226
  35. Surveillance, Epidemiology, and End Results Program. Static County Attributes. Available at <https://seer.cancer.gov/seerstat/variables/countyattributes/static.html>. Accessed on December 17, 2019.
  36. Overview of the SEER program. Available at <https://seer.cancer.gov/about/overview.html>. Accessed on January 1, 2020.
  37. Surveillance Research Program, National Cancer Institute SEER\*Stat software [www.seer.cancer.gov/seerstat](http://www.seer.cancer.gov/seerstat) version 8.3.6.
  38. Yost K, Perkins C, Cohen R, Morris C, Wright W. Socioeconomic status and breast cancer incidence in California for different race/ethnic groups. *Cancer Causes Control*. 2001; 12:703–11.  
<https://doi.org/10.1023/a:1011240019516>  
 PMID:11562110
  39. Yu M, Tatalovich Z, Gibson JT, Cronin KA. Using a composite index of socioeconomic status to investigate health disparities while protecting the confidentiality of cancer registry data. *Cancer Causes Control*. 2014; 25:81–92.  
<https://doi.org/10.1007/s10552-013-0310-1>  
 PMID:24178398
  40. Koepsell TD, Weiss NS. *Epidemiologic Methods: Studying the Occurrence of Illness*. New York: Oxford University Press; 2003.
  41. Misono S, Weiss NS, Fann JR, Redman M, Yueh B. Incidence of suicide in persons with cancer. *J Clin Oncol*. 2008; 26:4731–38.  
<https://doi.org/10.1200/JCO.2007.13.8941>  
 PMID:18695257
  42. Breslow NE, Day NE. *Statistical methods in cancer research. Volume II--The design and analysis of cohort studies*. IARC Sci Publ. 1987; 82:1–406.  
 PMID:3329634
  43. Ury HK, Wiggins AD. Another shortcut method for calculating the confidence interval of a Poisson variable (or of a standardized mortality ratio). *Am J Epidemiol*. 1985; 122:197–98.  
<https://doi.org/10.1093/oxfordjournals.aje.a114083>  
 PMID:4014198
  44. R Core Team (2018). *R: A language and environment for statistical computing*. R Foundation for Statistical Computing, Vienna, Austria. Accessed at <https://www.R-project.org/>.

## SUPPLEMENTARY MATERIALS

### The calculation of standardized mortality ratio (SMR)

To facilitate a comparison between the cancer population and the general population, we used the so-called indirect method of adjustment to calculate the SMR [1–4]. The progress of calculation was as follow:

(1) Choose a reference or standard population: in this study, general US population collected by the National Center for Health Statistics between 1975 and 2016 were chosen as reference or standard population [5].

(2) Choose variables for standardization: four variables, age, sex, race and calendar year were chosen as variables used for standardization. For age, five-year categories were created in the course of standardization. Thus age was divided into 19 groups: “0 years”, “1–4 years”, “5–9 years”, “10–14 years”, “15–19 years”, “20–24 years”, “25–29 years”, “30–34 years”, “35–39 years”, “40–44 years”, “45–49 years”, “50–54 years”, “55–59 years”, “60–64 years”, “65–69 years”, “70–74 years”, “75–79 years”, “80–84 years”, “85+ years”. Sex were characterized as two group: “female” and “male”. If not specifically addressed, races were characterized as three categories: white, black and other. The “Other” group included the less frequent races: “Asian or Pacific Islander”, “American Indian/Alaska Native” and so on [6]. Calendar year of cancer diagnosis was also divided into five-years categories: “1975–1979”, “1980–1984”, “1985–1989”, “1990–1994”, “1995–1999”, “2000–2004”, “2005–2009”, “2010–2016”.

(3) Divide the cancer patients and general population into subgroups: both cancer patients and the general population were divided into subgroups characterized by the above variables for standardization. For each subgroup in cancer patients, total survival time (person-years) were calculated. Besides, the mortality rates for each subgroup of the chosen reference population, namely the general population abstracted from mortality data collected by the National Center for Health Statistics spanning 1975 to 2016 and accessed through the SEER program.

(4) Calculate the observed number of deaths in cancer patients: observed number of deaths represents the total number of deaths from certain causes in cancer patients recorded during the study period.

(5) Calculate the expected number of deaths: the expected number of deaths for each subgroup of

population was the product of corresponding observed person-years in this group of the cancer patients and the corresponding mortality rate in the comparable subgroup of the reference population. The total expected number of deaths was then a sum of the expected number of deaths for each subgroup of population.

(6) Calculate SMR: divide the total number of observed number of deaths by the expected number of deaths:

$$\text{SMR} = \frac{\text{Observed number of deaths}}{\text{Expected number of deaths}} = \frac{\text{Observed}}{\text{Expected}}$$

A SMR greater than 1.00 indicates that more mortality has occurred in cancer patients than expected, while a ratio less than 1.00 indicates that less mortality has occurred.

(7) Calculate 95% confidence intervals (CI): 95% CIs were obtained using an approximation based on an assumption of a Poisson regression model for mortality. 95% CI of SMR were obtained using an approximate Wald confidence limits from a Poisson distribution. The Rothman Greenland Method were used [3]:

$$\begin{aligned} \text{Lower limit} &= \exp[\ln(\text{SMR}) - Z_{1-\alpha/2}(1/\text{Observed})^{\frac{1}{2}}] \\ \text{Upper limit} &= \exp[\ln(\text{SMR}) + Z_{1-\alpha/2}(1/\text{Observed})^{\frac{1}{2}}] \end{aligned}$$

Where  $(1-\alpha/2)$  represents the desired confidence percentage for interval estimation, and  $Z_{1-\alpha/2}$  represents the number such that the chance that a standard normal variable falls between  $-Z_{1-\alpha/2}$  and  $Z_{1-\alpha/2}$  is  $(1-\alpha/2)$  % (e.g.  $Z_{95} = 1.96$  and  $Z_{99} = 2.58$ ).  $\ln(\text{SMR})$  represents the natural logarithm of SMR. Observed represents the observed number of deaths in cancer patients.

## REFERENCES

1. Hall DJ. Standardization and life tables. *Islamic World Medical Journal*. 1984; 14:22–25.
2. Naing NN. Easy way to learn standardization: direct and indirect methods. *Malays J Med Sci*. 2000; 7:10–15. PMID:[22844209](#)
3. Rothman KJ, Greenland S, Lash TL. (2008). *Modern Epidemiology*. (Philadelphia, PA: Lippincott Williams & Wilkins).
4. Ulm K. A simple method to calculate the confidence interval of a standardized mortality ratio (SMR). *Am J Epidemiol*. 1990; 131:373–75.

<https://doi.org/10.1093/oxfordjournals.aje.a115507>

PMID:[2296988](https://pubmed.ncbi.nlm.nih.gov/2296988/)

5. Cortopassi F, Gurung P, Pinto-Plata V. Chronic Obstructive Pulmonary Disease in Elderly Patients. *Clin Geriatr Med*. 2017; 33:539–52.  
<https://doi.org/10.1016/j.cger.2017.06.006>  
PMID:[28991649](https://pubmed.ncbi.nlm.nih.gov/28991649/)
6. Surveillance, Epidemiology, and End Results Program. Race recode changes for the 1973–2005 SEER research data (November 2007 submission) and later releases. [https://seer.cancer.gov/seerstat/variables/seer/race\\_ethnicity/](https://seer.cancer.gov/seerstat/variables/seer/race_ethnicity/). Published March 2017. Accessed July 15, 2019.

## Supplementary Figures

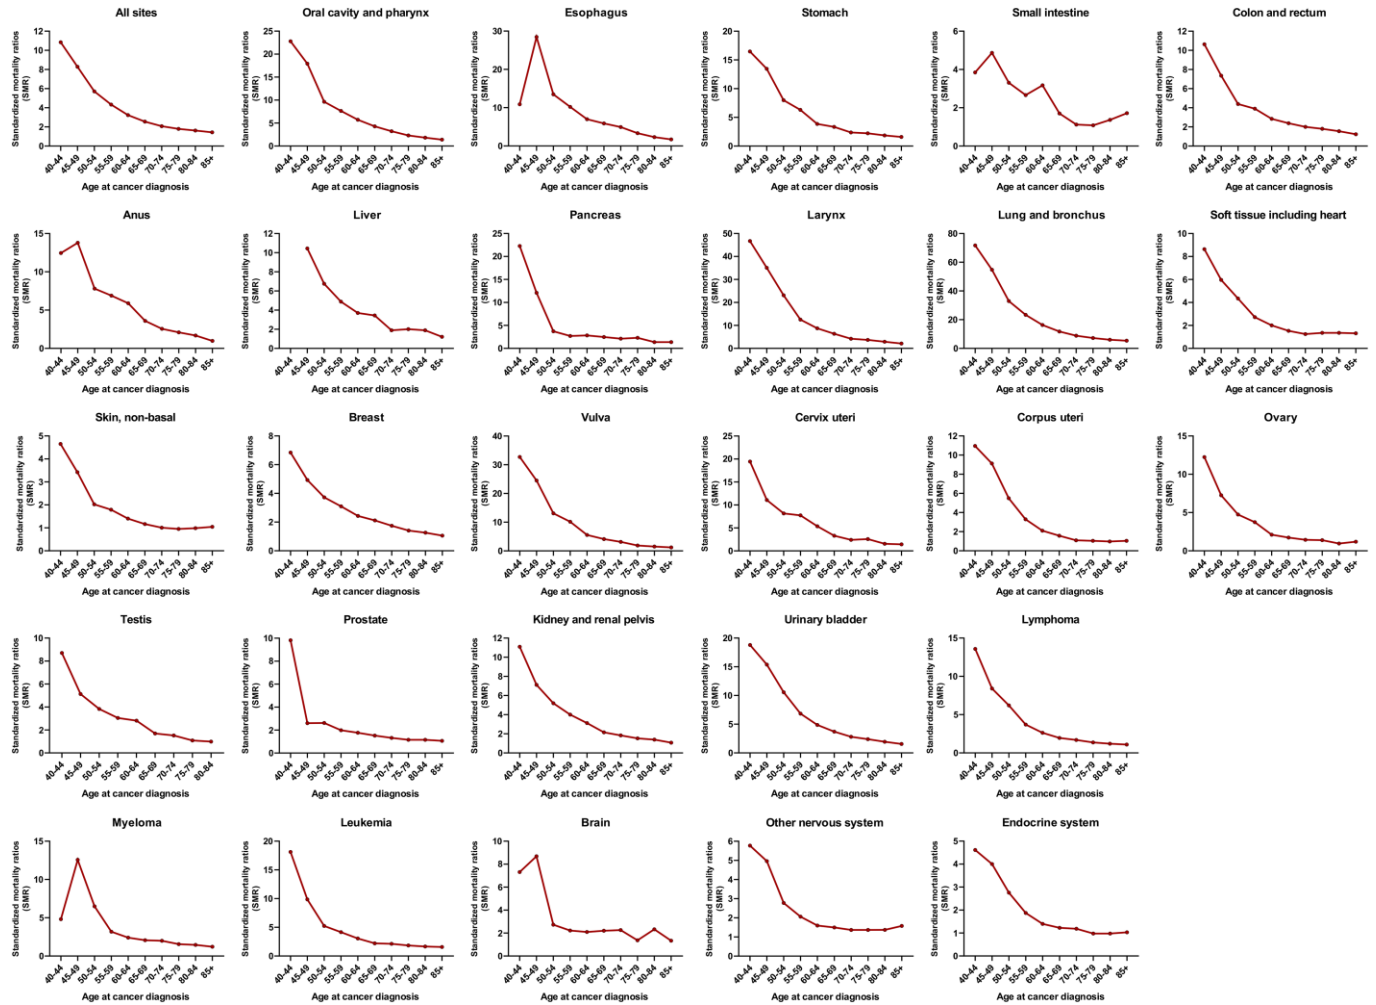

Supplementary Figure 1. Trends of COPD mortality among patients diagnosed cancer in SEER 18 registries by age at cancer diagnosis and anatomic sites.

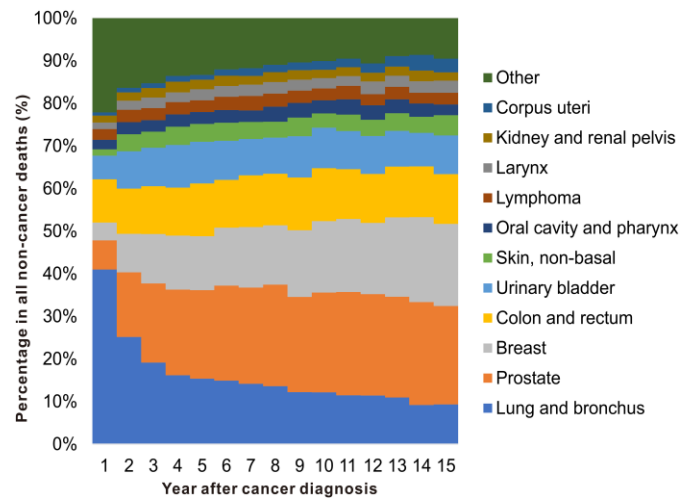

Supplementary Figure 2. Site distribution of COPD deaths among patients diagnosed with cancer in SEER 18 registries by time after diagnosis.



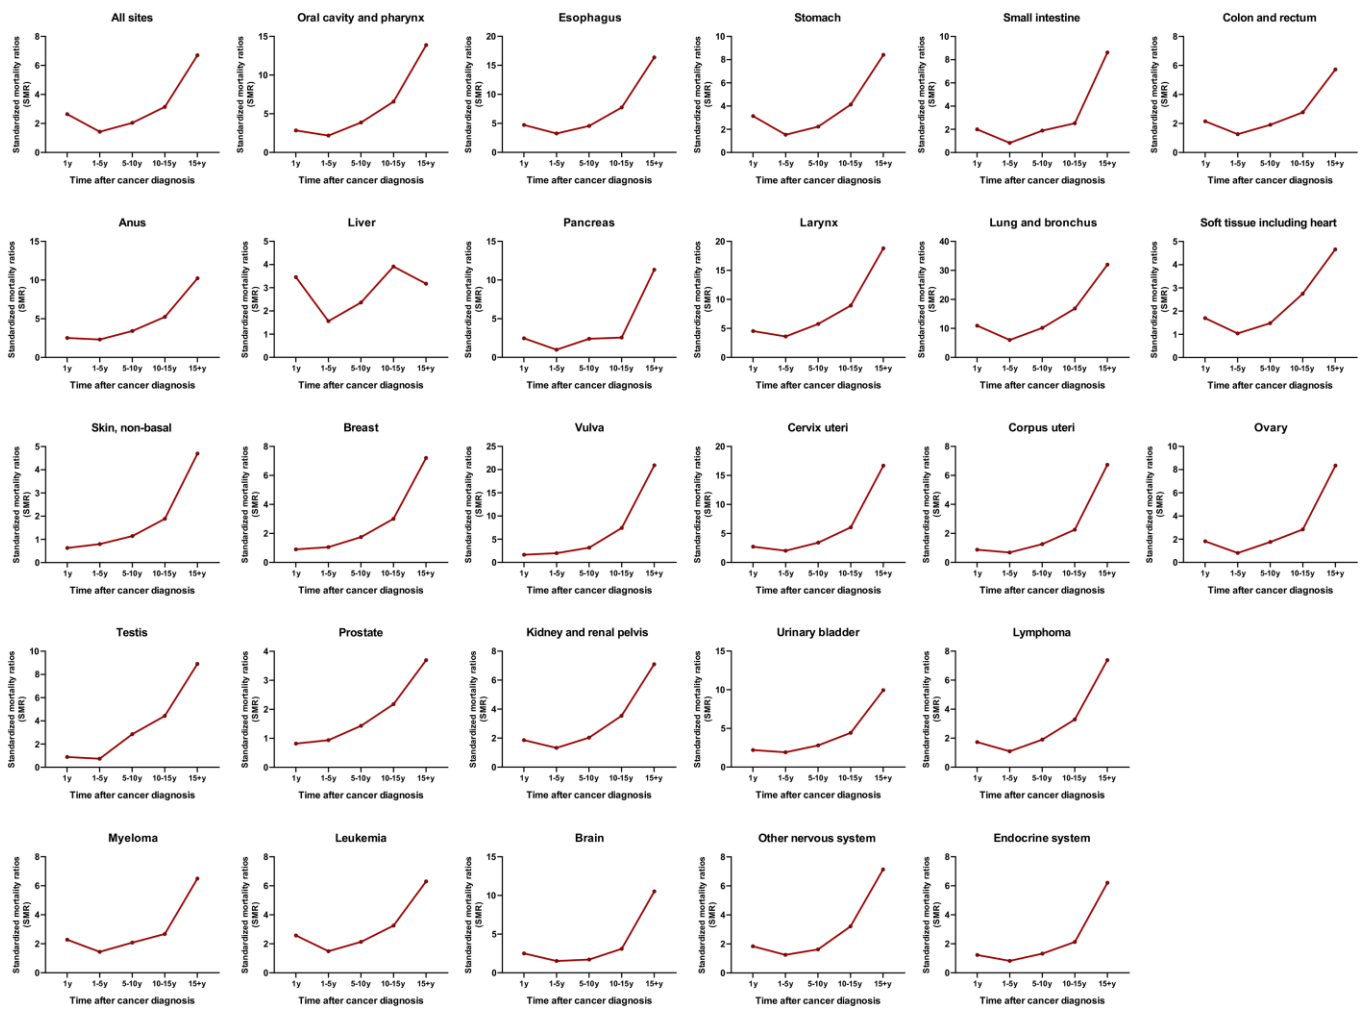

Supplementary Figure 3. Trends of COPD mortality among patients diagnosed cancer in SEER 18 registries by time from cancer diagnosis and anatomic sites.

## Supplementary Tables

**Supplementary Table 1. Non-cancer causes of death among patients diagnosed with cancer between 1975 and 2016 in SEER 18 registries.**

| Cause of death                                              | No. of deaths | Percentage |
|-------------------------------------------------------------|---------------|------------|
| Total                                                       | 1,436,158     | 100%       |
| Diseases of heart                                           | 543,917       | 37.87%     |
| Chronic obstructive pulmonary disease and allied conditions | 119,228       | 8.30%      |
| Cerebrovascular diseases                                    | 116,642       | 8.12%      |
| Pneumonia and influenza                                     | 61,056        | 4.25%      |
| Alzheimer's                                                 | 51,087        | 3.56%      |
| Diabetes mellitus                                           | 47,823        | 3.33%      |
| Other infectious and parasitic diseases including HIV       | 40,991        | 2.85%      |
| Accidents and adverse effects                               | 33,671        | 2.34%      |
| Nephritis, nephrotic syndrome and nephrosis                 | 30,666        | 2.14%      |
| Septicemia                                                  | 28,166        | 1.96%      |
| Chronic liver disease and cirrhosis                         | 20,052        | 1.40%      |
| Hypertension without heart disease                          | 19,984        | 1.39%      |
| Symptoms, signs and ill-defined conditions                  | 19,213        | 1.34%      |
| Suicide and self-inflicted injury                           | 11,956        | 0.83%      |
| Atherosclerosis                                             | 11,659        | 0.81%      |
| Aortic aneurysm and dissection                              | 10,017        | 0.70%      |
| Other diseases of arteries, arterioles, capillaries         | 7,549         | 0.53%      |
| Stomach and duodenal ulcers                                 | 4,651         | 0.32%      |
| Congenital anomalies                                        | 1,790         | 0.12%      |
| Homicide and legal intervention                             | 1,209         | 0.08%      |
| Tuberculosis                                                | 690           | 0.05%      |
| Complications of pregnancy, childbirth, puerperium          | 214           | 0.01%      |
| Certain conditions originating in perinatal period          | 61            | 0.004%     |
| Syphilis                                                    | 25            | 0.002%     |
| Other cause of death                                        | 253,841       | 17.68%     |

**Supplementary Table 2. Non-cancer causes of death among patients diagnosed with lung cancer between 1975 and 2016 in SEER 18 registries.**

| Cause of death                                              | No. of deaths | Percentage |
|-------------------------------------------------------------|---------------|------------|
| Total                                                       | 110,404       | 100%       |
| Diseases of heart                                           | 39,306        | 35.60%     |
| Chronic obstructive pulmonary disease and allied conditions | 23,516        | 21.30%     |
| Cerebrovascular diseases                                    | 6,810         | 6.17%      |
| Pneumonia and influenza                                     | 5,279         | 4.78%      |
| Accidents and adverse effects                               | 2,632         | 2.38%      |
| Septicemia                                                  | 2,285         | 2.07%      |
| Diabetes mellitus                                           | 2,149         | 1.95%      |
| Other infectious and parasitic diseases including HIV       | 1,758         | 1.59%      |
| Symptoms, signs and ill-defined conditions                  | 1,747         | 1.58%      |
| Nephritis, nephrotic syndrome and nephrosis                 | 1,647         | 1.49%      |
| Alzheimer's                                                 | 1,438         | 1.30%      |

|                                                     |        |        |
|-----------------------------------------------------|--------|--------|
| Suicide and self-inflicted injury                   | 1,236  | 1.12%  |
| Hypertension without heart disease                  | 1,011  | 0.92%  |
| Aortic aneurysm and dissection                      | 987    | 0.89%  |
| Chronic liver disease and cirrhosis                 | 908    | 0.82%  |
| Atherosclerosis                                     | 688    | 0.62%  |
| Other diseases of arteries, arterioles, capillaries | 587    | 0.53%  |
| Stomach and duodenal ulcers                         | 472    | 0.43%  |
| Tuberculosis                                        | 111    | 0.10%  |
| Congenital anomalies                                | 103    | 0.09%  |
| Homicide and legal intervention                     | 73     | 0.07%  |
| Complications of pregnancy, childbirth, puerperium  | 30     | 0.03%  |
| Certain conditions originating in perinatal period  | 15     | 0.01%  |
| Syphilis                                            | 2      | 0.002% |
| Other cause of death                                | 15,614 | 14.14% |

---

Please browse Full Text version to see the data of Supplementary Tables 3 and 4.

**Supplementary Table 3. COPD mortality in US general population by age at diagnosis, sex, race and calendar year of diagnosis.**

**Supplementary Table 4. COPD mortality in all patients with cancer by age at diagnosis, sex, race and calendar year of diagnosis.**
