# Supplementary material for: Deaths from COPD in patients with cancer: a population-based study
Source: PubMed Central journal article supplement (PMC8148461; doi:10.18632/aging.202939), 2021-04-27
Supplement: aging-13-202939-s003.pdf [file aging-13-202939-s003.pdf]

## SUPPLEMENTARY TABLES

**Supplementary Table 1. Non-cancer causes of death among patients diagnosed with cancer between 1975 and 2016 in SEER 18 registries.**

| Cause of death                                              | No. of deaths | Percentage |
|-------------------------------------------------------------|---------------|------------|
| Total                                                       | 1,436,158     | 100%       |
| Diseases of heart                                           | 543,917       | 37.87%     |
| Chronic obstructive pulmonary disease and allied conditions | 119,228       | 8.30%      |
| Cerebrovascular diseases                                    | 116,642       | 8.12%      |
| Pneumonia and influenza                                     | 61,056        | 4.25%      |
| Alzheimer's                                                 | 51,087        | 3.56%      |
| Diabetes mellitus                                           | 47,823        | 3.33%      |
| Other infectious and parasitic diseases including HIV       | 40,991        | 2.85%      |
| Accidents and adverse effects                               | 33,671        | 2.34%      |
| Nephritis, nephrotic syndrome and nephrosis                 | 30,666        | 2.14%      |
| Septicemia                                                  | 28,166        | 1.96%      |
| Chronic liver disease and cirrhosis                         | 20,052        | 1.40%      |
| Hypertension without heart disease                          | 19,984        | 1.39%      |
| Symptoms, signs and ill-defined conditions                  | 19,213        | 1.34%      |
| Suicide and self-inflicted injury                           | 11,956        | 0.83%      |
| Atherosclerosis                                             | 11,659        | 0.81%      |
| Aortic aneurysm and dissection                              | 10,017        | 0.70%      |
| Other diseases of arteries, arterioles, capillaries         | 7,549         | 0.53%      |
| Stomach and duodenal ulcers                                 | 4,651         | 0.32%      |
| Congenital anomalies                                        | 1,790         | 0.12%      |
| Homicide and legal intervention                             | 1,209         | 0.08%      |
| Tuberculosis                                                | 690           | 0.05%      |
| Complications of pregnancy, childbirth, puerperium          | 214           | 0.01%      |
| Certain conditions originating in perinatal period          | 61            | 0.004%     |
| Syphilis                                                    | 25            | 0.002%     |
| Other cause of death                                        | 253,841       | 17.68%     |

**Supplementary Table 2. Non-cancer causes of death among patients diagnosed with lung cancer between 1975 and 2016 in SEER 18 registries.**

| Cause of death                                              | No. of deaths | Percentage |
|-------------------------------------------------------------|---------------|------------|
| Total                                                       | 110,404       | 100%       |
| Diseases of heart                                           | 39,306        | 35.60%     |
| Chronic obstructive pulmonary disease and allied conditions | 23,516        | 21.30%     |
| Cerebrovascular diseases                                    | 6,810         | 6.17%      |
| Pneumonia and influenza                                     | 5,279         | 4.78%      |
| Accidents and adverse effects                               | 2,632         | 2.38%      |
| Septicemia                                                  | 2,285         | 2.07%      |
| Diabetes mellitus                                           | 2,149         | 1.95%      |
| Other infectious and parasitic diseases including HIV       | 1,758         | 1.59%      |
| Symptoms, signs and ill-defined conditions                  | 1,747         | 1.58%      |
| Nephritis, nephrotic syndrome and nephrosis                 | 1,647         | 1.49%      |
| Alzheimer's                                                 | 1,438         | 1.30%      |

|                                                     |        |        |
|-----------------------------------------------------|--------|--------|
| Suicide and self-inflicted injury                   | 1,236  | 1.12%  |
| Hypertension without heart disease                  | 1,011  | 0.92%  |
| Aortic aneurysm and dissection                      | 987    | 0.89%  |
| Chronic liver disease and cirrhosis                 | 908    | 0.82%  |
| Atherosclerosis                                     | 688    | 0.62%  |
| Other diseases of arteries, arterioles, capillaries | 587    | 0.53%  |
| Stomach and duodenal ulcers                         | 472    | 0.43%  |
| Tuberculosis                                        | 111    | 0.10%  |
| Congenital anomalies                                | 103    | 0.09%  |
| Homicide and legal intervention                     | 73     | 0.07%  |
| Complications of pregnancy, childbirth, puerperium  | 30     | 0.03%  |
| Certain conditions originating in perinatal period  | 15     | 0.01%  |
| Syphilis                                            | 2      | 0.002% |
| Other cause of death                                | 15,614 | 14.14% |

---

Please browse Full Text version to see the data of Supplementary Tables 3 and 4.

**Supplementary Table 3. COPD mortality in US general population by age at diagnosis, sex, race and calendar year of diagnosis.**

**Supplementary Table 4. COPD mortality in all patients with cancer by age at diagnosis, sex, race and calendar year of diagnosis.**
