# Supplementary material for: Deaths from COPD in patients with cancer: a population-based study
Source: PubMed Central journal article supplement (PMC8148461; doi:10.18632/aging.202939), 2021-04-27
Supplement: aging-13-202939-s004.pdf [file aging-13-202939-s004.pdf]

**Supplementary Table 3.** COPD mortality in US general population by age at diagnosis, sex, race and calendar year of diagnosis.

| Age at diagnosis | Sex             | Race      | Calendar year of diagnosis | Mortality rates (per 100,000 person-years) | No. of deaths from COPD | Population |
|------------------|-----------------|-----------|----------------------------|--------------------------------------------|-------------------------|------------|
| 00 years         | Male and female | All races | 1975-1979                  | 2.4                                        | 388                     | 16,306,151 |
| 00 years         | Male and female | All races | 1980-1984                  | 1.6                                        | 287                     | 18,033,145 |
| 00 years         | Male and female | All races | 1985-1989                  | 1.4                                        | 268                     | 18,697,186 |
| 00 years         | Male and female | All races | 1990-1994                  | 1.4                                        | 266                     | 19,694,347 |
| 00 years         | Male and female | All races | 1995-1999                  | 1.1                                        | 206                     | 18,846,097 |
| 00 years         | Male and female | All races | 2000-2004                  | 0.9                                        | 182                     | 19,810,204 |
| 00 years         | Male and female | All races | 2005-2009                  | 0.8                                        | 165                     | 20,330,450 |
| 00 years         | Male and female | All races | 2010-2016                  | 0.7                                        | 186                     | 27,666,515 |
| 00 years         | Male and female | White     | 1975-1979                  | 2.0                                        | 275                     | 13,501,735 |
| 00 years         | Male and female | White     | 1980-1984                  | 1.3                                        | 189                     | 14,719,150 |
| 00 years         | Male and female | White     | 1985-1989                  | 1.2                                        | 182                     | 15,029,517 |
| 00 years         | Male and female | White     | 1990-1994                  | 1.1                                        | 165                     | 15,562,635 |
| 00 years         | Male and female | White     | 1995-1999                  | 0.8                                        | 113                     | 14,876,288 |
| 00 years         | Male and female | White     | 2000-2004                  | 0.8                                        | 116                     | 15,397,897 |
| 00 years         | Male and female | White     | 2005-2009                  | 0.6                                        | 95                      | 15,451,285 |
| 00 years         | Male and female | White     | 2010-2016                  | 0.5                                        | 104                     | 20,758,459 |
| 00 years         | Male and female | Black     | 1975-1979                  | 4.1                                        | 99                      | 2,393,131  |
| 00 years         | Male and female | Black     | 1980-1984                  | 3.4                                        | 91                      | 2,688,294  |
| 00 years         | Male and female | Black     | 1985-1989                  | 2.6                                        | 74                      | 2,880,836  |
| 00 years         | Male and female | Black     | 1990-1994                  | 2.9                                        | 93                      | 3,157,537  |
| 00 years         | Male and female | Black     | 1995-1999                  | 2.8                                        | 83                      | 2,944,800  |
| 00 years         | Male and female | Black     | 2000-2004                  | 1.9                                        | 61                      | 3,142,168  |
| 00 years         | Male and female | Black     | 2005-2009                  | 1.7                                        | 59                      | 3,387,505  |
| 00 years         | Male and female | Black     | 2010-2016                  | 1.4                                        | 68                      | 4,721,339  |
| 00 years         | Male and female | Other     | 1975-1979                  | 3.4                                        | 14                      | 411,285    |
| 00 years         | Male and female | Other     | 1980-1984                  | 0.0                                        | 0                       | 625,701    |
| 00 years         | Male and female | Other     | 1985-1989                  | 1.5                                        | 12                      | 786,833    |
| 00 years         | Male and female | Other     | 1990-1994                  | 0.0                                        | 0                       | 974,175    |
| 00 years         | Male and female | Other     | 1995-1999                  | 1.0                                        | 10                      | 1,025,009  |
| 00 years         | Male and female | Other     | 2000-2004                  | 0.0                                        | 0                       | 1,270,139  |
| 00 years         | Male and female | Other     | 2005-2009                  | 0.7                                        | 11                      | 1,491,660  |
| 00 years         | Male and female | Other     | 2010-2016                  | 0.6                                        | 14                      | 2,186,717  |
| 00 years         | Male            | All races | 1975-1979                  | 3.0                                        | 248                     | 8,344,898  |
| 00 years         | Male            | All races | 1980-1984                  | 2.0                                        | 180                     | 9,225,369  |
| 00 years         | Male            | All races | 1985-1989                  | 1.9                                        | 182                     | 9,565,111  |
| 00 years         | Male            | All races | 1990-1994                  | 1.6                                        | 163                     | 10,078,032 |

|          |        |           |           |     |     |            |
|----------|--------|-----------|-----------|-----|-----|------------|
| 00 years | Male   | All races | 1995-1999 | 1.3 | 128 | 9,651,025  |
| 00 years | Male   | All races | 2000-2004 | 1.1 | 115 | 10,127,688 |
| 00 years | Male   | All races | 2005-2009 | 1.0 | 103 | 10,388,610 |
| 00 years | Male   | All races | 2010-2016 | 0.9 | 123 | 14,148,332 |
| 00 years | Male   | White     | 1975-1979 | 2.6 | 177 | 6,927,665  |
| 00 years | Male   | White     | 1980-1984 | 1.6 | 118 | 7,553,162  |
| 00 years | Male   | White     | 1985-1989 | 1.7 | 130 | 7,709,086  |
| 00 years | Male   | White     | 1990-1994 | 1.3 | 100 | 7,982,023  |
| 00 years | Male   | White     | 1995-1999 | 1.0 | 74  | 7,633,307  |
| 00 years | Male   | White     | 2000-2004 | 1.0 | 78  | 7,881,308  |
| 00 years | Male   | White     | 2005-2009 | 0.7 | 55  | 7,905,435  |
| 00 years | Male   | White     | 2010-2016 | 0.6 | 67  | 10,624,492 |
| 00 years | Male   | Black     | 1975-1979 | 5.3 | 64  | 1,207,966  |
| 00 years | Male   | Black     | 1980-1984 | 4.2 | 57  | 1,353,955  |
| 00 years | Male   | Black     | 1985-1989 | 3.0 | 44  | 1,454,048  |
| 00 years | Male   | Black     | 1990-1994 | 3.6 | 57  | 1,597,902  |
| 00 years | Male   | Black     | 1995-1999 | 3.4 | 50  | 1,492,176  |
| 00 years | Male   | Black     | 2000-2004 | 2.1 | 33  | 1,596,625  |
| 00 years | Male   | Black     | 2005-2009 | 2.4 | 41  | 1,720,349  |
| 00 years | Male   | Black     | 2010-2016 | 1.8 | 43  | 2,402,525  |
| 00 years | Male   | Other     | 1975-1979 | 0.0 | 0   | 209,267    |
| 00 years | Male   | Other     | 1980-1984 | 0.0 | 0   | 318,252    |
| 00 years | Male   | Other     | 1985-1989 | 0.0 | 0   | 401,977    |
| 00 years | Male   | Other     | 1990-1994 | 0.0 | 0   | 498,107    |
| 00 years | Male   | Other     | 1995-1999 | 0.0 | 0   | 525,542    |
| 00 years | Male   | Other     | 2000-2004 | 0.0 | 0   | 649,755    |
| 00 years | Male   | Other     | 2005-2009 | 0.0 | 0   | 762,826    |
| 00 years | Male   | Other     | 2010-2016 | 1.2 | 13  | 1,121,315  |
| 00 years | Female | All races | 1975-1979 | 1.8 | 140 | 7,961,253  |
| 00 years | Female | All races | 1980-1984 | 1.2 | 107 | 8,807,776  |
| 00 years | Female | All races | 1985-1989 | 0.9 | 86  | 9,132,075  |
| 00 years | Female | All races | 1990-1994 | 1.1 | 103 | 9,616,315  |
| 00 years | Female | All races | 1995-1999 | 0.8 | 78  | 9,195,072  |
| 00 years | Female | All races | 2000-2004 | 0.7 | 67  | 9,682,516  |
| 00 years | Female | All races | 2005-2009 | 0.6 | 62  | 9,941,840  |
| 00 years | Female | All races | 2010-2016 | 0.5 | 63  | 13,518,183 |
| 00 years | Female | White     | 1975-1979 | 1.5 | 98  | 6,574,070  |
| 00 years | Female | White     | 1980-1984 | 1.0 | 71  | 7,165,988  |
| 00 years | Female | White     | 1985-1989 | 0.7 | 52  | 7,320,431  |
| 00 years | Female | White     | 1990-1994 | 0.9 | 65  | 7,580,612  |
| 00 years | Female | White     | 1995-1999 | 0.5 | 39  | 7,242,981  |
| 00 years | Female | White     | 2000-2004 | 0.5 | 38  | 7,516,589  |
| 00 years | Female | White     | 2005-2009 | 0.5 | 40  | 7,545,850  |

|             |                 |           |           |     |     |             |
|-------------|-----------------|-----------|-----------|-----|-----|-------------|
| 00 years    | Female          | White     | 2010-2016 | 0.4 | 37  | 10,133,967  |
| 00 years    | Female          | Black     | 1975-1979 | 3.0 | 35  | 1,185,165   |
| 00 years    | Female          | Black     | 1980-1984 | 2.5 | 34  | 1,334,339   |
| 00 years    | Female          | Black     | 1985-1989 | 2.1 | 30  | 1,426,788   |
| 00 years    | Female          | Black     | 1990-1994 | 2.3 | 36  | 1,559,635   |
| 00 years    | Female          | Black     | 1995-1999 | 2.3 | 33  | 1,452,624   |
| 00 years    | Female          | Black     | 2000-2004 | 1.8 | 28  | 1,545,543   |
| 00 years    | Female          | Black     | 2005-2009 | 1.1 | 18  | 1,667,156   |
| 00 years    | Female          | Black     | 2010-2016 | 1.1 | 25  | 2,318,814   |
| 00 years    | Female          | Other     | 1975-1979 | 0.0 | 0   | 202,018     |
| 00 years    | Female          | Other     | 1980-1984 | 0.0 | 0   | 307,449     |
| 00 years    | Female          | Other     | 1985-1989 | 0.0 | 0   | 384,856     |
| 00 years    | Female          | Other     | 1990-1994 | 0.0 | 0   | 476,068     |
| 00 years    | Female          | Other     | 1995-1999 | 0.0 | 0   | 499,467     |
| 00 years    | Female          | Other     | 2000-2004 | 0.0 | 0   | 620,384     |
| 00 years    | Female          | Other     | 2005-2009 | 0.0 | 0   | 728,834     |
| 00 years    | Female          | Other     | 2010-2016 | 0.0 | 0   | 1,065,402   |
| 01-04 years | Male and female | All races | 1975-1979 | 0.5 | 301 | 62,826,784  |
| 01-04 years | Male and female | All races | 1980-1984 | 0.4 | 253 | 67,780,270  |
| 01-04 years | Male and female | All races | 1985-1989 | 0.3 | 218 | 71,862,312  |
| 01-04 years | Male and female | All races | 1990-1994 | 0.3 | 264 | 77,404,324  |
| 01-04 years | Male and female | All races | 1995-1999 | 0.3 | 232 | 77,701,818  |
| 01-04 years | Male and female | All races | 2000-2004 | 0.3 | 262 | 77,473,829  |
| 01-04 years | Male and female | All races | 2005-2009 | 0.3 | 276 | 80,167,440  |
| 01-04 years | Male and female | All races | 2010-2016 | 0.3 | 363 | 112,174,133 |
| 01-04 years | Male and female | White     | 1975-1979 | 0.4 | 213 | 51,859,143  |
| 01-04 years | Male and female | White     | 1980-1984 | 0.3 | 149 | 55,260,254  |
| 01-04 years | Male and female | White     | 1985-1989 | 0.2 | 139 | 57,985,768  |
| 01-04 years | Male and female | White     | 1990-1994 | 0.2 | 134 | 61,142,729  |
| 01-04 years | Male and female | White     | 1995-1999 | 0.2 | 117 | 60,715,402  |
| 01-04 years | Male and female | White     | 2000-2004 | 0.2 | 124 | 60,169,051  |
| 01-04 years | Male and female | White     | 2005-2009 | 0.2 | 131 | 61,405,358  |
| 01-04 years | Male and female | White     | 2010-2016 | 0.2 | 166 | 84,136,965  |
| 01-04 years | Male and female | Black     | 1975-1979 | 0.9 | 82  | 9,345,966   |
| 01-04 years | Male and female | Black     | 1980-1984 | 1.0 | 97  | 10,185,424  |
| 01-04 years | Male and female | Black     | 1985-1989 | 0.7 | 74  | 10,813,686  |
| 01-04 years | Male and female | Black     | 1990-1994 | 0.9 | 117 | 12,526,173  |
| 01-04 years | Male and female | Black     | 1995-1999 | 0.8 | 101 | 12,754,577  |
| 01-04 years | Male and female | Black     | 2000-2004 | 1.0 | 122 | 12,474,033  |
| 01-04 years | Male and female | Black     | 2005-2009 | 1.0 | 131 | 12,950,678  |
| 01-04 years | Male and female | Black     | 2010-2016 | 0.9 | 169 | 19,035,900  |
| 01-04 years | Male and female | Other     | 1975-1979 | 0.0 | 0   | 1,621,675   |
| 01-04 years | Male and female | Other     | 1980-1984 | 0.0 | 0   | 2,334,592   |

|             |                 |           |           |     |     |            |
|-------------|-----------------|-----------|-----------|-----|-----|------------|
| 01-04 years | Male and female | Other     | 1985-1989 | 0.0 | 0   | 3,062,858  |
| 01-04 years | Male and female | Other     | 1990-1994 | 0.3 | 13  | 3,735,422  |
| 01-04 years | Male and female | Other     | 1995-1999 | 0.3 | 14  | 4,231,839  |
| 01-04 years | Male and female | Other     | 2000-2004 | 0.3 | 16  | 4,830,745  |
| 01-04 years | Male and female | Other     | 2005-2009 | 0.2 | 14  | 5,811,404  |
| 01-04 years | Male and female | Other     | 2010-2016 | 0.3 | 28  | 9,001,268  |
| 01-04 years | Male            | All races | 1975-1979 | 0.6 | 178 | 32,115,668 |
| 01-04 years | Male            | All races | 1980-1984 | 0.4 | 151 | 34,662,039 |
| 01-04 years | Male            | All races | 1985-1989 | 0.3 | 116 | 36,766,042 |
| 01-04 years | Male            | All races | 1990-1994 | 0.4 | 168 | 39,608,837 |
| 01-04 years | Male            | All races | 1995-1999 | 0.4 | 144 | 39,757,266 |
| 01-04 years | Male            | All races | 2000-2004 | 0.4 | 169 | 39,604,862 |
| 01-04 years | Male            | All races | 2005-2009 | 0.4 | 160 | 40,959,583 |
| 01-04 years | Male            | All races | 2010-2016 | 0.4 | 229 | 57,318,292 |
| 01-04 years | Male            | White     | 1975-1979 | 0.5 | 127 | 26,584,490 |
| 01-04 years | Male            | White     | 1980-1984 | 0.3 | 82  | 28,341,746 |
| 01-04 years | Male            | White     | 1985-1989 | 0.2 | 73  | 29,745,100 |
| 01-04 years | Male            | White     | 1990-1994 | 0.3 | 87  | 31,356,441 |
| 01-04 years | Male            | White     | 1995-1999 | 0.2 | 64  | 31,135,325 |
| 01-04 years | Male            | White     | 2000-2004 | 0.2 | 75  | 30,825,855 |
| 01-04 years | Male            | White     | 2005-2009 | 0.2 | 77  | 31,426,329 |
| 01-04 years | Male            | White     | 2010-2016 | 0.2 | 103 | 43,043,142 |
| 01-04 years | Male            | Black     | 1975-1979 | 1.0 | 49  | 4,710,334  |
| 01-04 years | Male            | Black     | 1980-1984 | 1.3 | 66  | 5,138,116  |
| 01-04 years | Male            | Black     | 1985-1989 | 0.8 | 41  | 5,466,612  |
| 01-04 years | Male            | Black     | 1990-1994 | 1.1 | 71  | 6,340,461  |
| 01-04 years | Male            | Black     | 1995-1999 | 1.1 | 70  | 6,469,374  |
| 01-04 years | Male            | Black     | 2000-2004 | 1.4 | 86  | 6,338,277  |
| 01-04 years | Male            | Black     | 2005-2009 | 1.2 | 76  | 6,584,168  |
| 01-04 years | Male            | Black     | 2010-2016 | 1.1 | 107 | 9,682,012  |
| 01-04 years | Male            | Other     | 1975-1979 | 0.0 | 0   | 820,844    |
| 01-04 years | Male            | Other     | 1980-1984 | 0.0 | 0   | 1,182,177  |
| 01-04 years | Male            | Other     | 1985-1989 | 0.0 | 0   | 1,554,330  |
| 01-04 years | Male            | Other     | 1990-1994 | 0.5 | 10  | 1,911,935  |
| 01-04 years | Male            | Other     | 1995-1999 | 0.5 | 10  | 2,152,567  |
| 01-04 years | Male            | Other     | 2000-2004 | 0.0 | 0   | 2,440,730  |
| 01-04 years | Male            | Other     | 2005-2009 | 0.0 | 0   | 2,949,086  |
| 01-04 years | Male            | Other     | 2010-2016 | 0.4 | 19  | 4,593,138  |
| 01-04 years | Female          | All races | 1975-1979 | 0.4 | 123 | 30,711,116 |
| 01-04 years | Female          | All races | 1980-1984 | 0.3 | 102 | 33,118,231 |
| 01-04 years | Female          | All races | 1985-1989 | 0.3 | 102 | 35,096,270 |
| 01-04 years | Female          | All races | 1990-1994 | 0.3 | 96  | 37,795,487 |
| 01-04 years | Female          | All races | 1995-1999 | 0.2 | 88  | 37,944,552 |

|             |                 |           |           |     |     |             |
|-------------|-----------------|-----------|-----------|-----|-----|-------------|
| 01-04 years | Female          | All races | 2000-2004 | 0.2 | 93  | 37,868,967  |
| 01-04 years | Female          | All races | 2005-2009 | 0.3 | 116 | 39,207,857  |
| 01-04 years | Female          | All races | 2010-2016 | 0.2 | 134 | 54,855,841  |
| 01-04 years | Female          | White     | 1975-1979 | 0.3 | 86  | 25,274,653  |
| 01-04 years | Female          | White     | 1980-1984 | 0.2 | 67  | 26,918,508  |
| 01-04 years | Female          | White     | 1985-1989 | 0.2 | 66  | 28,240,668  |
| 01-04 years | Female          | White     | 1990-1994 | 0.2 | 47  | 29,786,288  |
| 01-04 years | Female          | White     | 1995-1999 | 0.2 | 53  | 29,580,077  |
| 01-04 years | Female          | White     | 2000-2004 | 0.2 | 49  | 29,343,196  |
| 01-04 years | Female          | White     | 2005-2009 | 0.2 | 54  | 29,979,029  |
| 01-04 years | Female          | White     | 2010-2016 | 0.2 | 63  | 41,093,823  |
| 01-04 years | Female          | Black     | 1975-1979 | 0.7 | 33  | 4,635,632   |
| 01-04 years | Female          | Black     | 1980-1984 | 0.6 | 31  | 5,047,308   |
| 01-04 years | Female          | Black     | 1985-1989 | 0.6 | 33  | 5,347,074   |
| 01-04 years | Female          | Black     | 1990-1994 | 0.7 | 46  | 6,185,712   |
| 01-04 years | Female          | Black     | 1995-1999 | 0.5 | 31  | 6,285,203   |
| 01-04 years | Female          | Black     | 2000-2004 | 0.6 | 36  | 6,135,756   |
| 01-04 years | Female          | Black     | 2005-2009 | 0.9 | 55  | 6,366,510   |
| 01-04 years | Female          | Black     | 2010-2016 | 0.7 | 62  | 9,353,888   |
| 01-04 years | Female          | Other     | 1975-1979 | 0.0 | 0   | 800,831     |
| 01-04 years | Female          | Other     | 1980-1984 | 0.0 | 0   | 1,152,415   |
| 01-04 years | Female          | Other     | 1985-1989 | 0.0 | 0   | 1,508,528   |
| 01-04 years | Female          | Other     | 1990-1994 | 0.0 | 0   | 1,823,487   |
| 01-04 years | Female          | Other     | 1995-1999 | 0.0 | 0   | 2,079,272   |
| 01-04 years | Female          | Other     | 2000-2004 | 0.0 | 0   | 2,390,015   |
| 01-04 years | Female          | Other     | 2005-2009 | 0.0 | 0   | 2,862,318   |
| 01-04 years | Female          | Other     | 2010-2016 | 0.0 | 0   | 4,408,130   |
| 05-09 years | Male and female | All races | 1975-1979 | 0.1 | 124 | 87,074,598  |
| 05-09 years | Male and female | All races | 1980-1984 | 0.2 | 164 | 81,011,395  |
| 05-09 years | Male and female | All races | 1985-1989 | 0.2 | 172 | 86,869,121  |
| 05-09 years | Male and female | All races | 1990-1994 | 0.2 | 200 | 92,459,615  |
| 05-09 years | Male and female | All races | 1995-1999 | 0.2 | 246 | 100,669,521 |
| 05-09 years | Male and female | All races | 2000-2004 | 0.2 | 214 | 99,584,719  |
| 05-09 years | Male and female | All races | 2005-2009 | 0.3 | 274 | 98,760,467  |
| 05-09 years | Male and female | All races | 2010-2016 | 0.3 | 478 | 143,119,956 |
| 05-09 years | Male and female | White     | 1975-1979 | 0.1 | 87  | 72,399,906  |
| 05-09 years | Male and female | White     | 1980-1984 | 0.2 | 107 | 66,066,833  |
| 05-09 years | Male and female | White     | 1985-1989 | 0.1 | 87  | 70,103,875  |
| 05-09 years | Male and female | White     | 1990-1994 | 0.1 | 95  | 73,683,911  |
| 05-09 years | Male and female | White     | 1995-1999 | 0.2 | 120 | 78,505,936  |
| 05-09 years | Male and female | White     | 2000-2004 | 0.1 | 89  | 77,064,834  |
| 05-09 years | Male and female | White     | 2005-2009 | 0.2 | 122 | 75,840,713  |
| 05-09 years | Male and female | White     | 2010-2016 | 0.2 | 170 | 108,025,255 |

|             |                 |           |           |     |     |            |
|-------------|-----------------|-----------|-----------|-----|-----|------------|
| 05-09 years | Male and female | Black     | 1975-1979 | 0.3 | 34  | 12,591,267 |
| 05-09 years | Male and female | Black     | 1980-1984 | 0.4 | 52  | 12,267,725 |
| 05-09 years | Male and female | Black     | 1985-1989 | 0.6 | 75  | 13,201,267 |
| 05-09 years | Male and female | Black     | 1990-1994 | 0.7 | 100 | 14,396,032 |
| 05-09 years | Male and female | Black     | 1995-1999 | 0.7 | 116 | 16,922,640 |
| 05-09 years | Male and female | Black     | 2000-2004 | 0.7 | 118 | 16,584,385 |
| 05-09 years | Male and female | Black     | 2005-2009 | 0.9 | 140 | 16,080,595 |
| 05-09 years | Male and female | Black     | 2010-2016 | 1.2 | 287 | 23,681,532 |
| 05-09 years | Male and female | Other     | 1975-1979 | 0.0 | 0   | 2,083,425  |
| 05-09 years | Male and female | Other     | 1980-1984 | 0.0 | 0   | 2,676,837  |
| 05-09 years | Male and female | Other     | 1985-1989 | 0.3 | 10  | 3,563,979  |
| 05-09 years | Male and female | Other     | 1990-1994 | 0.0 | 0   | 4,379,672  |
| 05-09 years | Male and female | Other     | 1995-1999 | 0.2 | 10  | 5,240,945  |
| 05-09 years | Male and female | Other     | 2000-2004 | 0.0 | 0   | 5,935,500  |
| 05-09 years | Male and female | Other     | 2005-2009 | 0.2 | 12  | 6,839,159  |
| 05-09 years | Male and female | Other     | 2010-2016 | 0.2 | 21  | 11,413,169 |
| 05-09 years | Male            | All races | 1975-1979 | 0.1 | 59  | 44,449,008 |
| 05-09 years | Male            | All races | 1980-1984 | 0.2 | 89  | 41,453,966 |
| 05-09 years | Male            | All races | 1985-1989 | 0.2 | 108 | 44,455,715 |
| 05-09 years | Male            | All races | 1990-1994 | 0.2 | 116 | 47,334,774 |
| 05-09 years | Male            | All races | 1995-1999 | 0.3 | 150 | 51,547,947 |
| 05-09 years | Male            | All races | 2000-2004 | 0.2 | 127 | 50,971,713 |
| 05-09 years | Male            | All races | 2005-2009 | 0.3 | 174 | 50,467,479 |
| 05-09 years | Male            | All races | 2010-2016 | 0.4 | 299 | 73,075,947 |
| 05-09 years | Male            | White     | 1975-1979 | 0.1 | 41  | 37,074,812 |
| 05-09 years | Male            | White     | 1980-1984 | 0.2 | 59  | 33,903,800 |
| 05-09 years | Male            | White     | 1985-1989 | 0.1 | 53  | 35,978,330 |
| 05-09 years | Male            | White     | 1990-1994 | 0.2 | 62  | 37,810,591 |
| 05-09 years | Male            | White     | 1995-1999 | 0.2 | 68  | 40,273,350 |
| 05-09 years | Male            | White     | 2000-2004 | 0.1 | 49  | 39,536,987 |
| 05-09 years | Male            | White     | 2005-2009 | 0.2 | 78  | 38,858,924 |
| 05-09 years | Male            | White     | 2010-2016 | 0.2 | 94  | 55,269,068 |
| 05-09 years | Male            | Black     | 1975-1979 | 0.2 | 15  | 6,320,141  |
| 05-09 years | Male            | Black     | 1980-1984 | 0.5 | 29  | 6,189,700  |
| 05-09 years | Male            | Black     | 1985-1989 | 0.7 | 48  | 6,669,570  |
| 05-09 years | Male            | Black     | 1990-1994 | 0.7 | 52  | 7,292,224  |
| 05-09 years | Male            | Black     | 1995-1999 | 0.9 | 74  | 8,587,748  |
| 05-09 years | Male            | Black     | 2000-2004 | 0.9 | 76  | 8,427,606  |
| 05-09 years | Male            | Black     | 2005-2009 | 1.1 | 89  | 8,171,374  |
| 05-09 years | Male            | Black     | 2010-2016 | 1.6 | 190 | 12,032,667 |
| 05-09 years | Male            | Other     | 1975-1979 | 0.0 | 0   | 1,054,055  |
| 05-09 years | Male            | Other     | 1980-1984 | 0.0 | 0   | 1,360,466  |
| 05-09 years | Male            | Other     | 1985-1989 | 0.0 | 0   | 1,807,815  |

|             |                 |           |           |     |     |             |
|-------------|-----------------|-----------|-----------|-----|-----|-------------|
| 05-09 years | Male            | Other     | 1990-1994 | 0.0 | 0   | 2,231,959   |
| 05-09 years | Male            | Other     | 1995-1999 | 0.0 | 0   | 2,686,849   |
| 05-09 years | Male            | Other     | 2000-2004 | 0.0 | 0   | 3,007,120   |
| 05-09 years | Male            | Other     | 2005-2009 | 0.0 | 0   | 3,437,181   |
| 05-09 years | Male            | Other     | 2010-2016 | 0.3 | 15  | 5,774,212   |
| 05-09 years | Female          | All races | 1975-1979 | 0.2 | 65  | 42,625,590  |
| 05-09 years | Female          | All races | 1980-1984 | 0.2 | 75  | 39,557,429  |
| 05-09 years | Female          | All races | 1985-1989 | 0.2 | 64  | 42,413,406  |
| 05-09 years | Female          | All races | 1990-1994 | 0.2 | 84  | 45,124,841  |
| 05-09 years | Female          | All races | 1995-1999 | 0.2 | 96  | 49,121,574  |
| 05-09 years | Female          | All races | 2000-2004 | 0.2 | 87  | 48,613,006  |
| 05-09 years | Female          | All races | 2005-2009 | 0.2 | 100 | 48,292,988  |
| 05-09 years | Female          | All races | 2010-2016 | 0.3 | 179 | 70,044,009  |
| 05-09 years | Female          | White     | 1975-1979 | 0.1 | 46  | 35,325,094  |
| 05-09 years | Female          | White     | 1980-1984 | 0.1 | 48  | 32,163,033  |
| 05-09 years | Female          | White     | 1985-1989 | 0.1 | 34  | 34,125,545  |
| 05-09 years | Female          | White     | 1990-1994 | 0.1 | 33  | 35,873,320  |
| 05-09 years | Female          | White     | 1995-1999 | 0.1 | 52  | 38,232,586  |
| 05-09 years | Female          | White     | 2000-2004 | 0.1 | 40  | 37,527,847  |
| 05-09 years | Female          | White     | 2005-2009 | 0.1 | 44  | 36,981,789  |
| 05-09 years | Female          | White     | 2010-2016 | 0.1 | 76  | 52,756,187  |
| 05-09 years | Female          | Black     | 1975-1979 | 0.3 | 19  | 6,271,126   |
| 05-09 years | Female          | Black     | 1980-1984 | 0.4 | 23  | 6,078,025   |
| 05-09 years | Female          | Black     | 1985-1989 | 0.4 | 27  | 6,531,697   |
| 05-09 years | Female          | Black     | 1990-1994 | 0.7 | 48  | 7,103,808   |
| 05-09 years | Female          | Black     | 1995-1999 | 0.5 | 42  | 8,334,892   |
| 05-09 years | Female          | Black     | 2000-2004 | 0.5 | 42  | 8,156,779   |
| 05-09 years | Female          | Black     | 2005-2009 | 0.6 | 51  | 7,909,221   |
| 05-09 years | Female          | Black     | 2010-2016 | 0.8 | 97  | 11,648,865  |
| 05-09 years | Female          | Other     | 1975-1979 | 0.0 | 0   | 1,029,370   |
| 05-09 years | Female          | Other     | 1980-1984 | 0.0 | 0   | 1,316,371   |
| 05-09 years | Female          | Other     | 1985-1989 | 0.0 | 0   | 1,756,164   |
| 05-09 years | Female          | Other     | 1990-1994 | 0.0 | 0   | 2,147,713   |
| 05-09 years | Female          | Other     | 1995-1999 | 0.0 | 0   | 2,554,096   |
| 05-09 years | Female          | Other     | 2000-2004 | 0.0 | 0   | 2,928,380   |
| 05-09 years | Female          | Other     | 2005-2009 | 0.0 | 0   | 3,401,978   |
| 05-09 years | Female          | Other     | 2010-2016 | 0.0 | 0   | 5,638,957   |
| 10-14 years | Male and female | All races | 1975-1979 | 0.2 | 214 | 97,636,858  |
| 10-14 years | Male and female | All races | 1980-1984 | 0.3 | 292 | 89,999,085  |
| 10-14 years | Male and female | All races | 1985-1989 | 0.5 | 384 | 83,170,387  |
| 10-14 years | Male and female | All races | 1990-1994 | 0.4 | 402 | 90,937,294  |
| 10-14 years | Male and female | All races | 1995-1999 | 0.5 | 482 | 98,281,400  |
| 10-14 years | Male and female | All races | 2000-2004 | 0.4 | 403 | 105,704,828 |

|             |                 |           |           |     |     |             |
|-------------|-----------------|-----------|-----------|-----|-----|-------------|
| 10-14 years | Male and female | All races | 2005-2009 | 0.3 | 305 | 104,453,978 |
| 10-14 years | Male and female | All races | 2010-2016 | 0.4 | 520 | 144,627,354 |
| 10-14 years | Male and female | White     | 1975-1979 | 0.2 | 156 | 81,580,676  |
| 10-14 years | Male and female | White     | 1980-1984 | 0.2 | 162 | 73,882,997  |
| 10-14 years | Male and female | White     | 1985-1989 | 0.3 | 205 | 67,010,198  |
| 10-14 years | Male and female | White     | 1990-1994 | 0.3 | 214 | 72,512,804  |
| 10-14 years | Male and female | White     | 1995-1999 | 0.3 | 232 | 77,606,043  |
| 10-14 years | Male and female | White     | 2000-2004 | 0.2 | 184 | 81,882,216  |
| 10-14 years | Male and female | White     | 2005-2009 | 0.1 | 103 | 80,024,746  |
| 10-14 years | Male and female | White     | 2010-2016 | 0.2 | 202 | 109,895,831 |
| 10-14 years | Male and female | Black     | 1975-1979 | 0.4 | 53  | 13,953,593  |
| 10-14 years | Male and female | Black     | 1980-1984 | 0.9 | 124 | 13,361,405  |
| 10-14 years | Male and female | Black     | 1985-1989 | 1.3 | 169 | 12,759,322  |
| 10-14 years | Male and female | Black     | 1990-1994 | 1.3 | 177 | 14,045,044  |
| 10-14 years | Male and female | Black     | 1995-1999 | 1.5 | 230 | 15,409,819  |
| 10-14 years | Male and female | Black     | 2000-2004 | 1.2 | 209 | 17,671,640  |
| 10-14 years | Male and female | Black     | 2005-2009 | 1.1 | 190 | 17,505,148  |
| 10-14 years | Male and female | Black     | 2010-2016 | 1.3 | 303 | 23,678,159  |
| 10-14 years | Male and female | Other     | 1975-1979 | 0.0 | 0   | 2,102,589   |
| 10-14 years | Male and female | Other     | 1980-1984 | 0.0 | 0   | 2,754,683   |
| 10-14 years | Male and female | Other     | 1985-1989 | 0.3 | 10  | 3,400,867   |
| 10-14 years | Male and female | Other     | 1990-1994 | 0.3 | 11  | 4,379,446   |
| 10-14 years | Male and female | Other     | 1995-1999 | 0.4 | 20  | 5,265,538   |
| 10-14 years | Male and female | Other     | 2000-2004 | 0.2 | 10  | 6,150,972   |
| 10-14 years | Male and female | Other     | 2005-2009 | 0.2 | 12  | 6,924,084   |
| 10-14 years | Male and female | Other     | 2010-2016 | 0.1 | 15  | 11,053,364  |
| 10-14 years | Male            | All races | 1975-1979 | 0.3 | 134 | 49,826,574  |
| 10-14 years | Male            | All races | 1980-1984 | 0.4 | 169 | 46,010,522  |
| 10-14 years | Male            | All races | 1985-1989 | 0.5 | 218 | 42,601,260  |
| 10-14 years | Male            | All races | 1990-1994 | 0.5 | 246 | 46,590,828  |
| 10-14 years | Male            | All races | 1995-1999 | 0.6 | 297 | 50,358,686  |
| 10-14 years | Male            | All races | 2000-2004 | 0.4 | 238 | 54,150,302  |
| 10-14 years | Male            | All races | 2005-2009 | 0.4 | 191 | 53,476,364  |
| 10-14 years | Male            | All races | 2010-2016 | 0.4 | 320 | 73,860,715  |
| 10-14 years | Male            | White     | 1975-1979 | 0.2 | 98  | 41,737,149  |
| 10-14 years | Male            | White     | 1980-1984 | 0.2 | 88  | 37,869,520  |
| 10-14 years | Male            | White     | 1985-1989 | 0.3 | 108 | 34,416,093  |
| 10-14 years | Male            | White     | 1990-1994 | 0.3 | 118 | 37,258,228  |
| 10-14 years | Male            | White     | 1995-1999 | 0.4 | 141 | 39,855,465  |
| 10-14 years | Male            | White     | 2000-2004 | 0.2 | 104 | 42,029,372  |
| 10-14 years | Male            | White     | 2005-2009 | 0.2 | 64  | 41,059,281  |
| 10-14 years | Male            | White     | 2010-2016 | 0.2 | 121 | 56,253,956  |
| 10-14 years | Male            | Black     | 1975-1979 | 0.5 | 33  | 7,018,443   |



|             |        |           |           |     |     |            |
|-------------|--------|-----------|-----------|-----|-----|------------|
| 10-14 years | Male   | Black     | 1980-1984 | 1.1 | 77  | 6,733,288  |
| 10-14 years | Male   | Black     | 1985-1989 | 1.6 | 101 | 6,447,716  |
| 10-14 years | Male   | Black     | 1990-1994 | 1.7 | 121 | 7,105,383  |
| 10-14 years | Male   | Black     | 1995-1999 | 1.8 | 142 | 7,817,097  |
| 10-14 years | Male   | Black     | 2000-2004 | 1.4 | 127 | 8,974,252  |
| 10-14 years | Male   | Black     | 2005-2009 | 1.4 | 122 | 8,903,587  |
| 10-14 years | Male   | Black     | 2010-2016 | 1.6 | 190 | 12,034,015 |
| 10-14 years | Male   | Other     | 1975-1979 | 0.0 | 0   | 1,070,982  |
| 10-14 years | Male   | Other     | 1980-1984 | 0.0 | 0   | 1,407,714  |
| 10-14 years | Male   | Other     | 1985-1989 | 0.0 | 0   | 1,737,451  |
| 10-14 years | Male   | Other     | 1990-1994 | 0.0 | 0   | 2,227,217  |
| 10-14 years | Male   | Other     | 1995-1999 | 0.5 | 14  | 2,686,124  |
| 10-14 years | Male   | Other     | 2000-2004 | 0.0 | 0   | 3,146,678  |
| 10-14 years | Male   | Other     | 2005-2009 | 0.0 | 0   | 3,513,496  |
| 10-14 years | Male   | Other     | 2010-2016 | 0.0 | 0   | 5,572,744  |
| 10-14 years | Female | All races | 1975-1979 | 0.2 | 80  | 47,810,284 |
| 10-14 years | Female | All races | 1980-1984 | 0.3 | 123 | 43,988,563 |
| 10-14 years | Female | All races | 1985-1989 | 0.4 | 166 | 40,569,127 |
| 10-14 years | Female | All races | 1990-1994 | 0.4 | 156 | 44,346,466 |
| 10-14 years | Female | All races | 1995-1999 | 0.4 | 185 | 47,922,714 |
| 10-14 years | Female | All races | 2000-2004 | 0.3 | 165 | 51,554,526 |
| 10-14 years | Female | All races | 2005-2009 | 0.2 | 114 | 50,977,614 |
| 10-14 years | Female | All races | 2010-2016 | 0.3 | 200 | 70,766,639 |
| 10-14 years | Female | White     | 1975-1979 | 0.1 | 58  | 39,843,527 |
| 10-14 years | Female | White     | 1980-1984 | 0.2 | 74  | 36,013,477 |
| 10-14 years | Female | White     | 1985-1989 | 0.3 | 97  | 32,594,105 |
| 10-14 years | Female | White     | 1990-1994 | 0.3 | 96  | 35,254,576 |
| 10-14 years | Female | White     | 1995-1999 | 0.2 | 91  | 37,750,578 |
| 10-14 years | Female | White     | 2000-2004 | 0.2 | 80  | 39,852,844 |
| 10-14 years | Female | White     | 2005-2009 | 0.1 | 39  | 38,965,465 |
| 10-14 years | Female | White     | 2010-2016 | 0.2 | 81  | 53,641,875 |
| 10-14 years | Female | Black     | 1975-1979 | 0.3 | 20  | 6,935,150  |
| 10-14 years | Female | Black     | 1980-1984 | 0.7 | 47  | 6,628,117  |
| 10-14 years | Female | Black     | 1985-1989 | 1.1 | 68  | 6,311,606  |
| 10-14 years | Female | Black     | 1990-1994 | 0.8 | 56  | 6,939,661  |
| 10-14 years | Female | Black     | 1995-1999 | 1.2 | 88  | 7,592,722  |
| 10-14 years | Female | Black     | 2000-2004 | 0.9 | 82  | 8,697,388  |
| 10-14 years | Female | Black     | 2005-2009 | 0.8 | 68  | 8,601,561  |
| 10-14 years | Female | Black     | 2010-2016 | 1.0 | 113 | 11,644,144 |
| 10-14 years | Female | Other     | 1975-1979 | 0.0 | 0   | 1,031,607  |
| 10-14 years | Female | Other     | 1980-1984 | 0.0 | 0   | 1,346,969  |
| 10-14 years | Female | Other     | 1985-1989 | 0.0 | 0   | 1,663,416  |
| 10-14 years | Female | Other     | 1990-1994 | 0.0 | 0   | 2,152,229  |

|             |                 |           |           |     |     |             |
|-------------|-----------------|-----------|-----------|-----|-----|-------------|
| 10-14 years | Female          | Other     | 1995-1999 | 0.0 | 0   | 2,579,414   |
| 10-14 years | Female          | Other     | 2000-2004 | 0.0 | 0   | 3,004,294   |
| 10-14 years | Female          | Other     | 2005-2009 | 0.0 | 0   | 3,410,588   |
| 10-14 years | Female          | Other     | 2010-2016 | 0.0 | 0   | 5,480,620   |
| 15-19 years | Male and female | All races | 1975-1979 | 0.3 | 293 | 106,999,880 |
| 15-19 years | Male and female | All races | 1980-1984 | 0.4 | 379 | 99,932,452  |
| 15-19 years | Male and female | All races | 1985-1989 | 0.5 | 438 | 92,869,269  |
| 15-19 years | Male and female | All races | 1990-1994 | 0.6 | 486 | 87,637,775  |
| 15-19 years | Male and female | All races | 1995-1999 | 0.6 | 544 | 96,616,183  |
| 15-19 years | Male and female | All races | 2000-2004 | 0.4 | 422 | 103,261,327 |
| 15-19 years | Male and female | All races | 2005-2009 | 0.3 | 349 | 109,765,429 |
| 15-19 years | Male and female | All races | 2010-2016 | 0.3 | 441 | 149,504,383 |
| 15-19 years | Male and female | White     | 1975-1979 | 0.2 | 199 | 90,193,835  |
| 15-19 years | Male and female | White     | 1980-1984 | 0.3 | 219 | 82,602,531  |
| 15-19 years | Male and female | White     | 1985-1989 | 0.3 | 253 | 75,502,429  |
| 15-19 years | Male and female | White     | 1990-1994 | 0.4 | 281 | 69,935,594  |
| 15-19 years | Male and female | White     | 1995-1999 | 0.4 | 307 | 76,434,331  |
| 15-19 years | Male and female | White     | 2000-2004 | 0.3 | 204 | 80,831,098  |
| 15-19 years | Male and female | White     | 2005-2009 | 0.2 | 171 | 83,998,067  |
| 15-19 years | Male and female | White     | 2010-2016 | 0.2 | 203 | 113,295,633 |
| 15-19 years | Male and female | Black     | 1975-1979 | 0.6 | 89  | 14,682,413  |
| 15-19 years | Male and female | Black     | 1980-1984 | 1.0 | 150 | 14,565,593  |
| 15-19 years | Male and female | Black     | 1985-1989 | 1.2 | 167 | 13,776,464  |
| 15-19 years | Male and female | Black     | 1990-1994 | 1.4 | 191 | 13,500,648  |
| 15-19 years | Male and female | Black     | 1995-1999 | 1.5 | 221 | 14,996,082  |
| 15-19 years | Male and female | Black     | 2000-2004 | 1.2 | 200 | 16,163,524  |
| 15-19 years | Male and female | Black     | 2005-2009 | 0.9 | 162 | 18,441,039  |
| 15-19 years | Male and female | Black     | 2010-2016 | 0.9 | 218 | 24,996,079  |
| 15-19 years | Male and female | Other     | 1975-1979 | 0.0 | 0   | 2,123,632   |
| 15-19 years | Male and female | Other     | 1980-1984 | 0.4 | 10  | 2,764,328   |
| 15-19 years | Male and female | Other     | 1985-1989 | 0.5 | 18  | 3,590,376   |
| 15-19 years | Male and female | Other     | 1990-1994 | 0.3 | 14  | 4,201,533   |
| 15-19 years | Male and female | Other     | 1995-1999 | 0.3 | 16  | 5,185,770   |
| 15-19 years | Male and female | Other     | 2000-2004 | 0.3 | 18  | 6,266,705   |
| 15-19 years | Male and female | Other     | 2005-2009 | 0.2 | 16  | 7,326,323   |
| 15-19 years | Male and female | Other     | 2010-2016 | 0.2 | 20  | 11,212,671  |
| 15-19 years | Male            | All races | 1975-1979 | 0.3 | 162 | 54,298,469  |
| 15-19 years | Male            | All races | 1980-1984 | 0.4 | 212 | 50,844,067  |
| 15-19 years | Male            | All races | 1985-1989 | 0.5 | 248 | 47,480,182  |
| 15-19 years | Male            | All races | 1990-1994 | 0.6 | 284 | 45,001,220  |
| 15-19 years | Male            | All races | 1995-1999 | 0.6 | 316 | 49,666,099  |
| 15-19 years | Male            | All races | 2000-2004 | 0.5 | 274 | 53,186,259  |
| 15-19 years | Male            | All races | 2005-2009 | 0.4 | 209 | 56,392,302  |

|             |        |           |           |     |     |            |
|-------------|--------|-----------|-----------|-----|-----|------------|
| 15-19 years | Male   | All races | 2010-2016 | 0.4 | 280 | 76,593,224 |
| 15-19 years | Male   | White     | 1975-1979 | 0.2 | 110 | 45,898,389 |
| 15-19 years | Male   | White     | 1980-1984 | 0.3 | 114 | 42,121,305 |
| 15-19 years | Male   | White     | 1985-1989 | 0.4 | 137 | 38,685,279 |
| 15-19 years | Male   | White     | 1990-1994 | 0.4 | 154 | 36,020,519 |
| 15-19 years | Male   | White     | 1995-1999 | 0.4 | 173 | 39,436,479 |
| 15-19 years | Male   | White     | 2000-2004 | 0.3 | 121 | 41,763,017 |
| 15-19 years | Male   | White     | 2005-2009 | 0.2 | 98  | 43,264,904 |
| 15-19 years | Male   | White     | 2010-2016 | 0.2 | 129 | 58,175,405 |
| 15-19 years | Male   | Black     | 1975-1979 | 0.7 | 50  | 7,314,774  |
| 15-19 years | Male   | Black     | 1980-1984 | 1.3 | 92  | 7,288,802  |
| 15-19 years | Male   | Black     | 1985-1989 | 1.5 | 101 | 6,933,407  |
| 15-19 years | Male   | Black     | 1990-1994 | 1.7 | 118 | 6,820,511  |
| 15-19 years | Male   | Black     | 1995-1999 | 1.8 | 134 | 7,580,432  |
| 15-19 years | Male   | Black     | 2000-2004 | 1.7 | 142 | 8,207,787  |
| 15-19 years | Male   | Black     | 2005-2009 | 1.1 | 100 | 9,363,700  |
| 15-19 years | Male   | Black     | 2010-2016 | 1.1 | 140 | 12,716,935 |
| 15-19 years | Male   | Other     | 1975-1979 | 0.0 | 0   | 1,085,306  |
| 15-19 years | Male   | Other     | 1980-1984 | 0.0 | 0   | 1,433,960  |
| 15-19 years | Male   | Other     | 1985-1989 | 0.5 | 10  | 1,861,496  |
| 15-19 years | Male   | Other     | 1990-1994 | 0.6 | 12  | 2,160,190  |
| 15-19 years | Male   | Other     | 1995-1999 | 0.0 | 0   | 2,649,188  |
| 15-19 years | Male   | Other     | 2000-2004 | 0.3 | 11  | 3,215,455  |
| 15-19 years | Male   | Other     | 2005-2009 | 0.3 | 11  | 3,763,698  |
| 15-19 years | Male   | Other     | 2010-2016 | 0.2 | 11  | 5,700,884  |
| 15-19 years | Female | All races | 1975-1979 | 0.2 | 131 | 52,701,411 |
| 15-19 years | Female | All races | 1980-1984 | 0.3 | 167 | 49,088,385 |
| 15-19 years | Female | All races | 1985-1989 | 0.4 | 190 | 45,389,087 |
| 15-19 years | Female | All races | 1990-1994 | 0.5 | 202 | 42,636,555 |
| 15-19 years | Female | All races | 1995-1999 | 0.5 | 228 | 46,950,084 |
| 15-19 years | Female | All races | 2000-2004 | 0.3 | 148 | 50,075,068 |
| 15-19 years | Female | All races | 2005-2009 | 0.3 | 140 | 53,373,127 |
| 15-19 years | Female | All races | 2010-2016 | 0.2 | 161 | 72,911,159 |
| 15-19 years | Female | White     | 1975-1979 | 0.2 | 89  | 44,295,446 |
| 15-19 years | Female | White     | 1980-1984 | 0.3 | 105 | 40,481,226 |
| 15-19 years | Female | White     | 1985-1989 | 0.3 | 116 | 36,817,150 |
| 15-19 years | Female | White     | 1990-1994 | 0.4 | 127 | 33,915,075 |
| 15-19 years | Female | White     | 1995-1999 | 0.4 | 134 | 36,997,852 |
| 15-19 years | Female | White     | 2000-2004 | 0.2 | 83  | 39,068,081 |
| 15-19 years | Female | White     | 2005-2009 | 0.2 | 73  | 40,733,163 |
| 15-19 years | Female | White     | 2010-2016 | 0.1 | 74  | 55,120,228 |
| 15-19 years | Female | Black     | 1975-1979 | 0.5 | 39  | 7,367,639  |
| 15-19 years | Female | Black     | 1980-1984 | 0.8 | 58  | 7,276,791  |

|             |                 |           |           |     |     |             |
|-------------|-----------------|-----------|-----------|-----|-----|-------------|
| 15-19 years | Female          | Black     | 1985-1989 | 1.0 | 66  | 6,843,057   |
| 15-19 years | Female          | Black     | 1990-1994 | 1.1 | 73  | 6,680,137   |
| 15-19 years | Female          | Black     | 1995-1999 | 1.2 | 87  | 7,415,650   |
| 15-19 years | Female          | Black     | 2000-2004 | 0.7 | 58  | 7,955,737   |
| 15-19 years | Female          | Black     | 2005-2009 | 0.7 | 62  | 9,077,339   |
| 15-19 years | Female          | Black     | 2010-2016 | 0.6 | 78  | 12,279,144  |
| 15-19 years | Female          | Other     | 1975-1979 | 0.0 | 0   | 1,038,326   |
| 15-19 years | Female          | Other     | 1980-1984 | 0.0 | 0   | 1,330,368   |
| 15-19 years | Female          | Other     | 1985-1989 | 0.0 | 0   | 1,728,880   |
| 15-19 years | Female          | Other     | 1990-1994 | 0.0 | 0   | 2,041,343   |
| 15-19 years | Female          | Other     | 1995-1999 | 0.0 | 0   | 2,536,582   |
| 15-19 years | Female          | Other     | 2000-2004 | 0.0 | 0   | 3,051,250   |
| 15-19 years | Female          | Other     | 2005-2009 | 0.0 | 0   | 3,562,625   |
| 15-19 years | Female          | Other     | 2010-2016 | 0.0 | 0   | 5,511,787   |
| 20-24 years | Male and female | All races | 1975-1979 | 0.3 | 335 | 101,309,601 |
| 20-24 years | Male and female | All races | 1980-1984 | 0.4 | 456 | 107,890,170 |
| 20-24 years | Male and female | All races | 1985-1989 | 0.5 | 496 | 101,112,146 |
| 20-24 years | Male and female | All races | 1990-1994 | 0.6 | 528 | 95,218,801  |
| 20-24 years | Male and female | All races | 1995-1999 | 0.6 | 588 | 90,845,467  |
| 20-24 years | Male and female | All races | 2000-2004 | 0.5 | 501 | 100,554,966 |
| 20-24 years | Male and female | All races | 2005-2009 | 0.4 | 449 | 105,638,823 |
| 20-24 years | Male and female | All races | 2010-2016 | 0.5 | 762 | 157,229,485 |
| 20-24 years | Male and female | White     | 1975-1979 | 0.3 | 229 | 86,573,613  |
| 20-24 years | Male and female | White     | 1980-1984 | 0.3 | 295 | 90,823,158  |
| 20-24 years | Male and female | White     | 1985-1989 | 0.3 | 288 | 83,428,189  |
| 20-24 years | Male and female | White     | 1990-1994 | 0.4 | 304 | 76,923,523  |
| 20-24 years | Male and female | White     | 1995-1999 | 0.5 | 333 | 71,979,046  |
| 20-24 years | Male and female | White     | 2000-2004 | 0.4 | 285 | 78,833,620  |
| 20-24 years | Male and female | White     | 2005-2009 | 0.3 | 220 | 81,791,364  |
| 20-24 years | Male and female | White     | 2010-2016 | 0.3 | 413 | 118,357,532 |
| 20-24 years | Male and female | Black     | 1975-1979 | 0.8 | 96  | 12,552,646  |
| 20-24 years | Male and female | Black     | 1980-1984 | 1.1 | 149 | 14,095,378  |
| 20-24 years | Male and female | Black     | 1985-1989 | 1.4 | 195 | 13,914,768  |
| 20-24 years | Male and female | Black     | 1990-1994 | 1.5 | 206 | 13,474,448  |
| 20-24 years | Male and female | Black     | 1995-1999 | 1.8 | 235 | 13,351,183  |
| 20-24 years | Male and female | Black     | 2000-2004 | 1.3 | 198 | 14,960,345  |
| 20-24 years | Male and female | Black     | 2005-2009 | 1.4 | 218 | 16,023,445  |
| 20-24 years | Male and female | Black     | 2010-2016 | 1.2 | 311 | 26,092,381  |
| 20-24 years | Male and female | Other     | 1975-1979 | 0.5 | 10  | 2,183,342   |
| 20-24 years | Male and female | Other     | 1980-1984 | 0.4 | 12  | 2,971,634   |
| 20-24 years | Male and female | Other     | 1985-1989 | 0.3 | 13  | 3,769,189   |
| 20-24 years | Male and female | Other     | 1990-1994 | 0.4 | 18  | 4,820,830   |
| 20-24 years | Male and female | Other     | 1995-1999 | 0.4 | 20  | 5,515,238   |

|             |                 |           |           |     |     |            |
|-------------|-----------------|-----------|-----------|-----|-----|------------|
| 20-24 years | Male and female | Other     | 2000-2004 | 0.3 | 18  | 6,761,001  |
| 20-24 years | Male and female | Other     | 2005-2009 | 0.1 | 11  | 7,824,014  |
| 20-24 years | Male and female | Other     | 2010-2016 | 0.3 | 38  | 12,779,572 |
| 20-24 years | Male            | All races | 1975-1979 | 0.4 | 187 | 50,641,852 |
| 20-24 years | Male            | All races | 1980-1984 | 0.5 | 257 | 54,149,373 |
| 20-24 years | Male            | All races | 1985-1989 | 0.5 | 269 | 51,178,547 |
| 20-24 years | Male            | All races | 1990-1994 | 0.6 | 301 | 48,459,100 |
| 20-24 years | Male            | All races | 1995-1999 | 0.8 | 355 | 46,308,414 |
| 20-24 years | Male            | All races | 2000-2004 | 0.6 | 289 | 51,327,593 |
| 20-24 years | Male            | All races | 2005-2009 | 0.5 | 276 | 54,108,091 |
| 20-24 years | Male            | All races | 2010-2016 | 0.6 | 505 | 80,480,998 |
| 20-24 years | Male            | White     | 1975-1979 | 0.3 | 126 | 43,563,342 |
| 20-24 years | Male            | White     | 1980-1984 | 0.4 | 164 | 45,870,936 |
| 20-24 years | Male            | White     | 1985-1989 | 0.3 | 143 | 42,454,559 |
| 20-24 years | Male            | White     | 1990-1994 | 0.4 | 157 | 39,380,166 |
| 20-24 years | Male            | White     | 1995-1999 | 0.5 | 187 | 36,992,098 |
| 20-24 years | Male            | White     | 2000-2004 | 0.4 | 163 | 40,559,544 |
| 20-24 years | Male            | White     | 2005-2009 | 0.3 | 134 | 42,150,031 |
| 20-24 years | Male            | White     | 2010-2016 | 0.4 | 264 | 60,832,694 |
| 20-24 years | Male            | Black     | 1975-1979 | 0.9 | 55  | 5,976,050  |
| 20-24 years | Male            | Black     | 1980-1984 | 1.3 | 88  | 6,767,045  |
| 20-24 years | Male            | Black     | 1985-1989 | 1.7 | 118 | 6,771,490  |
| 20-24 years | Male            | Black     | 1990-1994 | 2.0 | 131 | 6,594,542  |
| 20-24 years | Male            | Black     | 1995-1999 | 2.4 | 155 | 6,515,010  |
| 20-24 years | Male            | Black     | 2000-2004 | 1.5 | 113 | 7,350,157  |
| 20-24 years | Male            | Black     | 2005-2009 | 1.7 | 137 | 7,974,354  |
| 20-24 years | Male            | Black     | 2010-2016 | 1.6 | 216 | 13,129,229 |
| 20-24 years | Male            | Other     | 1975-1979 | 0.0 | 0   | 1,102,460  |
| 20-24 years | Male            | Other     | 1980-1984 | 0.0 | 0   | 1,511,392  |
| 20-24 years | Male            | Other     | 1985-1989 | 0.0 | 0   | 1,952,498  |
| 20-24 years | Male            | Other     | 1990-1994 | 0.5 | 13  | 2,484,392  |
| 20-24 years | Male            | Other     | 1995-1999 | 0.5 | 13  | 2,801,306  |
| 20-24 years | Male            | Other     | 2000-2004 | 0.4 | 13  | 3,417,892  |
| 20-24 years | Male            | Other     | 2005-2009 | 0.0 | 0   | 3,983,706  |
| 20-24 years | Male            | Other     | 2010-2016 | 0.4 | 25  | 6,519,075  |
| 20-24 years | Female          | All races | 1975-1979 | 0.3 | 148 | 50,667,749 |
| 20-24 years | Female          | All races | 1980-1984 | 0.4 | 199 | 53,740,797 |
| 20-24 years | Female          | All races | 1985-1989 | 0.5 | 227 | 49,933,599 |
| 20-24 years | Female          | All races | 1990-1994 | 0.5 | 227 | 46,759,701 |
| 20-24 years | Female          | All races | 1995-1999 | 0.5 | 233 | 44,537,053 |
| 20-24 years | Female          | All races | 2000-2004 | 0.4 | 212 | 49,227,373 |
| 20-24 years | Female          | All races | 2005-2009 | 0.3 | 173 | 51,530,732 |
| 20-24 years | Female          | All races | 2010-2016 | 0.3 | 257 | 76,748,487 |

|             |                 |           |           |     |     |             |
|-------------|-----------------|-----------|-----------|-----|-----|-------------|
| 20-24 years | Female          | White     | 1975-1979 | 0.2 | 103 | 43,010,271  |
| 20-24 years | Female          | White     | 1980-1984 | 0.3 | 131 | 44,952,222  |
| 20-24 years | Female          | White     | 1985-1989 | 0.4 | 145 | 40,973,630  |
| 20-24 years | Female          | White     | 1990-1994 | 0.4 | 147 | 37,543,357  |
| 20-24 years | Female          | White     | 1995-1999 | 0.4 | 146 | 34,986,948  |
| 20-24 years | Female          | White     | 2000-2004 | 0.3 | 122 | 38,274,076  |
| 20-24 years | Female          | White     | 2005-2009 | 0.2 | 86  | 39,641,333  |
| 20-24 years | Female          | White     | 2010-2016 | 0.3 | 149 | 57,524,838  |
| 20-24 years | Female          | Black     | 1975-1979 | 0.6 | 41  | 6,576,596   |
| 20-24 years | Female          | Black     | 1980-1984 | 0.8 | 61  | 7,328,333   |
| 20-24 years | Female          | Black     | 1985-1989 | 1.1 | 77  | 7,143,278   |
| 20-24 years | Female          | Black     | 1990-1994 | 1.1 | 75  | 6,879,906   |
| 20-24 years | Female          | Black     | 1995-1999 | 1.2 | 80  | 6,836,173   |
| 20-24 years | Female          | Black     | 2000-2004 | 1.1 | 85  | 7,610,188   |
| 20-24 years | Female          | Black     | 2005-2009 | 1.0 | 81  | 8,049,091   |
| 20-24 years | Female          | Black     | 2010-2016 | 0.7 | 95  | 12,963,152  |
| 20-24 years | Female          | Other     | 1975-1979 | 0.0 | 0   | 1,080,882   |
| 20-24 years | Female          | Other     | 1980-1984 | 0.0 | 0   | 1,460,242   |
| 20-24 years | Female          | Other     | 1985-1989 | 0.0 | 0   | 1,816,691   |
| 20-24 years | Female          | Other     | 1990-1994 | 0.0 | 0   | 2,336,438   |
| 20-24 years | Female          | Other     | 1995-1999 | 0.0 | 0   | 2,713,932   |
| 20-24 years | Female          | Other     | 2000-2004 | 0.0 | 0   | 3,343,109   |
| 20-24 years | Female          | Other     | 2005-2009 | 0.0 | 0   | 3,840,308   |
| 20-24 years | Female          | Other     | 2010-2016 | 0.2 | 13  | 6,260,497   |
| 25-29 years | Male and female | All races | 1975-1979 | 0.4 | 386 | 91,244,201  |
| 25-29 years | Male and female | All races | 1980-1984 | 0.5 | 506 | 103,156,673 |
| 25-29 years | Male and female | All races | 1985-1989 | 0.5 | 587 | 108,718,504 |
| 25-29 years | Male and female | All races | 1990-1994 | 0.6 | 659 | 102,511,259 |
| 25-29 years | Male and female | All races | 1995-1999 | 0.8 | 759 | 98,821,817  |
| 25-29 years | Male and female | All races | 2000-2004 | 0.6 | 573 | 94,669,590  |
| 25-29 years | Male and female | All races | 2005-2009 | 0.6 | 583 | 102,168,315 |
| 25-29 years | Male and female | All races | 2010-2016 | 0.6 | 915 | 152,732,128 |
| 25-29 years | Male and female | White     | 1975-1979 | 0.3 | 241 | 78,834,898  |
| 25-29 years | Male and female | White     | 1980-1984 | 0.4 | 310 | 87,403,224  |
| 25-29 years | Male and female | White     | 1985-1989 | 0.4 | 358 | 90,816,978  |
| 25-29 years | Male and female | White     | 1990-1994 | 0.4 | 369 | 83,853,532  |
| 25-29 years | Male and female | White     | 1995-1999 | 0.5 | 423 | 79,243,792  |
| 25-29 years | Male and female | White     | 2000-2004 | 0.4 | 320 | 74,277,516  |
| 25-29 years | Male and female | White     | 2005-2009 | 0.4 | 342 | 79,177,231  |
| 25-29 years | Male and female | White     | 2010-2016 | 0.5 | 533 | 116,143,829 |
| 25-29 years | Male and female | Black     | 1975-1979 | 1.3 | 137 | 10,268,609  |
| 25-29 years | Male and female | Black     | 1980-1984 | 1.5 | 185 | 12,642,621  |
| 25-29 years | Male and female | Black     | 1985-1989 | 1.5 | 210 | 13,853,993  |

|             |                 |           |           |     |     |            |
|-------------|-----------------|-----------|-----------|-----|-----|------------|
| 25-29 years | Male and female | Black     | 1990-1994 | 1.9 | 266 | 13,703,017 |
| 25-29 years | Male and female | Black     | 1995-1999 | 2.3 | 312 | 13,513,225 |
| 25-29 years | Male and female | Black     | 2000-2004 | 1.8 | 233 | 13,221,510 |
| 25-29 years | Male and female | Black     | 2005-2009 | 1.5 | 223 | 14,604,130 |
| 25-29 years | Male and female | Black     | 2010-2016 | 1.5 | 346 | 22,960,445 |
| 25-29 years | Male and female | Other     | 1975-1979 | 0.0 | 0   | 2,140,694  |
| 25-29 years | Male and female | Other     | 1980-1984 | 0.4 | 11  | 3,110,828  |
| 25-29 years | Male and female | Other     | 1985-1989 | 0.5 | 19  | 4,047,533  |
| 25-29 years | Male and female | Other     | 1990-1994 | 0.5 | 24  | 4,954,710  |
| 25-29 years | Male and female | Other     | 1995-1999 | 0.4 | 24  | 6,064,800  |
| 25-29 years | Male and female | Other     | 2000-2004 | 0.3 | 20  | 7,170,564  |
| 25-29 years | Male and female | Other     | 2005-2009 | 0.2 | 18  | 8,386,954  |
| 25-29 years | Male and female | Other     | 2010-2016 | 0.3 | 36  | 13,627,854 |
| 25-29 years | Male            | All races | 1975-1979 | 0.4 | 201 | 45,294,267 |
| 25-29 years | Male            | All races | 1980-1984 | 0.5 | 268 | 51,466,212 |
| 25-29 years | Male            | All races | 1985-1989 | 0.6 | 311 | 54,503,468 |
| 25-29 years | Male            | All races | 1990-1994 | 0.7 | 352 | 51,534,406 |
| 25-29 years | Male            | All races | 1995-1999 | 0.8 | 385 | 49,781,993 |
| 25-29 years | Male            | All races | 2000-2004 | 0.7 | 327 | 47,799,334 |
| 25-29 years | Male            | All races | 2005-2009 | 0.7 | 338 | 51,351,687 |
| 25-29 years | Male            | All races | 2010-2016 | 0.7 | 554 | 77,393,188 |
| 25-29 years | Male            | White     | 1975-1979 | 0.3 | 125 | 39,520,315 |
| 25-29 years | Male            | White     | 1980-1984 | 0.4 | 170 | 44,033,159 |
| 25-29 years | Male            | White     | 1985-1989 | 0.4 | 172 | 45,945,879 |
| 25-29 years | Male            | White     | 1990-1994 | 0.4 | 185 | 42,564,087 |
| 25-29 years | Male            | White     | 1995-1999 | 0.5 | 201 | 40,393,695 |
| 25-29 years | Male            | White     | 2000-2004 | 0.4 | 165 | 38,005,358 |
| 25-29 years | Male            | White     | 2005-2009 | 0.5 | 191 | 40,324,125 |
| 25-29 years | Male            | White     | 2010-2016 | 0.5 | 310 | 59,431,133 |
| 25-29 years | Male            | Black     | 1975-1979 | 1.5 | 72  | 4,756,484  |
| 25-29 years | Male            | Black     | 1980-1984 | 1.5 | 92  | 5,945,625  |
| 25-29 years | Male            | Black     | 1985-1989 | 1.9 | 127 | 6,572,109  |
| 25-29 years | Male            | Black     | 1990-1994 | 2.4 | 156 | 6,524,666  |
| 25-29 years | Male            | Black     | 1995-1999 | 2.6 | 167 | 6,422,115  |
| 25-29 years | Male            | Black     | 2000-2004 | 2.4 | 148 | 6,260,999  |
| 25-29 years | Male            | Black     | 2005-2009 | 1.9 | 133 | 6,952,778  |
| 25-29 years | Male            | Black     | 2010-2016 | 2.0 | 224 | 11,234,868 |
| 25-29 years | Male            | Other     | 1975-1979 | 0.0 | 0   | 1,017,468  |
| 25-29 years | Male            | Other     | 1980-1984 | 0.0 | 0   | 1,487,428  |
| 25-29 years | Male            | Other     | 1985-1989 | 0.6 | 12  | 1,985,480  |
| 25-29 years | Male            | Other     | 1990-1994 | 0.4 | 11  | 2,445,653  |
| 25-29 years | Male            | Other     | 1995-1999 | 0.6 | 17  | 2,966,183  |
| 25-29 years | Male            | Other     | 2000-2004 | 0.4 | 14  | 3,532,977  |

|             |                 |           |           |     |       |             |
|-------------|-----------------|-----------|-----------|-----|-------|-------------|
| 25-29 years | Male            | Other     | 2005-2009 | 0.3 | 14    | 4,074,784   |
| 25-29 years | Male            | Other     | 2010-2016 | 0.3 | 20    | 6,727,187   |
| 25-29 years | Female          | All races | 1975-1979 | 0.4 | 185   | 45,949,934  |
| 25-29 years | Female          | All races | 1980-1984 | 0.5 | 238   | 51,690,461  |
| 25-29 years | Female          | All races | 1985-1989 | 0.5 | 276   | 54,215,036  |
| 25-29 years | Female          | All races | 1990-1994 | 0.6 | 307   | 50,976,853  |
| 25-29 years | Female          | All races | 1995-1999 | 0.8 | 374   | 49,039,824  |
| 25-29 years | Female          | All races | 2000-2004 | 0.5 | 246   | 46,870,256  |
| 25-29 years | Female          | All races | 2005-2009 | 0.5 | 245   | 50,816,628  |
| 25-29 years | Female          | All races | 2010-2016 | 0.5 | 361   | 75,338,940  |
| 25-29 years | Female          | White     | 1975-1979 | 0.3 | 116   | 39,314,583  |
| 25-29 years | Female          | White     | 1980-1984 | 0.3 | 140   | 43,370,065  |
| 25-29 years | Female          | White     | 1985-1989 | 0.4 | 186   | 44,871,099  |
| 25-29 years | Female          | White     | 1990-1994 | 0.4 | 184   | 41,289,445  |
| 25-29 years | Female          | White     | 1995-1999 | 0.6 | 222   | 38,850,097  |
| 25-29 years | Female          | White     | 2000-2004 | 0.4 | 155   | 36,272,158  |
| 25-29 years | Female          | White     | 2005-2009 | 0.4 | 151   | 38,853,106  |
| 25-29 years | Female          | White     | 2010-2016 | 0.4 | 223   | 56,712,696  |
| 25-29 years | Female          | Black     | 1975-1979 | 1.2 | 65    | 5,512,125   |
| 25-29 years | Female          | Black     | 1980-1984 | 1.4 | 93    | 6,696,996   |
| 25-29 years | Female          | Black     | 1985-1989 | 1.1 | 83    | 7,281,884   |
| 25-29 years | Female          | Black     | 1990-1994 | 1.5 | 110   | 7,178,351   |
| 25-29 years | Female          | Black     | 1995-1999 | 2.0 | 145   | 7,091,110   |
| 25-29 years | Female          | Black     | 2000-2004 | 1.2 | 85    | 6,960,511   |
| 25-29 years | Female          | Black     | 2005-2009 | 1.2 | 90    | 7,651,352   |
| 25-29 years | Female          | Black     | 2010-2016 | 1.0 | 122   | 11,725,577  |
| 25-29 years | Female          | Other     | 1975-1979 | 0.0 | 0     | 1,123,226   |
| 25-29 years | Female          | Other     | 1980-1984 | 0.0 | 0     | 1,623,400   |
| 25-29 years | Female          | Other     | 1985-1989 | 0.0 | 0     | 2,062,053   |
| 25-29 years | Female          | Other     | 1990-1994 | 0.5 | 13    | 2,509,057   |
| 25-29 years | Female          | Other     | 1995-1999 | 0.0 | 0     | 3,098,617   |
| 25-29 years | Female          | Other     | 2000-2004 | 0.0 | 0     | 3,637,587   |
| 25-29 years | Female          | Other     | 2005-2009 | 0.0 | 0     | 4,312,170   |
| 25-29 years | Female          | Other     | 2010-2016 | 0.2 | 16    | 6,900,667   |
| 30-34 years | Male and female | All races | 1975-1979 | 0.6 | 449   | 77,429,639  |
| 30-34 years | Male and female | All races | 1980-1984 | 0.6 | 595   | 93,757,456  |
| 30-34 years | Male and female | All races | 1985-1989 | 0.7 | 775   | 104,554,219 |
| 30-34 years | Male and female | All races | 1990-1994 | 0.8 | 910   | 111,907,483 |
| 30-34 years | Male and female | All races | 1995-1999 | 0.9 | 981   | 107,319,492 |
| 30-34 years | Male and female | All races | 2000-2004 | 0.8 | 851   | 102,466,426 |
| 30-34 years | Male and female | All races | 2005-2009 | 0.7 | 728   | 97,129,789  |
| 30-34 years | Male and female | All races | 2010-2016 | 0.8 | 1,213 | 147,817,282 |
| 30-34 years | Male and female | White     | 1975-1979 | 0.4 | 299   | 67,451,385  |



|             |                 |           |           |     |     |             |
|-------------|-----------------|-----------|-----------|-----|-----|-------------|
| 30-34 years | Male and female | White     | 1980-1984 | 0.4 | 354 | 80,018,859  |
| 30-34 years | Male and female | White     | 1985-1989 | 0.5 | 456 | 87,764,967  |
| 30-34 years | Male and female | White     | 1990-1994 | 0.6 | 545 | 92,735,161  |
| 30-34 years | Male and female | White     | 1995-1999 | 0.6 | 555 | 87,267,549  |
| 30-34 years | Male and female | White     | 2000-2004 | 0.6 | 510 | 81,400,742  |
| 30-34 years | Male and female | White     | 2005-2009 | 0.6 | 422 | 75,378,502  |
| 30-34 years | Male and female | White     | 2010-2016 | 0.7 | 737 | 113,083,611 |
| 30-34 years | Male and female | Black     | 1975-1979 | 1.8 | 142 | 8,089,731   |
| 30-34 years | Male and female | Black     | 1980-1984 | 2.1 | 223 | 10,651,543  |
| 30-34 years | Male and female | Black     | 1985-1989 | 2.4 | 303 | 12,665,868  |
| 30-34 years | Male and female | Black     | 1990-1994 | 2.4 | 340 | 14,071,812  |
| 30-34 years | Male and female | Black     | 1995-1999 | 2.7 | 388 | 14,181,501  |
| 30-34 years | Male and female | Black     | 2000-2004 | 2.3 | 321 | 13,828,091  |
| 30-34 years | Male and female | Black     | 2005-2009 | 2.1 | 284 | 13,486,553  |
| 30-34 years | Male and female | Black     | 2010-2016 | 2.0 | 422 | 21,201,341  |
| 30-34 years | Male and female | Other     | 1975-1979 | 0.0 | 0   | 1,888,523   |
| 30-34 years | Male and female | Other     | 1980-1984 | 0.6 | 18  | 3,087,054   |
| 30-34 years | Male and female | Other     | 1985-1989 | 0.4 | 16  | 4,123,384   |
| 30-34 years | Male and female | Other     | 1990-1994 | 0.5 | 25  | 5,100,510   |
| 30-34 years | Male and female | Other     | 1995-1999 | 0.6 | 38  | 5,870,442   |
| 30-34 years | Male and female | Other     | 2000-2004 | 0.3 | 20  | 7,237,593   |
| 30-34 years | Male and female | Other     | 2005-2009 | 0.3 | 22  | 8,264,734   |
| 30-34 years | Male and female | Other     | 2010-2016 | 0.4 | 54  | 13,532,330  |
| 30-34 years | Male            | All races | 1975-1979 | 0.6 | 236 | 38,211,373  |
| 30-34 years | Male            | All races | 1980-1984 | 0.6 | 296 | 46,431,118  |
| 30-34 years | Male            | All races | 1985-1989 | 0.8 | 391 | 51,995,068  |
| 30-34 years | Male            | All races | 1990-1994 | 0.8 | 459 | 55,915,673  |
| 30-34 years | Male            | All races | 1995-1999 | 0.9 | 484 | 53,843,625  |
| 30-34 years | Male            | All races | 2000-2004 | 0.9 | 456 | 51,502,147  |
| 30-34 years | Male            | All races | 2005-2009 | 0.7 | 357 | 48,696,945  |
| 30-34 years | Male            | All races | 2010-2016 | 0.9 | 672 | 74,177,426  |
| 30-34 years | Male            | White     | 1975-1979 | 0.5 | 164 | 33,615,715  |
| 30-34 years | Male            | White     | 1980-1984 | 0.4 | 175 | 40,044,999  |
| 30-34 years | Male            | White     | 1985-1989 | 0.5 | 221 | 44,105,704  |
| 30-34 years | Male            | White     | 1990-1994 | 0.6 | 274 | 46,831,848  |
| 30-34 years | Male            | White     | 1995-1999 | 0.6 | 265 | 44,313,378  |
| 30-34 years | Male            | White     | 2000-2004 | 0.6 | 255 | 41,436,708  |
| 30-34 years | Male            | White     | 2005-2009 | 0.5 | 186 | 38,355,781  |
| 30-34 years | Male            | White     | 2010-2016 | 0.7 | 384 | 57,529,271  |
| 30-34 years | Male            | Black     | 1975-1979 | 1.8 | 68  | 3,710,198   |
| 30-34 years | Male            | Black     | 1980-1984 | 2.3 | 114 | 4,925,645   |
| 30-34 years | Male            | Black     | 1985-1989 | 2.7 | 161 | 5,901,744   |
| 30-34 years | Male            | Black     | 1990-1994 | 2.7 | 175 | 6,596,742   |

|             |        |           |           |     |     |            |
|-------------|--------|-----------|-----------|-----|-----|------------|
| 30-34 years | Male   | Black     | 1995-1999 | 3.0 | 202 | 6,688,671  |
| 30-34 years | Male   | Black     | 2000-2004 | 2.9 | 190 | 6,521,567  |
| 30-34 years | Male   | Black     | 2005-2009 | 2.5 | 156 | 6,348,864  |
| 30-34 years | Male   | Black     | 2010-2016 | 2.5 | 254 | 10,138,545 |
| 30-34 years | Male   | Other     | 1975-1979 | 0.0 | 0   | 885,460    |
| 30-34 years | Male   | Other     | 1980-1984 | 0.0 | 0   | 1,460,474  |
| 30-34 years | Male   | Other     | 1985-1989 | 0.0 | 0   | 1,987,620  |
| 30-34 years | Male   | Other     | 1990-1994 | 0.4 | 10  | 2,487,083  |
| 30-34 years | Male   | Other     | 1995-1999 | 0.6 | 17  | 2,841,576  |
| 30-34 years | Male   | Other     | 2000-2004 | 0.3 | 11  | 3,543,872  |
| 30-34 years | Male   | Other     | 2005-2009 | 0.4 | 15  | 3,992,300  |
| 30-34 years | Male   | Other     | 2010-2016 | 0.5 | 34  | 6,509,610  |
| 30-34 years | Female | All races | 1975-1979 | 0.5 | 213 | 39,218,266 |
| 30-34 years | Female | All races | 1980-1984 | 0.6 | 299 | 47,326,338 |
| 30-34 years | Female | All races | 1985-1989 | 0.7 | 384 | 52,559,151 |
| 30-34 years | Female | All races | 1990-1994 | 0.8 | 451 | 55,991,810 |
| 30-34 years | Female | All races | 1995-1999 | 0.9 | 497 | 53,475,867 |
| 30-34 years | Female | All races | 2000-2004 | 0.8 | 395 | 50,964,279 |
| 30-34 years | Female | All races | 2005-2009 | 0.8 | 371 | 48,432,844 |
| 30-34 years | Female | All races | 2010-2016 | 0.7 | 541 | 73,639,856 |
| 30-34 years | Female | White     | 1975-1979 | 0.4 | 135 | 33,835,670 |
| 30-34 years | Female | White     | 1980-1984 | 0.4 | 179 | 39,973,860 |
| 30-34 years | Female | White     | 1985-1989 | 0.5 | 235 | 43,659,263 |
| 30-34 years | Female | White     | 1990-1994 | 0.6 | 271 | 45,903,313 |
| 30-34 years | Female | White     | 1995-1999 | 0.7 | 290 | 42,954,171 |
| 30-34 years | Female | White     | 2000-2004 | 0.6 | 255 | 39,964,034 |
| 30-34 years | Female | White     | 2005-2009 | 0.6 | 236 | 37,022,721 |
| 30-34 years | Female | White     | 2010-2016 | 0.6 | 353 | 55,554,340 |
| 30-34 years | Female | Black     | 1975-1979 | 1.7 | 74  | 4,379,533  |
| 30-34 years | Female | Black     | 1980-1984 | 1.9 | 109 | 5,725,898  |
| 30-34 years | Female | Black     | 1985-1989 | 2.1 | 142 | 6,764,124  |
| 30-34 years | Female | Black     | 1990-1994 | 2.2 | 165 | 7,475,070  |
| 30-34 years | Female | Black     | 1995-1999 | 2.5 | 186 | 7,492,830  |
| 30-34 years | Female | Black     | 2000-2004 | 1.8 | 131 | 7,306,524  |
| 30-34 years | Female | Black     | 2005-2009 | 1.8 | 128 | 7,137,689  |
| 30-34 years | Female | Black     | 2010-2016 | 1.5 | 168 | 11,062,796 |
| 30-34 years | Female | Other     | 1975-1979 | 0.0 | 0   | 1,003,063  |
| 30-34 years | Female | Other     | 1980-1984 | 0.7 | 11  | 1,626,580  |
| 30-34 years | Female | Other     | 1985-1989 | 0.0 | 0   | 2,135,764  |
| 30-34 years | Female | Other     | 1990-1994 | 0.6 | 15  | 2,613,427  |
| 30-34 years | Female | Other     | 1995-1999 | 0.7 | 21  | 3,028,866  |
| 30-34 years | Female | Other     | 2000-2004 | 0.0 | 0   | 3,693,721  |
| 30-34 years | Female | Other     | 2005-2009 | 0.0 | 0   | 4,272,434  |

|             |                 |           |           |     |       |             |
|-------------|-----------------|-----------|-----------|-----|-------|-------------|
| 30-34 years | Female          | Other     | 2010-2016 | 0.3 | 20    | 7,022,720   |
| 35-39 years | Male and female | All races | 1975-1979 | 1.1 | 708   | 62,444,763  |
| 35-39 years | Male and female | All races | 1980-1984 | 1.1 | 841   | 76,993,823  |
| 35-39 years | Male and female | All races | 1985-1989 | 1.2 | 1,127 | 93,280,475  |
| 35-39 years | Male and female | All races | 1990-1994 | 1.3 | 1,328 | 105,613,244 |
| 35-39 years | Male and female | All races | 1995-1999 | 1.4 | 1,573 | 113,989,738 |
| 35-39 years | Male and female | All races | 2000-2004 | 1.5 | 1,583 | 108,776,796 |
| 35-39 years | Male and female | All races | 2005-2009 | 1.2 | 1,204 | 104,029,036 |
| 35-39 years | Male and female | All races | 2010-2016 | 1.2 | 1,704 | 139,890,361 |
| 35-39 years | Male and female | White     | 1975-1979 | 0.9 | 480   | 54,428,589  |
| 35-39 years | Male and female | White     | 1980-1984 | 0.8 | 539   | 66,577,135  |
| 35-39 years | Male and female | White     | 1985-1989 | 0.9 | 707   | 79,098,187  |
| 35-39 years | Male and female | White     | 1990-1994 | 0.9 | 819   | 88,044,941  |
| 35-39 years | Male and female | White     | 1995-1999 | 1.1 | 990   | 93,761,011  |
| 35-39 years | Male and female | White     | 2000-2004 | 1.2 | 1,031 | 87,631,231  |
| 35-39 years | Male and female | White     | 2005-2009 | 1.0 | 794   | 81,925,609  |
| 35-39 years | Male and female | White     | 2010-2016 | 1.0 | 1,092 | 107,323,037 |
| 35-39 years | Male and female | Black     | 1975-1979 | 3.3 | 217   | 6,541,672   |
| 35-39 years | Male and female | Black     | 1980-1984 | 3.5 | 283   | 8,042,333   |
| 35-39 years | Male and female | Black     | 1985-1989 | 3.7 | 395   | 10,587,774  |
| 35-39 years | Male and female | Black     | 1990-1994 | 3.7 | 472   | 12,864,499  |
| 35-39 years | Male and female | Black     | 1995-1999 | 3.7 | 541   | 14,467,147  |
| 35-39 years | Male and female | Black     | 2000-2004 | 3.5 | 510   | 14,417,480  |
| 35-39 years | Male and female | Black     | 2005-2009 | 2.6 | 372   | 14,054,835  |
| 35-39 years | Male and female | Black     | 2010-2016 | 2.8 | 554   | 19,694,660  |
| 35-39 years | Male and female | Other     | 1975-1979 | 0.7 | 11    | 1,474,502   |
| 35-39 years | Male and female | Other     | 1980-1984 | 0.8 | 19    | 2,374,355   |
| 35-39 years | Male and female | Other     | 1985-1989 | 0.7 | 25    | 3,594,514   |
| 35-39 years | Male and female | Other     | 1990-1994 | 0.8 | 37    | 4,703,804   |
| 35-39 years | Male and female | Other     | 1995-1999 | 0.7 | 42    | 5,761,580   |
| 35-39 years | Male and female | Other     | 2000-2004 | 0.6 | 42    | 6,728,085   |
| 35-39 years | Male and female | Other     | 2005-2009 | 0.5 | 38    | 8,048,592   |
| 35-39 years | Male and female | Other     | 2010-2016 | 0.5 | 58    | 12,872,664  |
| 35-39 years | Male            | All races | 1975-1979 | 1.2 | 357   | 30,575,504  |
| 35-39 years | Male            | All races | 1980-1984 | 1.1 | 420   | 37,877,784  |
| 35-39 years | Male            | All races | 1985-1989 | 1.3 | 592   | 46,087,233  |
| 35-39 years | Male            | All races | 1990-1994 | 1.3 | 662   | 52,463,124  |
| 35-39 years | Male            | All races | 1995-1999 | 1.3 | 761   | 56,800,105  |
| 35-39 years | Male            | All races | 2000-2004 | 1.4 | 749   | 54,260,668  |
| 35-39 years | Male            | All races | 2005-2009 | 1.1 | 591   | 51,895,151  |
| 35-39 years | Male            | All races | 2010-2016 | 1.2 | 856   | 69,738,592  |
| 35-39 years | Male            | White     | 1975-1979 | 0.9 | 229   | 26,927,531  |
| 35-39 years | Male            | White     | 1980-1984 | 0.8 | 266   | 33,086,487  |

|             |        |           |           |     |     |            |
|-------------|--------|-----------|-----------|-----|-----|------------|
| 35-39 years | Male   | White     | 1985-1989 | 0.9 | 362 | 39,511,663 |
| 35-39 years | Male   | White     | 1990-1994 | 1.0 | 426 | 44,209,486 |
| 35-39 years | Male   | White     | 1995-1999 | 1.0 | 473 | 47,223,820 |
| 35-39 years | Male   | White     | 2000-2004 | 1.1 | 477 | 44,218,585 |
| 35-39 years | Male   | White     | 2005-2009 | 0.9 | 369 | 41,421,290 |
| 35-39 years | Male   | White     | 2010-2016 | 1.0 | 528 | 54,289,335 |
| 35-39 years | Male   | Black     | 1975-1979 | 4.2 | 123 | 2,947,165  |
| 35-39 years | Male   | Black     | 1980-1984 | 4.0 | 146 | 3,665,174  |
| 35-39 years | Male   | Black     | 1985-1989 | 4.4 | 216 | 4,879,787  |
| 35-39 years | Male   | Black     | 1990-1994 | 3.7 | 220 | 5,997,080  |
| 35-39 years | Male   | Black     | 1995-1999 | 3.9 | 262 | 6,786,216  |
| 35-39 years | Male   | Black     | 2000-2004 | 3.7 | 251 | 6,776,755  |
| 35-39 years | Male   | Black     | 2005-2009 | 3.0 | 200 | 6,607,778  |
| 35-39 years | Male   | Black     | 2010-2016 | 3.1 | 292 | 9,299,080  |
| 35-39 years | Male   | Other     | 1975-1979 | 0.0 | 0   | 700,808    |
| 35-39 years | Male   | Other     | 1980-1984 | 0.0 | 0   | 1,126,123  |
| 35-39 years | Male   | Other     | 1985-1989 | 0.8 | 14  | 1,695,783  |
| 35-39 years | Male   | Other     | 1990-1994 | 0.7 | 16  | 2,256,558  |
| 35-39 years | Male   | Other     | 1995-1999 | 0.9 | 26  | 2,790,069  |
| 35-39 years | Male   | Other     | 2000-2004 | 0.6 | 21  | 3,265,328  |
| 35-39 years | Male   | Other     | 2005-2009 | 0.6 | 22  | 3,866,083  |
| 35-39 years | Male   | Other     | 2010-2016 | 0.6 | 36  | 6,150,177  |
| 35-39 years | Female | All races | 1975-1979 | 1.1 | 351 | 31,869,259 |
| 35-39 years | Female | All races | 1980-1984 | 1.1 | 421 | 39,116,039 |
| 35-39 years | Female | All races | 1985-1989 | 1.1 | 535 | 47,193,242 |
| 35-39 years | Female | All races | 1990-1994 | 1.3 | 666 | 53,150,120 |
| 35-39 years | Female | All races | 1995-1999 | 1.4 | 812 | 57,189,633 |
| 35-39 years | Female | All races | 2000-2004 | 1.5 | 834 | 54,516,128 |
| 35-39 years | Female | All races | 2005-2009 | 1.2 | 613 | 52,133,885 |
| 35-39 years | Female | All races | 2010-2016 | 1.2 | 848 | 70,151,769 |
| 35-39 years | Female | White     | 1975-1979 | 0.9 | 251 | 27,501,058 |
| 35-39 years | Female | White     | 1980-1984 | 0.8 | 273 | 33,490,648 |
| 35-39 years | Female | White     | 1985-1989 | 0.9 | 345 | 39,586,524 |
| 35-39 years | Female | White     | 1990-1994 | 0.9 | 393 | 43,835,455 |
| 35-39 years | Female | White     | 1995-1999 | 1.1 | 517 | 46,537,191 |
| 35-39 years | Female | White     | 2000-2004 | 1.3 | 554 | 43,412,646 |
| 35-39 years | Female | White     | 2005-2009 | 1.0 | 425 | 40,504,319 |
| 35-39 years | Female | White     | 2010-2016 | 1.1 | 564 | 53,033,702 |
| 35-39 years | Female | Black     | 1975-1979 | 2.6 | 94  | 3,594,507  |
| 35-39 years | Female | Black     | 1980-1984 | 3.1 | 137 | 4,377,159  |
| 35-39 years | Female | Black     | 1985-1989 | 3.1 | 179 | 5,707,987  |
| 35-39 years | Female | Black     | 1990-1994 | 3.7 | 252 | 6,867,419  |
| 35-39 years | Female | Black     | 1995-1999 | 3.6 | 279 | 7,680,931  |

|             |                 |           |           |     |       |             |
|-------------|-----------------|-----------|-----------|-----|-------|-------------|
| 35-39 years | Female          | Black     | 2000-2004 | 3.4 | 259   | 7,640,725   |
| 35-39 years | Female          | Black     | 2005-2009 | 2.3 | 172   | 7,447,057   |
| 35-39 years | Female          | Black     | 2010-2016 | 2.5 | 262   | 10,395,580  |
| 35-39 years | Female          | Other     | 1975-1979 | 0.0 | 0     | 773,694     |
| 35-39 years | Female          | Other     | 1980-1984 | 0.9 | 11    | 1,248,232   |
| 35-39 years | Female          | Other     | 1985-1989 | 0.6 | 11    | 1,898,731   |
| 35-39 years | Female          | Other     | 1990-1994 | 0.9 | 21    | 2,447,246   |
| 35-39 years | Female          | Other     | 1995-1999 | 0.5 | 16    | 2,971,511   |
| 35-39 years | Female          | Other     | 2000-2004 | 0.6 | 21    | 3,462,757   |
| 35-39 years | Female          | Other     | 2005-2009 | 0.4 | 16    | 4,182,509   |
| 35-39 years | Female          | Other     | 2010-2016 | 0.3 | 22    | 6,722,487   |
| 40-44 years | Male and female | All races | 1975-1979 | 2.6 | 1,461 | 56,377,794  |
| 40-44 years | Male and female | All races | 1980-1984 | 2.3 | 1,435 | 63,007,401  |
| 40-44 years | Male and female | All races | 1985-1989 | 2.3 | 1,804 | 77,240,556  |
| 40-44 years | Male and female | All races | 1990-1994 | 2.3 | 2,138 | 94,206,209  |
| 40-44 years | Male and female | All races | 1995-1999 | 2.6 | 2,773 | 106,325,739 |
| 40-44 years | Male and female | All races | 2000-2004 | 2.8 | 3,161 | 114,038,929 |
| 40-44 years | Male and female | All races | 2005-2009 | 2.6 | 2,878 | 109,196,830 |
| 40-44 years | Male and female | All races | 2010-2016 | 2.3 | 3,390 | 144,346,186 |
| 40-44 years | Male and female | White     | 1975-1979 | 2.3 | 1,118 | 49,089,711  |
| 40-44 years | Male and female | White     | 1980-1984 | 1.9 | 1,017 | 54,421,676  |
| 40-44 years | Male and female | White     | 1985-1989 | 1.9 | 1,274 | 66,405,513  |
| 40-44 years | Male and female | White     | 1990-1994 | 1.8 | 1,429 | 79,478,971  |
| 40-44 years | Male and female | White     | 1995-1999 | 2.1 | 1,895 | 88,196,608  |
| 40-44 years | Male and female | White     | 2000-2004 | 2.4 | 2,273 | 93,188,250  |
| 40-44 years | Male and female | White     | 2005-2009 | 2.5 | 2,144 | 87,342,598  |
| 40-44 years | Male and female | White     | 2010-2016 | 2.2 | 2,514 | 112,292,557 |
| 40-44 years | Male and female | Black     | 1975-1979 | 5.4 | 327   | 6,039,866   |
| 40-44 years | Male and female | Black     | 1980-1984 | 5.8 | 391   | 6,734,618   |
| 40-44 years | Male and female | Black     | 1985-1989 | 6.2 | 495   | 8,018,709   |
| 40-44 years | Male and female | Black     | 1990-1994 | 6.2 | 657   | 10,652,050  |
| 40-44 years | Male and female | Black     | 1995-1999 | 6.2 | 801   | 12,915,423  |
| 40-44 years | Male and female | Black     | 2000-2004 | 5.6 | 814   | 14,507,767  |
| 40-44 years | Male and female | Black     | 2005-2009 | 4.5 | 651   | 14,529,357  |
| 40-44 years | Male and female | Black     | 2010-2016 | 4.0 | 788   | 19,720,573  |
| 40-44 years | Male and female | Other     | 1975-1979 | 1.3 | 16    | 1,248,217   |
| 40-44 years | Male and female | Other     | 1980-1984 | 1.5 | 27    | 1,851,107   |
| 40-44 years | Male and female | Other     | 1985-1989 | 1.2 | 35    | 2,816,334   |
| 40-44 years | Male and female | Other     | 1990-1994 | 1.3 | 52    | 4,075,188   |
| 40-44 years | Male and female | Other     | 1995-1999 | 1.5 | 77    | 5,213,708   |
| 40-44 years | Male and female | Other     | 2000-2004 | 1.2 | 74    | 6,342,912   |
| 40-44 years | Male and female | Other     | 2005-2009 | 1.1 | 83    | 7,324,875   |
| 40-44 years | Male and female | Other     | 2010-2016 | 0.7 | 88    | 12,333,056  |

|             |        |           |           |     |       |            |
|-------------|--------|-----------|-----------|-----|-------|------------|
| 40-44 years | Male   | All races | 1975-1979 | 2.8 | 765   | 27,600,854 |
| 40-44 years | Male   | All races | 1980-1984 | 2.4 | 726   | 30,876,426 |
| 40-44 years | Male   | All races | 1985-1989 | 2.5 | 951   | 37,997,931 |
| 40-44 years | Male   | All races | 1990-1994 | 2.4 | 1,102 | 46,507,613 |
| 40-44 years | Male   | All races | 1995-1999 | 2.4 | 1,260 | 52,604,399 |
| 40-44 years | Male   | All races | 2000-2004 | 2.7 | 1,500 | 56,541,429 |
| 40-44 years | Male   | All races | 2005-2009 | 2.5 | 1,367 | 54,198,416 |
| 40-44 years | Male   | All races | 2010-2016 | 2.2 | 1,581 | 71,699,515 |
| 40-44 years | Male   | White     | 1975-1979 | 2.4 | 581   | 24,267,382 |
| 40-44 years | Male   | White     | 1980-1984 | 1.9 | 507   | 26,913,990 |
| 40-44 years | Male   | White     | 1985-1989 | 2.0 | 648   | 32,983,374 |
| 40-44 years | Male   | White     | 1990-1994 | 1.9 | 734   | 39,670,749 |
| 40-44 years | Male   | White     | 1995-1999 | 2.0 | 871   | 44,116,979 |
| 40-44 years | Male   | White     | 2000-2004 | 2.3 | 1,084 | 46,699,271 |
| 40-44 years | Male   | White     | 2005-2009 | 2.3 | 1,005 | 43,853,026 |
| 40-44 years | Male   | White     | 2010-2016 | 2.0 | 1,134 | 56,542,596 |
| 40-44 years | Male   | Black     | 1975-1979 | 6.4 | 174   | 2,732,959  |
| 40-44 years | Male   | Black     | 1980-1984 | 6.8 | 207   | 3,062,147  |
| 40-44 years | Male   | Black     | 1985-1989 | 7.7 | 283   | 3,675,757  |
| 40-44 years | Male   | Black     | 1990-1994 | 6.9 | 342   | 4,921,396  |
| 40-44 years | Male   | Black     | 1995-1999 | 5.8 | 350   | 6,014,458  |
| 40-44 years | Male   | Black     | 2000-2004 | 5.6 | 378   | 6,806,286  |
| 40-44 years | Male   | Black     | 2005-2009 | 4.6 | 317   | 6,836,366  |
| 40-44 years | Male   | Black     | 2010-2016 | 4.4 | 407   | 9,281,924  |
| 40-44 years | Male   | Other     | 1975-1979 | 1.7 | 10    | 600,513    |
| 40-44 years | Male   | Other     | 1980-1984 | 1.3 | 12    | 900,289    |
| 40-44 years | Male   | Other     | 1985-1989 | 1.5 | 20    | 1,338,800  |
| 40-44 years | Male   | Other     | 1990-1994 | 1.4 | 26    | 1,915,468  |
| 40-44 years | Male   | Other     | 1995-1999 | 1.6 | 39    | 2,472,962  |
| 40-44 years | Male   | Other     | 2000-2004 | 1.3 | 38    | 3,035,872  |
| 40-44 years | Male   | Other     | 2005-2009 | 1.3 | 45    | 3,509,024  |
| 40-44 years | Male   | Other     | 2010-2016 | 0.7 | 40    | 5,874,995  |
| 40-44 years | Female | All races | 1975-1979 | 2.4 | 696   | 28,776,940 |
| 40-44 years | Female | All races | 1980-1984 | 2.2 | 709   | 32,130,975 |
| 40-44 years | Female | All races | 1985-1989 | 2.2 | 853   | 39,242,625 |
| 40-44 years | Female | All races | 1990-1994 | 2.2 | 1,036 | 47,698,596 |
| 40-44 years | Female | All races | 1995-1999 | 2.8 | 1,513 | 53,721,340 |
| 40-44 years | Female | All races | 2000-2004 | 2.9 | 1,661 | 57,497,500 |
| 40-44 years | Female | All races | 2005-2009 | 2.7 | 1,511 | 54,998,414 |
| 40-44 years | Female | All races | 2010-2016 | 2.5 | 1,809 | 72,646,671 |
| 40-44 years | Female | White     | 1975-1979 | 2.2 | 537   | 24,822,329 |
| 40-44 years | Female | White     | 1980-1984 | 1.9 | 510   | 27,507,686 |
| 40-44 years | Female | White     | 1985-1989 | 1.9 | 626   | 33,422,139 |

|             |                 |           |           |      |       |             |
|-------------|-----------------|-----------|-----------|------|-------|-------------|
| 40-44 years | Female          | White     | 1990-1994 | 1.7  | 695   | 39,808,222  |
| 40-44 years | Female          | White     | 1995-1999 | 2.3  | 1,024 | 44,079,629  |
| 40-44 years | Female          | White     | 2000-2004 | 2.6  | 1,189 | 46,488,979  |
| 40-44 years | Female          | White     | 2005-2009 | 2.6  | 1,139 | 43,489,572  |
| 40-44 years | Female          | White     | 2010-2016 | 2.5  | 1,380 | 55,749,961  |
| 40-44 years | Female          | Black     | 1975-1979 | 4.6  | 153   | 3,306,907   |
| 40-44 years | Female          | Black     | 1980-1984 | 5.0  | 184   | 3,672,471   |
| 40-44 years | Female          | Black     | 1985-1989 | 4.9  | 212   | 4,342,952   |
| 40-44 years | Female          | Black     | 1990-1994 | 5.5  | 315   | 5,730,654   |
| 40-44 years | Female          | Black     | 1995-1999 | 6.5  | 451   | 6,900,965   |
| 40-44 years | Female          | Black     | 2000-2004 | 5.7  | 436   | 7,701,481   |
| 40-44 years | Female          | Black     | 2005-2009 | 4.3  | 334   | 7,692,991   |
| 40-44 years | Female          | Black     | 2010-2016 | 3.6  | 381   | 10,438,649  |
| 40-44 years | Female          | Other     | 1975-1979 | 0.0  | 0     | 647,704     |
| 40-44 years | Female          | Other     | 1980-1984 | 1.6  | 15    | 950,818     |
| 40-44 years | Female          | Other     | 1985-1989 | 1.0  | 15    | 1,477,534   |
| 40-44 years | Female          | Other     | 1990-1994 | 1.2  | 26    | 2,159,720   |
| 40-44 years | Female          | Other     | 1995-1999 | 1.4  | 38    | 2,740,746   |
| 40-44 years | Female          | Other     | 2000-2004 | 1.1  | 36    | 3,307,040   |
| 40-44 years | Female          | Other     | 2005-2009 | 1.0  | 38    | 3,815,851   |
| 40-44 years | Female          | Other     | 2010-2016 | 0.7  | 48    | 6,458,061   |
| 45-49 years | Male and female | All races | 1975-1979 | 6.1  | 3,506 | 57,503,988  |
| 45-49 years | Male and female | All races | 1980-1984 | 5.8  | 3,207 | 55,674,387  |
| 45-49 years | Male and female | All races | 1985-1989 | 5.6  | 3,451 | 62,152,711  |
| 45-49 years | Male and female | All races | 1990-1994 | 5.3  | 4,018 | 76,174,700  |
| 45-49 years | Male and female | All races | 1995-1999 | 5.2  | 4,889 | 93,689,277  |
| 45-49 years | Male and female | All races | 2000-2004 | 5.7  | 6,035 | 105,958,736 |
| 45-49 years | Male and female | All races | 2005-2009 | 6.2  | 7,060 | 113,615,436 |
| 45-49 years | Male and female | All races | 2010-2016 | 5.7  | 8,576 | 150,384,506 |
| 45-49 years | Male and female | White     | 1975-1979 | 5.6  | 2,860 | 50,707,936  |
| 45-49 years | Male and female | White     | 1980-1984 | 5.3  | 2,555 | 48,324,721  |
| 45-49 years | Male and female | White     | 1985-1989 | 5.0  | 2,694 | 53,472,118  |
| 45-49 years | Male and female | White     | 1990-1994 | 4.6  | 3,018 | 65,315,143  |
| 45-49 years | Male and female | White     | 1995-1999 | 4.6  | 3,616 | 78,789,125  |
| 45-49 years | Male and female | White     | 2000-2004 | 5.4  | 4,692 | 87,508,407  |
| 45-49 years | Male and female | White     | 2005-2009 | 6.1  | 5,656 | 92,314,349  |
| 45-49 years | Male and female | White     | 2010-2016 | 5.8  | 6,941 | 119,186,992 |
| 45-49 years | Male and female | Black     | 1975-1979 | 10.7 | 616   | 5,736,920   |
| 45-49 years | Male and female | Black     | 1980-1984 | 10.5 | 620   | 5,896,802   |
| 45-49 years | Male and female | Black     | 1985-1989 | 10.6 | 701   | 6,600,881   |
| 45-49 years | Male and female | Black     | 1990-1994 | 11.9 | 935   | 7,824,438   |
| 45-49 years | Male and female | Black     | 1995-1999 | 11.1 | 1,167 | 10,501,527  |
| 45-49 years | Male and female | Black     | 2000-2004 | 9.5  | 1,215 | 12,777,911  |

|             |                 |           |           |      |       |            |
|-------------|-----------------|-----------|-----------|------|-------|------------|
| 45-49 years | Male and female | Black     | 2005-2009 | 8.7  | 1,259 | 14,459,057 |
| 45-49 years | Male and female | Black     | 2010-2016 | 7.2  | 1,451 | 20,066,688 |
| 45-49 years | Male and female | Other     | 1975-1979 | 2.8  | 30    | 1,059,132  |
| 45-49 years | Male and female | Other     | 1980-1984 | 2.2  | 32    | 1,452,864  |
| 45-49 years | Male and female | Other     | 1985-1989 | 2.7  | 56    | 2,079,712  |
| 45-49 years | Male and female | Other     | 1990-1994 | 2.1  | 65    | 3,035,119  |
| 45-49 years | Male and female | Other     | 1995-1999 | 2.4  | 106   | 4,398,625  |
| 45-49 years | Male and female | Other     | 2000-2004 | 2.3  | 128   | 5,672,418  |
| 45-49 years | Male and female | Other     | 2005-2009 | 2.1  | 145   | 6,842,030  |
| 45-49 years | Male and female | Other     | 2010-2016 | 1.7  | 184   | 11,130,826 |
| 45-49 years | Male            | All races | 1975-1979 | 7.5  | 2,085 | 27,911,520 |
| 45-49 years | Male            | All races | 1980-1984 | 6.3  | 1,701 | 27,137,341 |
| 45-49 years | Male            | All races | 1985-1989 | 5.7  | 1,740 | 30,424,842 |
| 45-49 years | Male            | All races | 1990-1994 | 5.5  | 2,071 | 37,387,779 |
| 45-49 years | Male            | All races | 1995-1999 | 5.3  | 2,457 | 46,044,576 |
| 45-49 years | Male            | All races | 2000-2004 | 6.0  | 3,119 | 52,199,091 |
| 45-49 years | Male            | All races | 2005-2009 | 6.0  | 3,366 | 56,077,123 |
| 45-49 years | Male            | All races | 2010-2016 | 5.1  | 3,826 | 74,394,817 |
| 45-49 years | Male            | White     | 1975-1979 | 6.8  | 1,676 | 24,816,638 |
| 45-49 years | Male            | White     | 1980-1984 | 5.6  | 1,322 | 23,771,213 |
| 45-49 years | Male            | White     | 1985-1989 | 5.1  | 1,341 | 26,408,298 |
| 45-49 years | Male            | White     | 1990-1994 | 4.9  | 1,573 | 32,367,143 |
| 45-49 years | Male            | White     | 1995-1999 | 4.7  | 1,826 | 39,148,365 |
| 45-49 years | Male            | White     | 2000-2004 | 5.7  | 2,467 | 43,568,736 |
| 45-49 years | Male            | White     | 2005-2009 | 5.9  | 2,710 | 46,037,878 |
| 45-49 years | Male            | White     | 2010-2016 | 5.2  | 3,076 | 59,653,387 |
| 45-49 years | Male            | Black     | 1975-1979 | 15.0 | 389   | 2,597,144  |
| 45-49 years | Male            | Black     | 1980-1984 | 13.5 | 360   | 2,667,050  |
| 45-49 years | Male            | Black     | 1985-1989 | 12.2 | 366   | 3,000,412  |
| 45-49 years | Male            | Black     | 1990-1994 | 13.0 | 466   | 3,577,741  |
| 45-49 years | Male            | Black     | 1995-1999 | 11.9 | 577   | 4,839,591  |
| 45-49 years | Male            | Black     | 2000-2004 | 9.9  | 588   | 5,960,660  |
| 45-49 years | Male            | Black     | 2005-2009 | 8.4  | 573   | 6,794,336  |
| 45-49 years | Male            | Black     | 2010-2016 | 7.0  | 657   | 9,446,219  |
| 45-49 years | Male            | Other     | 1975-1979 | 4.0  | 20    | 497,738    |
| 45-49 years | Male            | Other     | 1980-1984 | 2.7  | 19    | 699,078    |
| 45-49 years | Male            | Other     | 1985-1989 | 3.2  | 33    | 1,016,132  |
| 45-49 years | Male            | Other     | 1990-1994 | 2.2  | 32    | 1,442,895  |
| 45-49 years | Male            | Other     | 1995-1999 | 2.6  | 54    | 2,056,620  |
| 45-49 years | Male            | Other     | 2000-2004 | 2.4  | 64    | 2,669,695  |
| 45-49 years | Male            | Other     | 2005-2009 | 2.6  | 83    | 3,244,909  |
| 45-49 years | Male            | Other     | 2010-2016 | 1.8  | 93    | 5,295,211  |
| 45-49 years | Female          | All races | 1975-1979 | 4.8  | 1,421 | 29,592,468 |



|             |                 |           |           |      |        |             |
|-------------|-----------------|-----------|-----------|------|--------|-------------|
| 45-49 years | Female          | All races | 1980-1984 | 5.3  | 1,506  | 28,537,046  |
| 45-49 years | Female          | All races | 1985-1989 | 5.4  | 1,711  | 31,727,869  |
| 45-49 years | Female          | All races | 1990-1994 | 5.0  | 1,947  | 38,786,921  |
| 45-49 years | Female          | All races | 1995-1999 | 5.1  | 2,432  | 47,644,701  |
| 45-49 years | Female          | All races | 2000-2004 | 5.4  | 2,916  | 53,759,645  |
| 45-49 years | Female          | All races | 2005-2009 | 6.4  | 3,694  | 57,538,313  |
| 45-49 years | Female          | All races | 2010-2016 | 6.3  | 4,750  | 75,989,689  |
| 45-49 years | Female          | White     | 1975-1979 | 4.6  | 1,184  | 25,891,298  |
| 45-49 years | Female          | White     | 1980-1984 | 5.0  | 1,233  | 24,553,508  |
| 45-49 years | Female          | White     | 1985-1989 | 5.0  | 1,353  | 27,063,820  |
| 45-49 years | Female          | White     | 1990-1994 | 4.4  | 1,445  | 32,948,000  |
| 45-49 years | Female          | White     | 1995-1999 | 4.5  | 1,790  | 39,640,760  |
| 45-49 years | Female          | White     | 2000-2004 | 5.1  | 2,225  | 43,939,671  |
| 45-49 years | Female          | White     | 2005-2009 | 6.4  | 2,946  | 46,276,471  |
| 45-49 years | Female          | White     | 2010-2016 | 6.5  | 3,865  | 59,533,605  |
| 45-49 years | Female          | Black     | 1975-1979 | 7.2  | 227    | 3,139,776   |
| 45-49 years | Female          | Black     | 1980-1984 | 8.1  | 260    | 3,229,752   |
| 45-49 years | Female          | Black     | 1985-1989 | 9.3  | 335    | 3,600,469   |
| 45-49 years | Female          | Black     | 1990-1994 | 11.0 | 469    | 4,246,697   |
| 45-49 years | Female          | Black     | 1995-1999 | 10.4 | 590    | 5,661,936   |
| 45-49 years | Female          | Black     | 2000-2004 | 9.2  | 627    | 6,817,251   |
| 45-49 years | Female          | Black     | 2005-2009 | 9.0  | 686    | 7,664,721   |
| 45-49 years | Female          | Black     | 2010-2016 | 7.5  | 794    | 10,620,469  |
| 45-49 years | Female          | Other     | 1975-1979 | 1.8  | 10     | 561,394     |
| 45-49 years | Female          | Other     | 1980-1984 | 1.7  | 13     | 753,786     |
| 45-49 years | Female          | Other     | 1985-1989 | 2.2  | 23     | 1,063,580   |
| 45-49 years | Female          | Other     | 1990-1994 | 2.1  | 33     | 1,592,224   |
| 45-49 years | Female          | Other     | 1995-1999 | 2.2  | 52     | 2,342,005   |
| 45-49 years | Female          | Other     | 2000-2004 | 2.1  | 64     | 3,002,723   |
| 45-49 years | Female          | Other     | 2005-2009 | 1.7  | 62     | 3,597,121   |
| 45-49 years | Female          | Other     | 2010-2016 | 1.6  | 91     | 5,835,615   |
| 50-54 years | Male and female | All races | 1975-1979 | 13.5 | 8,021  | 59,368,570  |
| 50-54 years | Male and female | All races | 1980-1984 | 13.7 | 7,756  | 56,814,559  |
| 50-54 years | Male and female | All races | 1985-1989 | 14.2 | 7,765  | 54,642,885  |
| 50-54 years | Male and female | All races | 1990-1994 | 13.1 | 8,040  | 61,416,658  |
| 50-54 years | Male and female | All races | 1995-1999 | 12.3 | 9,444  | 76,578,111  |
| 50-54 years | Male and female | All races | 2000-2004 | 11.8 | 11,063 | 93,868,584  |
| 50-54 years | Male and female | All races | 2005-2009 | 13.3 | 14,050 | 105,434,101 |
| 50-54 years | Male and female | All races | 2010-2016 | 14.5 | 22,716 | 156,779,379 |
| 50-54 years | Male and female | White     | 1975-1979 | 13.2 | 7,003  | 52,952,699  |
| 50-54 years | Male and female | White     | 1980-1984 | 13.4 | 6,672  | 49,934,433  |
| 50-54 years | Male and female | White     | 1985-1989 | 13.7 | 6,476  | 47,339,556  |
| 50-54 years | Male and female | White     | 1990-1994 | 12.7 | 6,724  | 52,768,918  |

|             |                 |           |           |      |        |             |
|-------------|-----------------|-----------|-----------|------|--------|-------------|
| 50-54 years | Male and female | White     | 1995-1999 | 12.1 | 7,906  | 65,391,137  |
| 50-54 years | Male and female | White     | 2000-2004 | 11.6 | 9,110  | 78,527,710  |
| 50-54 years | Male and female | White     | 2005-2009 | 13.5 | 11,695 | 86,643,532  |
| 50-54 years | Male and female | White     | 2010-2016 | 15.2 | 19,256 | 126,399,538 |
| 50-54 years | Male and female | Black     | 1975-1979 | 17.7 | 977    | 5,507,581   |
| 50-54 years | Male and female | Black     | 1980-1984 | 18.2 | 1,025  | 5,638,097   |
| 50-54 years | Male and female | Black     | 1985-1989 | 20.7 | 1,173  | 5,654,737   |
| 50-54 years | Male and female | Black     | 1990-1994 | 19.1 | 1,218  | 6,361,075   |
| 50-54 years | Male and female | Black     | 1995-1999 | 17.7 | 1,388  | 7,849,700   |
| 50-54 years | Male and female | Black     | 2000-2004 | 16.8 | 1,764  | 10,530,635  |
| 50-54 years | Male and female | Black     | 2005-2009 | 16.6 | 2,113  | 12,747,324  |
| 50-54 years | Male and female | Black     | 2010-2016 | 15.4 | 3,101  | 20,121,880  |
| 50-54 years | Male and female | Other     | 1975-1979 | 4.5  | 41     | 908,290     |
| 50-54 years | Male and female | Other     | 1980-1984 | 4.8  | 59     | 1,242,029   |
| 50-54 years | Male and female | Other     | 1985-1989 | 7.0  | 116    | 1,648,592   |
| 50-54 years | Male and female | Other     | 1990-1994 | 4.3  | 98     | 2,286,665   |
| 50-54 years | Male and female | Other     | 1995-1999 | 4.5  | 150    | 3,337,274   |
| 50-54 years | Male and female | Other     | 2000-2004 | 3.9  | 189    | 4,810,239   |
| 50-54 years | Male and female | Other     | 2005-2009 | 4.0  | 242    | 6,043,245   |
| 50-54 years | Male and female | Other     | 2010-2016 | 3.5  | 359    | 10,257,961  |
| 50-54 years | Male            | All races | 1975-1979 | 17.7 | 5,039  | 28,430,296  |
| 50-54 years | Male            | All races | 1980-1984 | 16.6 | 4,555  | 27,368,751  |
| 50-54 years | Male            | All races | 1985-1989 | 15.7 | 4,149  | 26,472,414  |
| 50-54 years | Male            | All races | 1990-1994 | 13.7 | 4,097  | 29,882,124  |
| 50-54 years | Male            | All races | 1995-1999 | 12.5 | 4,691  | 37,402,955  |
| 50-54 years | Male            | All races | 2000-2004 | 12.3 | 5,671  | 45,920,301  |
| 50-54 years | Male            | All races | 2005-2009 | 14.0 | 7,233  | 51,612,958  |
| 50-54 years | Male            | All races | 2010-2016 | 13.8 | 10,612 | 76,929,120  |
| 50-54 years | Male            | White     | 1975-1979 | 17.1 | 4,353  | 25,526,261  |
| 50-54 years | Male            | White     | 1980-1984 | 16.0 | 3,879  | 24,274,955  |
| 50-54 years | Male            | White     | 1985-1989 | 14.7 | 3,397  | 23,140,735  |
| 50-54 years | Male            | White     | 1990-1994 | 13.1 | 3,403  | 25,904,278  |
| 50-54 years | Male            | White     | 1995-1999 | 12.1 | 3,916  | 32,239,526  |
| 50-54 years | Male            | White     | 2000-2004 | 12.0 | 4,655  | 38,819,396  |
| 50-54 years | Male            | White     | 2005-2009 | 14.1 | 6,039  | 42,859,191  |
| 50-54 years | Male            | White     | 2010-2016 | 14.4 | 9,003  | 62,674,400  |
| 50-54 years | Male            | Black     | 1975-1979 | 26.5 | 657    | 2,481,609   |
| 50-54 years | Male            | Black     | 1980-1984 | 25.2 | 637    | 2,526,547   |
| 50-54 years | Male            | Black     | 1985-1989 | 27.3 | 695    | 2,545,883   |
| 50-54 years | Male            | Black     | 1990-1994 | 22.2 | 639    | 2,877,298   |
| 50-54 years | Male            | Black     | 1995-1999 | 19.5 | 698    | 3,583,180   |
| 50-54 years | Male            | Black     | 2000-2004 | 18.6 | 903    | 4,860,298   |
| 50-54 years | Male            | Black     | 2005-2009 | 18.0 | 1,069  | 5,935,602   |

|             |                 |           |           |      |        |            |
|-------------|-----------------|-----------|-----------|------|--------|------------|
| 50-54 years | Male            | Black     | 2010-2016 | 15.1 | 1,427  | 9,424,510  |
| 50-54 years | Male            | Other     | 1975-1979 | 6.9  | 29     | 422,426    |
| 50-54 years | Male            | Other     | 1980-1984 | 6.9  | 39     | 567,249    |
| 50-54 years | Male            | Other     | 1985-1989 | 7.3  | 57     | 785,796    |
| 50-54 years | Male            | Other     | 1990-1994 | 5.0  | 55     | 1,100,548  |
| 50-54 years | Male            | Other     | 1995-1999 | 4.9  | 77     | 1,580,249  |
| 50-54 years | Male            | Other     | 2000-2004 | 5.0  | 113    | 2,240,607  |
| 50-54 years | Male            | Other     | 2005-2009 | 4.4  | 125    | 2,818,165  |
| 50-54 years | Male            | Other     | 2010-2016 | 3.8  | 182    | 4,830,210  |
| 50-54 years | Female          | All races | 1975-1979 | 9.6  | 2,982  | 30,938,274 |
| 50-54 years | Female          | All races | 1980-1984 | 10.9 | 3,201  | 29,445,808 |
| 50-54 years | Female          | All races | 1985-1989 | 12.8 | 3,616  | 28,170,471 |
| 50-54 years | Female          | All races | 1990-1994 | 12.5 | 3,943  | 31,534,534 |
| 50-54 years | Female          | All races | 1995-1999 | 12.1 | 4,753  | 39,175,156 |
| 50-54 years | Female          | All races | 2000-2004 | 11.2 | 5,392  | 47,948,283 |
| 50-54 years | Female          | All races | 2005-2009 | 12.7 | 6,817  | 53,821,143 |
| 50-54 years | Female          | All races | 2010-2016 | 15.2 | 12,104 | 79,850,259 |
| 50-54 years | Female          | White     | 1975-1979 | 9.7  | 2,650  | 27,426,438 |
| 50-54 years | Female          | White     | 1980-1984 | 10.9 | 2,793  | 25,659,478 |
| 50-54 years | Female          | White     | 1985-1989 | 12.7 | 3,079  | 24,198,821 |
| 50-54 years | Female          | White     | 1990-1994 | 12.4 | 3,321  | 26,864,640 |
| 50-54 years | Female          | White     | 1995-1999 | 12.0 | 3,990  | 33,151,611 |
| 50-54 years | Female          | White     | 2000-2004 | 11.2 | 4,455  | 39,708,314 |
| 50-54 years | Female          | White     | 2005-2009 | 12.9 | 5,656  | 43,784,341 |
| 50-54 years | Female          | White     | 2010-2016 | 16.1 | 10,253 | 63,725,138 |
| 50-54 years | Female          | Black     | 1975-1979 | 10.6 | 320    | 3,025,972  |
| 50-54 years | Female          | Black     | 1980-1984 | 12.5 | 388    | 3,111,550  |
| 50-54 years | Female          | Black     | 1985-1989 | 15.4 | 478    | 3,108,854  |
| 50-54 years | Female          | Black     | 1990-1994 | 16.6 | 579    | 3,483,777  |
| 50-54 years | Female          | Black     | 1995-1999 | 16.2 | 690    | 4,266,520  |
| 50-54 years | Female          | Black     | 2000-2004 | 15.2 | 861    | 5,670,337  |
| 50-54 years | Female          | Black     | 2005-2009 | 15.3 | 1,044  | 6,811,722  |
| 50-54 years | Female          | Black     | 2010-2016 | 15.6 | 1,674  | 10,697,370 |
| 50-54 years | Female          | Other     | 1975-1979 | 2.5  | 12     | 485,864    |
| 50-54 years | Female          | Other     | 1980-1984 | 3.0  | 20     | 674,780    |
| 50-54 years | Female          | Other     | 1985-1989 | 6.8  | 59     | 862,796    |
| 50-54 years | Female          | Other     | 1990-1994 | 3.6  | 43     | 1,186,117  |
| 50-54 years | Female          | Other     | 1995-1999 | 4.2  | 73     | 1,757,025  |
| 50-54 years | Female          | Other     | 2000-2004 | 3.0  | 76     | 2,569,632  |
| 50-54 years | Female          | Other     | 2005-2009 | 3.6  | 117    | 3,225,080  |
| 50-54 years | Female          | Other     | 2010-2016 | 3.3  | 177    | 5,427,751  |
| 55-59 years | Male and female | All races | 1975-1979 | 28.5 | 15,705 | 55,188,233 |
| 55-59 years | Male and female | All races | 1980-1984 | 30.0 | 17,233 | 57,437,550 |

|             |                 |           |           |      |        |             |
|-------------|-----------------|-----------|-----------|------|--------|-------------|
| 55-59 years | Male and female | All races | 1985-1989 | 32.5 | 17,717 | 54,588,564  |
| 55-59 years | Male and female | All races | 1990-1994 | 31.8 | 16,909 | 53,187,067  |
| 55-59 years | Male and female | All races | 1995-1999 | 30.0 | 18,046 | 60,242,353  |
| 55-59 years | Male and female | All races | 2000-2004 | 27.9 | 20,930 | 75,099,712  |
| 55-59 years | Male and female | All races | 2005-2009 | 26.3 | 24,304 | 92,450,023  |
| 55-59 years | Male and female | All races | 2010-2016 | 29.5 | 43,420 | 147,278,183 |
| 55-59 years | Male and female | White     | 1975-1979 | 28.7 | 14,221 | 49,549,841  |
| 55-59 years | Male and female | White     | 1980-1984 | 30.1 | 15,379 | 51,100,947  |
| 55-59 years | Male and female | White     | 1985-1989 | 32.5 | 15,598 | 47,931,591  |
| 55-59 years | Male and female | White     | 1990-1994 | 32.1 | 14,779 | 46,031,230  |
| 55-59 years | Male and female | White     | 1995-1999 | 30.4 | 15,691 | 51,680,339  |
| 55-59 years | Male and female | White     | 2000-2004 | 28.6 | 18,282 | 64,015,750  |
| 55-59 years | Male and female | White     | 2005-2009 | 27.4 | 21,113 | 77,154,798  |
| 55-59 years | Male and female | White     | 2010-2016 | 31.2 | 37,504 | 120,394,037 |
| 55-59 years | Male and female | Black     | 1975-1979 | 29.0 | 1,420  | 4,899,414   |
| 55-59 years | Male and female | Black     | 1980-1984 | 33.0 | 1,739  | 5,277,555   |
| 55-59 years | Male and female | Black     | 1985-1989 | 36.8 | 1,939  | 5,270,459   |
| 55-59 years | Male and female | Black     | 1990-1994 | 35.5 | 1,906  | 5,361,802   |
| 55-59 years | Male and female | Black     | 1995-1999 | 34.2 | 2,096  | 6,128,596   |
| 55-59 years | Male and female | Black     | 2000-2004 | 30.5 | 2,317  | 7,589,971   |
| 55-59 years | Male and female | Black     | 2005-2009 | 27.5 | 2,823  | 10,277,141  |
| 55-59 years | Male and female | Black     | 2010-2016 | 29.2 | 5,212  | 17,861,816  |
| 55-59 years | Male and female | Other     | 1975-1979 | 8.7  | 64     | 738,978     |
| 55-59 years | Male and female | Other     | 1980-1984 | 10.9 | 115    | 1,059,048   |
| 55-59 years | Male and female | Other     | 1985-1989 | 13.0 | 180    | 1,386,514   |
| 55-59 years | Male and female | Other     | 1990-1994 | 12.5 | 224    | 1,794,035   |
| 55-59 years | Male and female | Other     | 1995-1999 | 10.6 | 259    | 2,433,418   |
| 55-59 years | Male and female | Other     | 2000-2004 | 9.5  | 331    | 3,493,991   |
| 55-59 years | Male and female | Other     | 2005-2009 | 7.3  | 368    | 5,018,084   |
| 55-59 years | Male and female | Other     | 2010-2016 | 7.8  | 704    | 9,022,330   |
| 55-59 years | Male            | All races | 1975-1979 | 40.3 | 10,524 | 26,113,638  |
| 55-59 years | Male            | All races | 1980-1984 | 39.3 | 10,636 | 27,093,324  |
| 55-59 years | Male            | All races | 1985-1989 | 38.5 | 9,997  | 25,987,806  |
| 55-59 years | Male            | All races | 1990-1994 | 35.8 | 9,117  | 25,495,513  |
| 55-59 years | Male            | All races | 1995-1999 | 32.1 | 9,322  | 29,038,066  |
| 55-59 years | Male            | All races | 2000-2004 | 29.6 | 10,779 | 36,389,812  |
| 55-59 years | Male            | All races | 2005-2009 | 28.5 | 12,791 | 44,811,171  |
| 55-59 years | Male            | All races | 2010-2016 | 30.6 | 21,898 | 71,448,760  |
| 55-59 years | Male            | White     | 1975-1979 | 40.2 | 9,451  | 23,539,009  |
| 55-59 years | Male            | White     | 1980-1984 | 38.8 | 9,405  | 24,239,335  |
| 55-59 years | Male            | White     | 1985-1989 | 37.9 | 8,734  | 23,017,314  |
| 55-59 years | Male            | White     | 1990-1994 | 35.4 | 7,891  | 22,281,313  |
| 55-59 years | Male            | White     | 1995-1999 | 32.0 | 8,037  | 25,141,241  |

|             |        |           |           |      |        |            |
|-------------|--------|-----------|-----------|------|--------|------------|
| 55-59 years | Male   | White     | 2000-2004 | 29.7 | 9,306  | 31,311,502 |
| 55-59 years | Male   | White     | 2005-2009 | 29.2 | 11,054 | 37,804,279 |
| 55-59 years | Male   | White     | 2010-2016 | 32.1 | 18,957 | 59,043,433 |
| 55-59 years | Male   | Black     | 1975-1979 | 46.4 | 1,030  | 2,218,177  |
| 55-59 years | Male   | Black     | 1980-1984 | 48.8 | 1,155  | 2,367,739  |
| 55-59 years | Male   | Black     | 1985-1989 | 49.1 | 1,153  | 2,347,321  |
| 55-59 years | Male   | Black     | 1990-1994 | 46.5 | 1,105  | 2,377,275  |
| 55-59 years | Male   | Black     | 1995-1999 | 41.4 | 1,134  | 2,742,052  |
| 55-59 years | Male   | Black     | 2000-2004 | 37.5 | 1,290  | 3,442,431  |
| 55-59 years | Male   | Black     | 2005-2009 | 32.7 | 1,539  | 4,699,954  |
| 55-59 years | Male   | Black     | 2010-2016 | 31.1 | 2,561  | 8,237,813  |
| 55-59 years | Male   | Other     | 1975-1979 | 12.1 | 43     | 356,452    |
| 55-59 years | Male   | Other     | 1980-1984 | 15.6 | 76     | 486,250    |
| 55-59 years | Male   | Other     | 1985-1989 | 17.7 | 110    | 623,171    |
| 55-59 years | Male   | Other     | 1990-1994 | 14.5 | 121    | 836,925    |
| 55-59 years | Male   | Other     | 1995-1999 | 13.1 | 151    | 1,154,773  |
| 55-59 years | Male   | Other     | 2000-2004 | 11.2 | 183    | 1,635,879  |
| 55-59 years | Male   | Other     | 2005-2009 | 8.6  | 198    | 2,306,938  |
| 55-59 years | Male   | Other     | 2010-2016 | 9.1  | 380    | 4,167,514  |
| 55-59 years | Female | All races | 1975-1979 | 17.8 | 5,181  | 29,074,595 |
| 55-59 years | Female | All races | 1980-1984 | 21.7 | 6,597  | 30,344,226 |
| 55-59 years | Female | All races | 1985-1989 | 27.0 | 7,720  | 28,600,758 |
| 55-59 years | Female | All races | 1990-1994 | 28.1 | 7,792  | 27,691,554 |
| 55-59 years | Female | All races | 1995-1999 | 28.0 | 8,724  | 31,204,287 |
| 55-59 years | Female | All races | 2000-2004 | 26.2 | 10,151 | 38,709,900 |
| 55-59 years | Female | All races | 2005-2009 | 24.2 | 11,513 | 47,638,852 |
| 55-59 years | Female | All races | 2010-2016 | 28.4 | 21,522 | 75,829,423 |
| 55-59 years | Female | White     | 1975-1979 | 18.3 | 4,770  | 26,010,832 |
| 55-59 years | Female | White     | 1980-1984 | 22.2 | 5,974  | 26,861,612 |
| 55-59 years | Female | White     | 1985-1989 | 27.6 | 6,864  | 24,914,277 |
| 55-59 years | Female | White     | 1990-1994 | 29.0 | 6,888  | 23,749,917 |
| 55-59 years | Female | White     | 1995-1999 | 28.8 | 7,654  | 26,539,098 |
| 55-59 years | Female | White     | 2000-2004 | 27.4 | 8,976  | 32,704,248 |
| 55-59 years | Female | White     | 2005-2009 | 25.6 | 10,059 | 39,350,519 |
| 55-59 years | Female | White     | 2010-2016 | 30.2 | 18,547 | 61,350,604 |
| 55-59 years | Female | Black     | 1975-1979 | 14.5 | 390    | 2,681,237  |
| 55-59 years | Female | Black     | 1980-1984 | 20.1 | 584    | 2,909,816  |
| 55-59 years | Female | Black     | 1985-1989 | 26.9 | 786    | 2,923,138  |
| 55-59 years | Female | Black     | 1990-1994 | 26.8 | 801    | 2,984,527  |
| 55-59 years | Female | Black     | 1995-1999 | 28.4 | 962    | 3,386,544  |
| 55-59 years | Female | Black     | 2000-2004 | 24.8 | 1,027  | 4,147,540  |
| 55-59 years | Female | Black     | 2005-2009 | 23.0 | 1,284  | 5,577,187  |
| 55-59 years | Female | Black     | 2010-2016 | 27.5 | 2,651  | 9,624,003  |

|             |                 |           |           |      |        |             |
|-------------|-----------------|-----------|-----------|------|--------|-------------|
| 55-59 years | Female          | Other     | 1975-1979 | 5.5  | 21     | 382,526     |
| 55-59 years | Female          | Other     | 1980-1984 | 6.8  | 39     | 572,798     |
| 55-59 years | Female          | Other     | 1985-1989 | 9.2  | 70     | 763,343     |
| 55-59 years | Female          | Other     | 1990-1994 | 10.8 | 103    | 957,110     |
| 55-59 years | Female          | Other     | 1995-1999 | 8.4  | 108    | 1,278,645   |
| 55-59 years | Female          | Other     | 2000-2004 | 8.0  | 148    | 1,858,112   |
| 55-59 years | Female          | Other     | 2005-2009 | 6.3  | 170    | 2,711,146   |
| 55-59 years | Female          | Other     | 2010-2016 | 6.7  | 324    | 4,854,816   |
| 60-64 years | Male and female | All races | 1975-1979 | 56.7 | 27,397 | 48,354,085  |
| 60-64 years | Male and female | All races | 1980-1984 | 59.0 | 31,016 | 52,528,574  |
| 60-64 years | Male and female | All races | 1985-1989 | 65.2 | 35,230 | 54,047,409  |
| 60-64 years | Male and female | All races | 1990-1994 | 67.0 | 34,955 | 52,146,101  |
| 60-64 years | Male and female | All races | 1995-1999 | 65.1 | 33,556 | 51,555,947  |
| 60-64 years | Male and female | All races | 2000-2004 | 61.7 | 36,086 | 58,452,230  |
| 60-64 years | Male and female | All races | 2005-2009 | 57.4 | 41,797 | 72,812,684  |
| 60-64 years | Male and female | All races | 2010-2016 | 53.8 | 68,779 | 127,834,769 |
| 60-64 years | Male and female | White     | 1975-1979 | 58.4 | 25,423 | 43,512,307  |
| 60-64 years | Male and female | White     | 1980-1984 | 60.2 | 28,401 | 47,149,282  |
| 60-64 years | Male and female | White     | 1985-1989 | 66.5 | 31,932 | 48,040,311  |
| 60-64 years | Male and female | White     | 1990-1994 | 69.2 | 31,617 | 45,703,788  |
| 60-64 years | Male and female | White     | 1995-1999 | 67.7 | 30,122 | 44,488,083  |
| 60-64 years | Male and female | White     | 2000-2004 | 65.0 | 32,523 | 50,019,194  |
| 60-64 years | Male and female | White     | 2005-2009 | 60.9 | 37,752 | 61,975,542  |
| 60-64 years | Male and female | White     | 2010-2016 | 57.2 | 60,717 | 106,226,312 |
| 60-64 years | Male and female | Black     | 1975-1979 | 43.8 | 1,864  | 4,253,957   |
| 60-64 years | Male and female | Black     | 1980-1984 | 54.0 | 2,446  | 4,527,480   |
| 60-64 years | Male and female | Black     | 1985-1989 | 62.2 | 2,992  | 4,806,964   |
| 60-64 years | Male and female | Black     | 1990-1994 | 60.5 | 2,976  | 4,920,184   |
| 60-64 years | Male and female | Black     | 1995-1999 | 58.2 | 2,987  | 5,129,832   |
| 60-64 years | Male and female | Black     | 2000-2004 | 52.8 | 3,087  | 5,843,569   |
| 60-64 years | Male and female | Black     | 2005-2009 | 48.4 | 3,499  | 7,231,809   |
| 60-64 years | Male and female | Black     | 2010-2016 | 49.3 | 6,986  | 14,162,265  |
| 60-64 years | Male and female | Other     | 1975-1979 | 18.7 | 110    | 587,821     |
| 60-64 years | Male and female | Other     | 1980-1984 | 19.8 | 169    | 851,812     |
| 60-64 years | Male and female | Other     | 1985-1989 | 25.5 | 306    | 1,200,134   |
| 60-64 years | Male and female | Other     | 1990-1994 | 23.8 | 362    | 1,522,129   |
| 60-64 years | Male and female | Other     | 1995-1999 | 23.1 | 447    | 1,938,032   |
| 60-64 years | Male and female | Other     | 2000-2004 | 18.4 | 476    | 2,589,467   |
| 60-64 years | Male and female | Other     | 2005-2009 | 15.1 | 546    | 3,605,333   |
| 60-64 years | Male and female | Other     | 2010-2016 | 14.5 | 1,076  | 7,446,192   |
| 60-64 years | Male            | All races | 1975-1979 | 86.4 | 19,370 | 22,431,135  |
| 60-64 years | Male            | All races | 1980-1984 | 81.9 | 19,966 | 24,375,120  |
| 60-64 years | Male            | All races | 1985-1989 | 83.0 | 20,798 | 25,046,997  |

|             |        |           |           |      |        |            |
|-------------|--------|-----------|-----------|------|--------|------------|
| 60-64 years | Male   | All races | 1990-1994 | 79.2 | 19,354 | 24,437,615 |
| 60-64 years | Male   | All races | 1995-1999 | 73.1 | 17,854 | 24,410,237 |
| 60-64 years | Male   | All races | 2000-2004 | 66.6 | 18,542 | 27,854,925 |
| 60-64 years | Male   | All races | 2005-2009 | 62.0 | 21,630 | 34,891,097 |
| 60-64 years | Male   | All races | 2010-2016 | 59.2 | 36,197 | 61,193,341 |
| 60-64 years | Male   | White     | 1975-1979 | 88.4 | 17,904 | 20,246,193 |
| 60-64 years | Male   | White     | 1980-1984 | 82.5 | 18,147 | 21,992,215 |
| 60-64 years | Male   | White     | 1985-1989 | 83.4 | 18,707 | 22,428,464 |
| 60-64 years | Male   | White     | 1990-1994 | 80.2 | 17,341 | 21,632,915 |
| 60-64 years | Male   | White     | 1995-1999 | 74.5 | 15,839 | 21,270,383 |
| 60-64 years | Male   | White     | 2000-2004 | 68.6 | 16,505 | 24,052,682 |
| 60-64 years | Male   | White     | 2005-2009 | 64.4 | 19,315 | 29,997,821 |
| 60-64 years | Male   | White     | 2010-2016 | 61.9 | 31,848 | 51,455,919 |
| 60-64 years | Male   | Black     | 1975-1979 | 73.6 | 1,396  | 1,896,970  |
| 60-64 years | Male   | Black     | 1980-1984 | 85.5 | 1,701  | 1,988,440  |
| 60-64 years | Male   | Black     | 1985-1989 | 91.4 | 1,903  | 2,081,951  |
| 60-64 years | Male   | Black     | 1990-1994 | 84.6 | 1,805  | 2,133,385  |
| 60-64 years | Male   | Black     | 1995-1999 | 78.3 | 1,761  | 2,248,244  |
| 60-64 years | Male   | Black     | 2000-2004 | 67.8 | 1,753  | 2,584,501  |
| 60-64 years | Male   | Black     | 2005-2009 | 61.8 | 1,996  | 3,229,971  |
| 60-64 years | Male   | Black     | 2010-2016 | 59.1 | 3,756  | 6,359,484  |
| 60-64 years | Male   | Other     | 1975-1979 | 24.3 | 70     | 287,972    |
| 60-64 years | Male   | Other     | 1980-1984 | 29.9 | 118    | 394,465    |
| 60-64 years | Male   | Other     | 1985-1989 | 35.0 | 188    | 536,582    |
| 60-64 years | Male   | Other     | 1990-1994 | 31.0 | 208    | 671,315    |
| 60-64 years | Male   | Other     | 1995-1999 | 28.5 | 254    | 891,610    |
| 60-64 years | Male   | Other     | 2000-2004 | 23.3 | 284    | 1,217,742  |
| 60-64 years | Male   | Other     | 2005-2009 | 19.2 | 319    | 1,663,305  |
| 60-64 years | Male   | Other     | 2010-2016 | 17.6 | 593    | 3,377,938  |
| 60-64 years | Female | All races | 1975-1979 | 31.0 | 8,027  | 25,922,950 |
| 60-64 years | Female | All races | 1980-1984 | 39.2 | 11,050 | 28,153,454 |
| 60-64 years | Female | All races | 1985-1989 | 49.8 | 14,432 | 29,000,412 |
| 60-64 years | Female | All races | 1990-1994 | 56.3 | 15,601 | 27,708,486 |
| 60-64 years | Female | All races | 1995-1999 | 57.8 | 15,702 | 27,145,710 |
| 60-64 years | Female | All races | 2000-2004 | 57.3 | 17,544 | 30,597,305 |
| 60-64 years | Female | All races | 2005-2009 | 53.2 | 20,167 | 37,921,587 |
| 60-64 years | Female | All races | 2010-2016 | 48.9 | 32,582 | 66,641,428 |
| 60-64 years | Female | White     | 1975-1979 | 32.3 | 7,519  | 23,266,114 |
| 60-64 years | Female | White     | 1980-1984 | 40.8 | 10,254 | 25,157,067 |
| 60-64 years | Female | White     | 1985-1989 | 51.6 | 13,225 | 25,611,847 |
| 60-64 years | Female | White     | 1990-1994 | 59.3 | 14,276 | 24,070,873 |
| 60-64 years | Female | White     | 1995-1999 | 61.5 | 14,283 | 23,217,700 |
| 60-64 years | Female | White     | 2000-2004 | 61.7 | 16,018 | 25,966,512 |

|             |                 |           |           |       |         |             |
|-------------|-----------------|-----------|-----------|-------|---------|-------------|
| 60-64 years | Female          | White     | 2005-2009 | 57.7  | 18,437  | 31,977,721  |
| 60-64 years | Female          | White     | 2010-2016 | 52.7  | 28,869  | 54,770,393  |
| 60-64 years | Female          | Black     | 1975-1979 | 19.9  | 468     | 2,356,987   |
| 60-64 years | Female          | Black     | 1980-1984 | 29.3  | 745     | 2,539,040   |
| 60-64 years | Female          | Black     | 1985-1989 | 40.0  | 1,089   | 2,725,013   |
| 60-64 years | Female          | Black     | 1990-1994 | 42.0  | 1,171   | 2,786,799   |
| 60-64 years | Female          | Black     | 1995-1999 | 42.5  | 1,226   | 2,881,588   |
| 60-64 years | Female          | Black     | 2000-2004 | 40.9  | 1,334   | 3,259,068   |
| 60-64 years | Female          | Black     | 2005-2009 | 37.6  | 1,503   | 4,001,838   |
| 60-64 years | Female          | Black     | 2010-2016 | 41.4  | 3,230   | 7,802,781   |
| 60-64 years | Female          | Other     | 1975-1979 | 13.3  | 40      | 299,849     |
| 60-64 years | Female          | Other     | 1980-1984 | 11.2  | 51      | 457,347     |
| 60-64 years | Female          | Other     | 1985-1989 | 17.8  | 118     | 663,552     |
| 60-64 years | Female          | Other     | 1990-1994 | 18.1  | 154     | 850,814     |
| 60-64 years | Female          | Other     | 1995-1999 | 18.4  | 193     | 1,046,422   |
| 60-64 years | Female          | Other     | 2000-2004 | 14.0  | 192     | 1,371,725   |
| 60-64 years | Female          | Other     | 2005-2009 | 11.7  | 227     | 1,942,028   |
| 60-64 years | Female          | Other     | 2010-2016 | 11.9  | 483     | 4,068,254   |
| 65-69 years | Male and female | All races | 1975-1979 | 95.6  | 39,686  | 41,502,333  |
| 65-69 years | Male and female | All races | 1980-1984 | 106.9 | 48,167  | 45,053,831  |
| 65-69 years | Male and female | All races | 1985-1989 | 115.3 | 55,818  | 48,407,302  |
| 65-69 years | Male and female | All races | 1990-1994 | 122.8 | 61,597  | 50,164,366  |
| 65-69 years | Male and female | All races | 1995-1999 | 124.5 | 60,998  | 49,009,165  |
| 65-69 years | Male and female | All races | 2000-2004 | 119.7 | 58,204  | 48,628,848  |
| 65-69 years | Male and female | All races | 2005-2009 | 112.9 | 62,674  | 55,488,787  |
| 65-69 years | Male and female | All races | 2010-2016 | 102.8 | 105,037 | 102,195,357 |
| 65-69 years | Male and female | White     | 1975-1979 | 100.2 | 37,389  | 37,312,733  |
| 65-69 years | Male and female | White     | 1980-1984 | 111.4 | 45,053  | 40,456,800  |
| 65-69 years | Male and female | White     | 1985-1989 | 118.8 | 51,507  | 43,350,310  |
| 65-69 years | Male and female | White     | 1990-1994 | 127.3 | 56,706  | 44,544,395  |
| 65-69 years | Male and female | White     | 1995-1999 | 130.5 | 55,960  | 42,896,700  |
| 65-69 years | Male and female | White     | 2000-2004 | 127.3 | 53,295  | 41,866,447  |
| 65-69 years | Male and female | White     | 2005-2009 | 120.9 | 57,312  | 47,418,200  |
| 65-69 years | Male and female | White     | 2010-2016 | 110.1 | 95,276  | 86,525,931  |
| 65-69 years | Male and female | Black     | 1975-1979 | 58.1  | 2,155   | 3,707,977   |
| 65-69 years | Male and female | Black     | 1980-1984 | 72.3  | 2,845   | 3,933,236   |
| 65-69 years | Male and female | Black     | 1985-1989 | 94.8  | 3,904   | 4,119,431   |
| 65-69 years | Male and female | Black     | 1990-1994 | 98.4  | 4,299   | 4,368,702   |
| 65-69 years | Male and female | Black     | 1995-1999 | 95.2  | 4,318   | 4,537,812   |
| 65-69 years | Male and female | Black     | 2000-2004 | 87.8  | 4,181   | 4,759,258   |
| 65-69 years | Male and female | Black     | 2005-2009 | 84.2  | 4,568   | 5,426,555   |
| 65-69 years | Male and female | Black     | 2010-2016 | 81.7  | 8,275   | 10,125,763  |
| 65-69 years | Male and female | Other     | 1975-1979 | 29.5  | 142     | 481,623     |



|             |                 |           |           |       |        |            |
|-------------|-----------------|-----------|-----------|-------|--------|------------|
| 65-69 years | Male and female | Other     | 1980-1984 | 40.5  | 269    | 663,795    |
| 65-69 years | Male and female | Other     | 1985-1989 | 43.4  | 407    | 937,561    |
| 65-69 years | Male and female | Other     | 1990-1994 | 47.3  | 592    | 1,251,269  |
| 65-69 years | Male and female | Other     | 1995-1999 | 45.7  | 720    | 1,574,653  |
| 65-69 years | Male and female | Other     | 2000-2004 | 36.3  | 728    | 2,003,143  |
| 65-69 years | Male and female | Other     | 2005-2009 | 30.0  | 794    | 2,644,032  |
| 65-69 years | Male and female | Other     | 2010-2016 | 26.8  | 1,486  | 5,543,663  |
| 65-69 years | Male            | All races | 1975-1979 | 160.2 | 29,488 | 18,411,774 |
| 65-69 years | Male            | All races | 1980-1984 | 158.7 | 31,841 | 20,058,942 |
| 65-69 years | Male            | All races | 1985-1989 | 156.1 | 33,875 | 21,702,282 |
| 65-69 years | Male            | All races | 1990-1994 | 153.3 | 34,569 | 22,554,707 |
| 65-69 years | Male            | All races | 1995-1999 | 146.5 | 32,897 | 22,456,458 |
| 65-69 years | Male            | All races | 2000-2004 | 132.3 | 29,877 | 22,580,860 |
| 65-69 years | Male            | All races | 2005-2009 | 122.9 | 31,993 | 26,029,494 |
| 65-69 years | Male            | All races | 2010-2016 | 112.0 | 54,044 | 48,258,343 |
| 65-69 years | Male            | White     | 1975-1979 | 166.9 | 27,647 | 16,563,400 |
| 65-69 years | Male            | White     | 1980-1984 | 163.4 | 29,541 | 18,082,433 |
| 65-69 years | Male            | White     | 1985-1989 | 158.3 | 30,943 | 19,541,490 |
| 65-69 years | Male            | White     | 1990-1994 | 156.4 | 31,535 | 20,164,002 |
| 65-69 years | Male            | White     | 1995-1999 | 150.7 | 29,894 | 19,842,053 |
| 65-69 years | Male            | White     | 2000-2004 | 137.8 | 27,069 | 19,637,961 |
| 65-69 years | Male            | White     | 2005-2009 | 129.0 | 28,967 | 22,461,533 |
| 65-69 years | Male            | White     | 2010-2016 | 117.4 | 48,530 | 41,330,272 |
| 65-69 years | Male            | Black     | 1975-1979 | 107.9 | 1,731  | 1,604,153  |
| 65-69 years | Male            | Black     | 1980-1984 | 126.4 | 2,112  | 1,670,254  |
| 65-69 years | Male            | Black     | 1985-1989 | 153.5 | 2,668  | 1,737,966  |
| 65-69 years | Male            | Black     | 1990-1994 | 143.9 | 2,655  | 1,844,632  |
| 65-69 years | Male            | Black     | 1995-1999 | 133.0 | 2,569  | 1,932,039  |
| 65-69 years | Male            | Black     | 2000-2004 | 117.9 | 2,403  | 2,037,720  |
| 65-69 years | Male            | Black     | 2005-2009 | 110.0 | 2,581  | 2,345,856  |
| 65-69 years | Male            | Black     | 2010-2016 | 105.6 | 4,663  | 4,417,362  |
| 65-69 years | Male            | Other     | 1975-1979 | 45.0  | 110    | 244,221    |
| 65-69 years | Male            | Other     | 1980-1984 | 61.4  | 188    | 306,255    |
| 65-69 years | Male            | Other     | 1985-1989 | 62.4  | 264    | 422,826    |
| 65-69 years | Male            | Other     | 1990-1994 | 69.4  | 379    | 546,073    |
| 65-69 years | Male            | Other     | 1995-1999 | 63.6  | 434    | 682,366    |
| 65-69 years | Male            | Other     | 2000-2004 | 44.7  | 405    | 905,179    |
| 65-69 years | Male            | Other     | 2005-2009 | 36.4  | 445    | 1,222,105  |
| 65-69 years | Male            | Other     | 2010-2016 | 33.9  | 851    | 2,510,709  |
| 65-69 years | Female          | All races | 1975-1979 | 44.2  | 10,198 | 23,090,559 |
| 65-69 years | Female          | All races | 1980-1984 | 65.3  | 16,326 | 24,994,889 |
| 65-69 years | Female          | All races | 1985-1989 | 82.2  | 21,943 | 26,705,020 |
| 65-69 years | Female          | All races | 1990-1994 | 97.9  | 27,028 | 27,609,659 |

|             |                 |           |           |       |         |            |
|-------------|-----------------|-----------|-----------|-------|---------|------------|
| 65-69 years | Female          | All races | 1995-1999 | 105.8 | 28,101  | 26,552,707 |
| 65-69 years | Female          | All races | 2000-2004 | 108.7 | 28,327  | 26,047,988 |
| 65-69 years | Female          | All races | 2005-2009 | 104.1 | 30,681  | 29,459,293 |
| 65-69 years | Female          | All races | 2010-2016 | 94.5  | 50,993  | 53,937,014 |
| 65-69 years | Female          | White     | 1975-1979 | 47.0  | 9,742   | 20,749,333 |
| 65-69 years | Female          | White     | 1980-1984 | 69.3  | 15,512  | 22,374,367 |
| 65-69 years | Female          | White     | 1985-1989 | 86.4  | 20,564  | 23,808,820 |
| 65-69 years | Female          | White     | 1990-1994 | 103.2 | 25,171  | 24,380,393 |
| 65-69 years | Female          | White     | 1995-1999 | 113.1 | 26,066  | 23,054,647 |
| 65-69 years | Female          | White     | 2000-2004 | 118.0 | 26,226  | 22,228,486 |
| 65-69 years | Female          | White     | 2005-2009 | 113.6 | 28,345  | 24,956,667 |
| 65-69 years | Female          | White     | 2010-2016 | 103.4 | 46,746  | 45,195,659 |
| 65-69 years | Female          | Black     | 1975-1979 | 20.2  | 424     | 2,103,824  |
| 65-69 years | Female          | Black     | 1980-1984 | 32.4  | 733     | 2,262,982  |
| 65-69 years | Female          | Black     | 1985-1989 | 51.9  | 1,236   | 2,381,465  |
| 65-69 years | Female          | Black     | 1990-1994 | 65.1  | 1,644   | 2,524,070  |
| 65-69 years | Female          | Black     | 1995-1999 | 67.1  | 1,749   | 2,605,773  |
| 65-69 years | Female          | Black     | 2000-2004 | 65.3  | 1,778   | 2,721,538  |
| 65-69 years | Female          | Black     | 2005-2009 | 64.5  | 1,987   | 3,080,699  |
| 65-69 years | Female          | Black     | 2010-2016 | 63.3  | 3,612   | 5,708,401  |
| 65-69 years | Female          | Other     | 1975-1979 | 13.5  | 32      | 237,402    |
| 65-69 years | Female          | Other     | 1980-1984 | 22.7  | 81      | 357,540    |
| 65-69 years | Female          | Other     | 1985-1989 | 27.8  | 143     | 514,735    |
| 65-69 years | Female          | Other     | 1990-1994 | 30.2  | 213     | 705,196    |
| 65-69 years | Female          | Other     | 1995-1999 | 32.1  | 286     | 892,287    |
| 65-69 years | Female          | Other     | 2000-2004 | 29.4  | 323     | 1,097,964  |
| 65-69 years | Female          | Other     | 2005-2009 | 24.5  | 349     | 1,421,927  |
| 65-69 years | Female          | Other     | 2010-2016 | 20.9  | 635     | 3,032,954  |
| 70-74 years | Male and female | All races | 1975-1979 | 142.0 | 45,065  | 31,735,649 |
| 70-74 years | Male and female | All races | 1980-1984 | 170.8 | 60,945  | 35,677,877 |
| 70-74 years | Male and female | All races | 1985-1989 | 195.2 | 75,154  | 38,508,900 |
| 70-74 years | Male and female | All races | 1990-1994 | 201.7 | 85,109  | 42,201,953 |
| 70-74 years | Male and female | All races | 1995-1999 | 211.0 | 93,606  | 44,354,441 |
| 70-74 years | Male and female | All races | 2000-2004 | 210.1 | 91,801  | 43,696,251 |
| 70-74 years | Male and female | All races | 2005-2009 | 198.5 | 87,425  | 44,033,442 |
| 70-74 years | Male and female | All races | 2010-2016 | 189.4 | 140,013 | 73,937,771 |
| 70-74 years | Male and female | White     | 1975-1979 | 149.0 | 42,858  | 28,773,243 |
| 70-74 years | Male and female | White     | 1980-1984 | 178.6 | 57,559  | 32,233,076 |
| 70-74 years | Male and female | White     | 1985-1989 | 202.8 | 70,414  | 34,718,807 |
| 70-74 years | Male and female | White     | 1990-1994 | 209.4 | 79,431  | 37,938,430 |
| 70-74 years | Male and female | White     | 1995-1999 | 220.0 | 87,029  | 39,559,939 |
| 70-74 years | Male and female | White     | 2000-2004 | 222.4 | 85,235  | 38,328,725 |
| 70-74 years | Male and female | White     | 2005-2009 | 213.4 | 80,935  | 37,934,868 |

|             |                 |           |           |       |         |            |
|-------------|-----------------|-----------|-----------|-------|---------|------------|
| 70-74 years | Male and female | White     | 2010-2016 | 203.7 | 128,623 | 63,138,727 |
| 70-74 years | Male and female | Black     | 1975-1979 | 76.3  | 1,994   | 2,612,899  |
| 70-74 years | Male and female | Black     | 1980-1984 | 103.4 | 3,062   | 2,961,228  |
| 70-74 years | Male and female | Black     | 1985-1989 | 134.8 | 4,219   | 3,130,764  |
| 70-74 years | Male and female | Black     | 1990-1994 | 145.4 | 4,883   | 3,358,469  |
| 70-74 years | Male and female | Black     | 1995-1999 | 155.1 | 5,544   | 3,573,540  |
| 70-74 years | Male and female | Black     | 2000-2004 | 142.5 | 5,438   | 3,817,235  |
| 70-74 years | Male and female | Black     | 2005-2009 | 129.1 | 5,354   | 4,146,251  |
| 70-74 years | Male and female | Black     | 2010-2016 | 134.8 | 9,377   | 6,958,600  |
| 70-74 years | Male and female | Other     | 1975-1979 | 60.9  | 213     | 349,507    |
| 70-74 years | Male and female | Other     | 1980-1984 | 67.0  | 324     | 483,573    |
| 70-74 years | Male and female | Other     | 1985-1989 | 79.0  | 521     | 659,329    |
| 70-74 years | Male and female | Other     | 1990-1994 | 87.8  | 795     | 905,054    |
| 70-74 years | Male and female | Other     | 1995-1999 | 84.6  | 1,033   | 1,220,962  |
| 70-74 years | Male and female | Other     | 2000-2004 | 72.8  | 1,128   | 1,550,291  |
| 70-74 years | Male and female | Other     | 2005-2009 | 58.2  | 1,136   | 1,952,323  |
| 70-74 years | Male and female | Other     | 2010-2016 | 52.4  | 2,013   | 3,840,444  |
| 70-74 years | Male            | All races | 1975-1979 | 258.2 | 34,407  | 13,328,186 |
| 70-74 years | Male            | All races | 1980-1984 | 277.6 | 41,569  | 14,973,279 |
| 70-74 years | Male            | All races | 1985-1989 | 283.6 | 46,112  | 16,261,107 |
| 70-74 years | Male            | All races | 1990-1994 | 263.9 | 47,939  | 18,163,393 |
| 70-74 years | Male            | All races | 1995-1999 | 260.2 | 50,276  | 19,321,502 |
| 70-74 years | Male            | All races | 2000-2004 | 243.6 | 47,385  | 19,450,564 |
| 70-74 years | Male            | All races | 2005-2009 | 220.9 | 44,108  | 19,968,325 |
| 70-74 years | Male            | All races | 2010-2016 | 207.1 | 70,421  | 34,002,448 |
| 70-74 years | Male            | White     | 1975-1979 | 270.8 | 32,618  | 12,046,519 |
| 70-74 years | Male            | White     | 1980-1984 | 288.1 | 38,988  | 13,532,804 |
| 70-74 years | Male            | White     | 1985-1989 | 290.3 | 42,732  | 14,720,381 |
| 70-74 years | Male            | White     | 1990-1994 | 269.2 | 44,223  | 16,427,388 |
| 70-74 years | Male            | White     | 1995-1999 | 266.6 | 46,325  | 17,375,249 |
| 70-74 years | Male            | White     | 2000-2004 | 252.3 | 43,518  | 17,246,601 |
| 70-74 years | Male            | White     | 2005-2009 | 232.8 | 40,480  | 17,390,409 |
| 70-74 years | Male            | White     | 2010-2016 | 218.2 | 64,046  | 29,357,583 |
| 70-74 years | Male            | Black     | 1975-1979 | 147.6 | 1,628   | 1,103,197  |
| 70-74 years | Male            | Black     | 1980-1984 | 193.0 | 2,329   | 1,206,785  |
| 70-74 years | Male            | Black     | 1985-1989 | 242.7 | 3,020   | 1,244,125  |
| 70-74 years | Male            | Black     | 1990-1994 | 238.3 | 3,180   | 1,334,504  |
| 70-74 years | Male            | Black     | 1995-1999 | 232.3 | 3,295   | 1,418,422  |
| 70-74 years | Male            | Black     | 2000-2004 | 206.9 | 3,188   | 1,541,142  |
| 70-74 years | Male            | Black     | 2005-2009 | 173.8 | 2,975   | 1,711,886  |
| 70-74 years | Male            | Black     | 2010-2016 | 180.0 | 5,238   | 2,909,379  |
| 70-74 years | Male            | Other     | 1975-1979 | 90.2  | 161     | 178,470    |
| 70-74 years | Male            | Other     | 1980-1984 | 107.8 | 252     | 233,690    |

|             |                 |           |           |       |         |            |
|-------------|-----------------|-----------|-----------|-------|---------|------------|
| 70-74 years | Male            | Other     | 1985-1989 | 121.4 | 360     | 296,601    |
| 70-74 years | Male            | Other     | 1990-1994 | 133.5 | 536     | 401,501    |
| 70-74 years | Male            | Other     | 1995-1999 | 124.3 | 656     | 527,831    |
| 70-74 years | Male            | Other     | 2000-2004 | 102.4 | 679     | 662,821    |
| 70-74 years | Male            | Other     | 2005-2009 | 75.4  | 653     | 866,030    |
| 70-74 years | Male            | Other     | 2010-2016 | 65.5  | 1,137   | 1,735,486  |
| 70-74 years | Female          | All races | 1975-1979 | 57.9  | 10,658  | 18,407,463 |
| 70-74 years | Female          | All races | 1980-1984 | 93.6  | 19,376  | 20,704,598 |
| 70-74 years | Female          | All races | 1985-1989 | 130.5 | 29,042  | 22,247,793 |
| 70-74 years | Female          | All races | 1990-1994 | 154.6 | 37,170  | 24,038,560 |
| 70-74 years | Female          | All races | 1995-1999 | 173.1 | 43,330  | 25,032,939 |
| 70-74 years | Female          | All races | 2000-2004 | 183.2 | 44,416  | 24,245,687 |
| 70-74 years | Female          | All races | 2005-2009 | 180.0 | 43,317  | 24,065,117 |
| 70-74 years | Female          | All races | 2010-2016 | 174.3 | 69,592  | 39,935,323 |
| 70-74 years | Female          | White     | 1975-1979 | 61.2  | 10,240  | 16,726,724 |
| 70-74 years | Female          | White     | 1980-1984 | 99.3  | 18,571  | 18,700,272 |
| 70-74 years | Female          | White     | 1985-1989 | 138.4 | 27,682  | 19,998,426 |
| 70-74 years | Female          | White     | 1990-1994 | 163.7 | 35,208  | 21,511,042 |
| 70-74 years | Female          | White     | 1995-1999 | 183.5 | 40,704  | 22,184,690 |
| 70-74 years | Female          | White     | 2000-2004 | 197.9 | 41,717  | 21,082,124 |
| 70-74 years | Female          | White     | 2005-2009 | 196.9 | 40,455  | 20,544,459 |
| 70-74 years | Female          | White     | 2010-2016 | 191.2 | 64,577  | 33,781,144 |
| 70-74 years | Female          | Black     | 1975-1979 | 24.2  | 366     | 1,509,702  |
| 70-74 years | Female          | Black     | 1980-1984 | 41.8  | 733     | 1,754,443  |
| 70-74 years | Female          | Black     | 1985-1989 | 63.6  | 1,199   | 1,886,639  |
| 70-74 years | Female          | Black     | 1990-1994 | 84.1  | 1,703   | 2,023,965  |
| 70-74 years | Female          | Black     | 1995-1999 | 104.4 | 2,249   | 2,155,118  |
| 70-74 years | Female          | Black     | 2000-2004 | 98.9  | 2,250   | 2,276,093  |
| 70-74 years | Female          | Black     | 2005-2009 | 97.7  | 2,379   | 2,434,365  |
| 70-74 years | Female          | Black     | 2010-2016 | 102.2 | 4,139   | 4,049,221  |
| 70-74 years | Female          | Other     | 1975-1979 | 30.4  | 52      | 171,037    |
| 70-74 years | Female          | Other     | 1980-1984 | 28.8  | 72      | 249,883    |
| 70-74 years | Female          | Other     | 1985-1989 | 44.4  | 161     | 362,728    |
| 70-74 years | Female          | Other     | 1990-1994 | 51.4  | 259     | 503,553    |
| 70-74 years | Female          | Other     | 1995-1999 | 54.4  | 377     | 693,131    |
| 70-74 years | Female          | Other     | 2000-2004 | 50.6  | 449     | 887,470    |
| 70-74 years | Female          | Other     | 2005-2009 | 44.5  | 483     | 1,086,293  |
| 70-74 years | Female          | Other     | 2010-2016 | 41.6  | 876     | 2,104,958  |
| 75-79 years | Male and female | All races | 1975-1979 | 184.7 | 40,930  | 22,159,084 |
| 75-79 years | Male and female | All races | 1980-1984 | 228.7 | 58,303  | 25,497,161 |
| 75-79 years | Male and female | All races | 1985-1989 | 275.2 | 79,469  | 28,874,873 |
| 75-79 years | Male and female | All races | 1990-1994 | 300.0 | 95,716  | 31,908,470 |
| 75-79 years | Male and female | All races | 1995-1999 | 315.5 | 111,310 | 35,281,124 |

|             |                 |           |           |       |         |            |
|-------------|-----------------|-----------|-----------|-------|---------|------------|
| 75-79 years | Male and female | All races | 2000-2004 | 324.8 | 121,237 | 37,323,734 |
| 75-79 years | Male and female | All races | 2005-2009 | 316.5 | 116,939 | 36,951,813 |
| 75-79 years | Male and female | All races | 2010-2016 | 299.3 | 162,548 | 54,301,356 |
| 75-79 years | Male and female | White     | 1975-1979 | 193.3 | 39,002  | 20,173,020 |
| 75-79 years | Male and female | White     | 1980-1984 | 240.4 | 55,572  | 23,114,106 |
| 75-79 years | Male and female | White     | 1985-1989 | 287.5 | 75,095  | 26,121,954 |
| 75-79 years | Male and female | White     | 1990-1994 | 313.0 | 90,376  | 28,870,131 |
| 75-79 years | Male and female | White     | 1995-1999 | 328.7 | 104,440 | 31,773,008 |
| 75-79 years | Male and female | White     | 2000-2004 | 341.4 | 113,620 | 33,281,364 |
| 75-79 years | Male and female | White     | 2005-2009 | 336.2 | 109,214 | 32,480,098 |
| 75-79 years | Male and female | White     | 2010-2016 | 322.8 | 150,787 | 46,708,645 |
| 75-79 years | Male and female | Black     | 1975-1979 | 97.8  | 1,717   | 1,756,175  |
| 75-79 years | Male and female | Black     | 1980-1984 | 116.8 | 2,409   | 2,063,040  |
| 75-79 years | Male and female | Black     | 1985-1989 | 162.3 | 3,755   | 2,313,031  |
| 75-79 years | Male and female | Black     | 1990-1994 | 184.4 | 4,541   | 2,462,256  |
| 75-79 years | Male and female | Black     | 1995-1999 | 209.2 | 5,651   | 2,701,117  |
| 75-79 years | Male and female | Black     | 2000-2004 | 208.2 | 6,093   | 2,926,882  |
| 75-79 years | Male and female | Black     | 2005-2009 | 199.7 | 6,125   | 3,067,508  |
| 75-79 years | Male and female | Black     | 2010-2016 | 188.2 | 9,249   | 4,913,180  |
| 75-79 years | Male and female | Other     | 1975-1979 | 91.8  | 211     | 229,889    |
| 75-79 years | Male and female | Other     | 1980-1984 | 100.6 | 322     | 320,015    |
| 75-79 years | Male and female | Other     | 1985-1989 | 140.7 | 619     | 439,888    |
| 75-79 years | Male and female | Other     | 1990-1994 | 138.7 | 799     | 576,083    |
| 75-79 years | Male and female | Other     | 1995-1999 | 151.1 | 1,219   | 806,999    |
| 75-79 years | Male and female | Other     | 2000-2004 | 136.6 | 1,524   | 1,115,488  |
| 75-79 years | Male and female | Other     | 2005-2009 | 113.9 | 1,600   | 1,404,207  |
| 75-79 years | Male and female | Other     | 2010-2016 | 93.7  | 2,512   | 2,679,531  |
| 75-79 years | Male            | All races | 1975-1979 | 365.6 | 31,318  | 8,565,875  |
| 75-79 years | Male            | All races | 1980-1984 | 414.7 | 40,764  | 9,829,637  |
| 75-79 years | Male            | All races | 1985-1989 | 440.0 | 49,341  | 11,214,387 |
| 75-79 years | Male            | All races | 1990-1994 | 423.6 | 53,644  | 12,663,765 |
| 75-79 years | Male            | All races | 1995-1999 | 408.4 | 58,691  | 14,369,445 |
| 75-79 years | Male            | All races | 2000-2004 | 394.6 | 61,198  | 15,507,845 |
| 75-79 years | Male            | All races | 2005-2009 | 366.7 | 58,107  | 15,843,920 |
| 75-79 years | Male            | All races | 2010-2016 | 332.7 | 79,675  | 23,949,218 |
| 75-79 years | Male            | White     | 1975-1979 | 384.5 | 29,792  | 7,747,318  |
| 75-79 years | Male            | White     | 1980-1984 | 436.4 | 38,716  | 8,871,525  |
| 75-79 years | Male            | White     | 1985-1989 | 455.1 | 46,143  | 10,139,941 |
| 75-79 years | Male            | White     | 1990-1994 | 435.5 | 50,098  | 11,504,642 |
| 75-79 years | Male            | White     | 1995-1999 | 419.0 | 54,511  | 13,009,087 |
| 75-79 years | Male            | White     | 2000-2004 | 406.4 | 56,669  | 13,942,436 |
| 75-79 years | Male            | White     | 2005-2009 | 381.1 | 53,719  | 14,094,442 |
| 75-79 years | Male            | White     | 2010-2016 | 351.4 | 73,258  | 20,846,660 |

|             |        |           |           |       |        |            |
|-------------|--------|-----------|-----------|-------|--------|------------|
| 75-79 years | Male   | Black     | 1975-1979 | 194.6 | 1,379  | 708,805    |
| 75-79 years | Male   | Black     | 1980-1984 | 225.6 | 1,816  | 805,132    |
| 75-79 years | Male   | Black     | 1985-1989 | 312.6 | 2,728  | 872,574    |
| 75-79 years | Male   | Black     | 1990-1994 | 333.6 | 3,024  | 906,607    |
| 75-79 years | Male   | Black     | 1995-1999 | 336.7 | 3,415  | 1,014,349  |
| 75-79 years | Male   | Black     | 2000-2004 | 320.7 | 3,520  | 1,097,749  |
| 75-79 years | Male   | Black     | 2005-2009 | 295.5 | 3,444  | 1,165,666  |
| 75-79 years | Male   | Black     | 2010-2016 | 257.6 | 4,977  | 1,931,860  |
| 75-79 years | Male   | Other     | 1975-1979 | 133.9 | 147    | 109,752    |
| 75-79 years | Male   | Other     | 1980-1984 | 151.7 | 232    | 152,980    |
| 75-79 years | Male   | Other     | 1985-1989 | 232.8 | 470    | 201,872    |
| 75-79 years | Male   | Other     | 1990-1994 | 206.7 | 522    | 252,516    |
| 75-79 years | Male   | Other     | 1995-1999 | 221.1 | 765    | 346,009    |
| 75-79 years | Male   | Other     | 2000-2004 | 215.8 | 1,009  | 467,660    |
| 75-79 years | Male   | Other     | 2005-2009 | 161.7 | 944    | 583,812    |
| 75-79 years | Male   | Other     | 2010-2016 | 123.0 | 1,440  | 1,170,698  |
| 75-79 years | Female | All races | 1975-1979 | 70.7  | 9,612  | 13,593,209 |
| 75-79 years | Female | All races | 1980-1984 | 111.9 | 17,539 | 15,667,524 |
| 75-79 years | Female | All races | 1985-1989 | 170.6 | 30,128 | 17,660,486 |
| 75-79 years | Female | All races | 1990-1994 | 218.6 | 42,072 | 19,244,705 |
| 75-79 years | Female | All races | 1995-1999 | 251.6 | 52,619 | 20,911,679 |
| 75-79 years | Female | All races | 2000-2004 | 275.2 | 60,039 | 21,815,889 |
| 75-79 years | Female | All races | 2005-2009 | 278.7 | 58,832 | 21,107,893 |
| 75-79 years | Female | All races | 2010-2016 | 273.0 | 82,873 | 30,352,138 |
| 75-79 years | Female | White     | 1975-1979 | 74.1  | 9,210  | 12,425,702 |
| 75-79 years | Female | White     | 1980-1984 | 118.3 | 16,856 | 14,242,581 |
| 75-79 years | Female | White     | 1985-1989 | 181.2 | 28,952 | 15,982,013 |
| 75-79 years | Female | White     | 1990-1994 | 231.9 | 40,278 | 17,365,489 |
| 75-79 years | Female | White     | 1995-1999 | 266.1 | 49,929 | 18,763,921 |
| 75-79 years | Female | White     | 2000-2004 | 294.5 | 56,951 | 19,338,928 |
| 75-79 years | Female | White     | 2005-2009 | 301.8 | 55,495 | 18,385,656 |
| 75-79 years | Female | White     | 2010-2016 | 299.8 | 77,529 | 25,861,985 |
| 75-79 years | Female | Black     | 1975-1979 | 32.3  | 338    | 1,047,370  |
| 75-79 years | Female | Black     | 1980-1984 | 47.1  | 593    | 1,257,908  |
| 75-79 years | Female | Black     | 1985-1989 | 71.3  | 1,027  | 1,440,457  |
| 75-79 years | Female | Black     | 1990-1994 | 97.5  | 1,517  | 1,555,649  |
| 75-79 years | Female | Black     | 1995-1999 | 132.6 | 2,236  | 1,686,768  |
| 75-79 years | Female | Black     | 2000-2004 | 140.7 | 2,573  | 1,829,133  |
| 75-79 years | Female | Black     | 2005-2009 | 141.0 | 2,681  | 1,901,842  |
| 75-79 years | Female | Black     | 2010-2016 | 143.3 | 4,272  | 2,981,320  |
| 75-79 years | Female | Other     | 1975-1979 | 53.3  | 64     | 120,137    |
| 75-79 years | Female | Other     | 1980-1984 | 53.9  | 90     | 167,035    |
| 75-79 years | Female | Other     | 1985-1989 | 62.6  | 149    | 238,016    |

|             |                 |           |           |       |         |            |
|-------------|-----------------|-----------|-----------|-------|---------|------------|
| 75-79 years | Female          | Other     | 1990-1994 | 85.6  | 277     | 323,567    |
| 75-79 years | Female          | Other     | 1995-1999 | 98.5  | 454     | 460,990    |
| 75-79 years | Female          | Other     | 2000-2004 | 79.5  | 515     | 647,828    |
| 75-79 years | Female          | Other     | 2005-2009 | 80.0  | 656     | 820,395    |
| 75-79 years | Female          | Other     | 2010-2016 | 71.0  | 1,072   | 1,508,833  |
| 80-84 years | Male and female | All races | 1975-1979 | 208.1 | 29,296  | 14,077,436 |
| 80-84 years | Male and female | All races | 1980-1984 | 271.2 | 42,201  | 15,558,897 |
| 80-84 years | Male and female | All races | 1985-1989 | 341.1 | 61,350  | 17,984,192 |
| 80-84 years | Male and female | All races | 1990-1994 | 391.2 | 81,376  | 20,802,725 |
| 80-84 years | Male and female | All races | 1995-1999 | 439.2 | 103,296 | 23,518,541 |
| 80-84 years | Male and female | All races | 2000-2004 | 456.8 | 120,342 | 26,344,248 |
| 80-84 years | Male and female | All races | 2005-2009 | 456.1 | 129,562 | 28,404,456 |
| 80-84 years | Male and female | All races | 2010-2016 | 443.9 | 179,811 | 40,507,396 |
| 80-84 years | Male and female | White     | 1975-1979 | 216.2 | 28,132  | 13,013,528 |
| 80-84 years | Male and female | White     | 1980-1984 | 281.3 | 40,224  | 14,297,641 |
| 80-84 years | Male and female | White     | 1985-1989 | 354.2 | 58,224  | 16,436,226 |
| 80-84 years | Male and female | White     | 1990-1994 | 406.3 | 77,026  | 18,955,931 |
| 80-84 years | Male and female | White     | 1995-1999 | 457.2 | 97,766  | 21,383,995 |
| 80-84 years | Male and female | White     | 2000-2004 | 478.0 | 113,732 | 23,792,274 |
| 80-84 years | Male and female | White     | 2005-2009 | 479.5 | 121,802 | 25,401,652 |
| 80-84 years | Male and female | White     | 2010-2016 | 473.2 | 167,801 | 35,462,818 |
| 80-84 years | Male and female | Black     | 1975-1979 | 108.5 | 1,015   | 935,449    |
| 80-84 years | Male and female | Black     | 1980-1984 | 155.3 | 1,696   | 1,091,914  |
| 80-84 years | Male and female | Black     | 1985-1989 | 203.6 | 2,679   | 1,315,635  |
| 80-84 years | Male and female | Black     | 1990-1994 | 235.4 | 3,596   | 1,527,757  |
| 80-84 years | Male and female | Black     | 1995-1999 | 265.6 | 4,460   | 1,678,960  |
| 80-84 years | Male and female | Black     | 2000-2004 | 276.6 | 5,201   | 1,880,512  |
| 80-84 years | Male and female | Black     | 2005-2009 | 278.2 | 5,812   | 2,088,771  |
| 80-84 years | Male and female | Black     | 2010-2016 | 269.7 | 8,846   | 3,280,188  |
| 80-84 years | Male and female | Other     | 1975-1979 | 116.0 | 149     | 128,459    |
| 80-84 years | Male and female | Other     | 1980-1984 | 165.9 | 281     | 169,342    |
| 80-84 years | Male and female | Other     | 1985-1989 | 192.4 | 447     | 232,331    |
| 80-84 years | Male and female | Other     | 1990-1994 | 236.3 | 754     | 319,037    |
| 80-84 years | Male and female | Other     | 1995-1999 | 234.9 | 1,070   | 455,586    |
| 80-84 years | Male and female | Other     | 2000-2004 | 209.8 | 1,409   | 671,462    |
| 80-84 years | Male and female | Other     | 2005-2009 | 213.1 | 1,948   | 914,033    |
| 80-84 years | Male and female | Other     | 2010-2016 | 179.3 | 3,164   | 1,764,390  |
| 80-84 years | Male            | All races | 1975-1979 | 447.3 | 22,238  | 4,971,599  |
| 80-84 years | Male            | All races | 1980-1984 | 535.7 | 28,824  | 5,380,912  |
| 80-84 years | Male            | All races | 1985-1989 | 609.5 | 37,788  | 6,199,757  |
| 80-84 years | Male            | All races | 1990-1994 | 620.0 | 45,126  | 7,278,895  |
| 80-84 years | Male            | All races | 1995-1999 | 615.4 | 52,574  | 8,542,529  |
| 80-84 years | Male            | All races | 2000-2004 | 583.2 | 57,981  | 9,941,137  |

|             |        |           |           |       |        |            |
|-------------|--------|-----------|-----------|-------|--------|------------|
| 80-84 years | Male   | All races | 2005-2009 | 558.1 | 61,860 | 11,084,255 |
| 80-84 years | Male   | All races | 2010-2016 | 510.4 | 84,789 | 16,612,455 |
| 80-84 years | Male   | White     | 1975-1979 | 467.7 | 21,330 | 4,560,585  |
| 80-84 years | Male   | White     | 1980-1984 | 557.2 | 27,358 | 4,909,578  |
| 80-84 years | Male   | White     | 1985-1989 | 632.1 | 35,624 | 5,635,751  |
| 80-84 years | Male   | White     | 1990-1994 | 638.0 | 42,267 | 6,625,047  |
| 80-84 years | Male   | White     | 1995-1999 | 630.5 | 49,191 | 7,801,394  |
| 80-84 years | Male   | White     | 2000-2004 | 599.9 | 54,181 | 9,031,157  |
| 80-84 years | Male   | White     | 2005-2009 | 575.9 | 57,620 | 10,004,406 |
| 80-84 years | Male   | White     | 2010-2016 | 533.4 | 78,583 | 14,731,555 |
| 80-84 years | Male   | Black     | 1975-1979 | 224.8 | 800    | 355,947    |
| 80-84 years | Male   | Black     | 1980-1984 | 314.4 | 1,253  | 398,591    |
| 80-84 years | Male   | Black     | 1985-1989 | 400.8 | 1,842  | 459,562    |
| 80-84 years | Male   | Black     | 1990-1994 | 460.5 | 2,359  | 512,246    |
| 80-84 years | Male   | Black     | 1995-1999 | 491.8 | 2,707  | 550,425    |
| 80-84 years | Male   | Black     | 2000-2004 | 459.7 | 2,927  | 636,666    |
| 80-84 years | Male   | Black     | 2005-2009 | 433.7 | 3,105  | 715,943    |
| 80-84 years | Male   | Black     | 2010-2016 | 373.4 | 4,354  | 1,166,195  |
| 80-84 years | Male   | Other     | 1975-1979 | 196.1 | 108    | 55,067     |
| 80-84 years | Male   | Other     | 1980-1984 | 292.8 | 213    | 72,743     |
| 80-84 years | Male   | Other     | 1985-1989 | 308.3 | 322    | 104,444    |
| 80-84 years | Male   | Other     | 1990-1994 | 353.1 | 500    | 141,602    |
| 80-84 years | Male   | Other     | 1995-1999 | 354.5 | 676    | 190,710    |
| 80-84 years | Male   | Other     | 2000-2004 | 319.4 | 873    | 273,314    |
| 80-84 years | Male   | Other     | 2005-2009 | 311.9 | 1,135  | 363,906    |
| 80-84 years | Male   | Other     | 2010-2016 | 259.1 | 1,852  | 714,705    |
| 80-84 years | Female | All races | 1975-1979 | 77.5  | 7,058  | 9,105,837  |
| 80-84 years | Female | All races | 1980-1984 | 131.4 | 13,377 | 10,177,985 |
| 80-84 years | Female | All races | 1985-1989 | 199.9 | 23,562 | 11,784,435 |
| 80-84 years | Female | All races | 1990-1994 | 268.0 | 36,250 | 13,523,830 |
| 80-84 years | Female | All races | 1995-1999 | 338.7 | 50,722 | 14,976,012 |
| 80-84 years | Female | All races | 2000-2004 | 380.2 | 62,361 | 16,403,111 |
| 80-84 years | Female | All races | 2005-2009 | 390.9 | 67,702 | 17,320,201 |
| 80-84 years | Female | All races | 2010-2016 | 397.7 | 95,022 | 23,894,941 |
| 80-84 years | Female | White     | 1975-1979 | 80.5  | 6,802  | 8,452,943  |
| 80-84 years | Female | White     | 1980-1984 | 137.0 | 12,866 | 9,388,063  |
| 80-84 years | Female | White     | 1985-1989 | 209.3 | 22,600 | 10,800,475 |
| 80-84 years | Female | White     | 1990-1994 | 281.9 | 34,759 | 12,330,884 |
| 80-84 years | Female | White     | 1995-1999 | 357.6 | 48,575 | 13,582,601 |
| 80-84 years | Female | White     | 2000-2004 | 403.4 | 59,551 | 14,761,117 |
| 80-84 years | Female | White     | 2005-2009 | 416.8 | 64,182 | 15,397,246 |
| 80-84 years | Female | White     | 2010-2016 | 430.4 | 89,218 | 20,731,263 |
| 80-84 years | Female | Black     | 1975-1979 | 37.1  | 215    | 579,502    |



|             |                 |           |           |       |         |            |
|-------------|-----------------|-----------|-----------|-------|---------|------------|
| 80-84 years | Female          | Black     | 1980-1984 | 63.9  | 443     | 693,323    |
| 80-84 years | Female          | Black     | 1985-1989 | 97.8  | 837     | 856,073    |
| 80-84 years | Female          | Black     | 1990-1994 | 121.8 | 1,237   | 1,015,511  |
| 80-84 years | Female          | Black     | 1995-1999 | 155.3 | 1,753   | 1,128,535  |
| 80-84 years | Female          | Black     | 2000-2004 | 182.8 | 2,274   | 1,243,846  |
| 80-84 years | Female          | Black     | 2005-2009 | 197.2 | 2,707   | 1,372,828  |
| 80-84 years | Female          | Black     | 2010-2016 | 212.5 | 4,492   | 2,113,993  |
| 80-84 years | Female          | Other     | 1975-1979 | 55.9  | 41      | 73,392     |
| 80-84 years | Female          | Other     | 1980-1984 | 70.4  | 68      | 96,599     |
| 80-84 years | Female          | Other     | 1985-1989 | 97.7  | 125     | 127,887    |
| 80-84 years | Female          | Other     | 1990-1994 | 143.2 | 254     | 177,435    |
| 80-84 years | Female          | Other     | 1995-1999 | 148.7 | 394     | 264,876    |
| 80-84 years | Female          | Other     | 2000-2004 | 134.6 | 536     | 398,148    |
| 80-84 years | Female          | Other     | 2005-2009 | 147.8 | 813     | 550,127    |
| 80-84 years | Female          | Other     | 2010-2016 | 125.0 | 1,312   | 1,049,685  |
| 85+ years   | Male and female | All races | 1975-1979 | 215.6 | 21,396  | 9,922,337  |
| 85+ years   | Male and female | All races | 1980-1984 | 295.9 | 36,011  | 12,170,858 |
| 85+ years   | Male and female | All races | 1985-1989 | 387.1 | 54,522  | 14,086,125 |
| 85+ years   | Male and female | All races | 1990-1994 | 464.8 | 77,024  | 16,569,997 |
| 85+ years   | Male and female | All races | 1995-1999 | 568.1 | 111,157 | 19,567,643 |
| 85+ years   | Male and female | All races | 2000-2004 | 657.4 | 144,344 | 21,955,833 |
| 85+ years   | Male and female | All races | 2005-2009 | 679.0 | 170,844 | 25,161,914 |
| 85+ years   | Male and female | All races | 2010-2016 | 690.2 | 289,559 | 41,952,277 |
| 85+ years   | Male and female | White     | 1975-1979 | 223.7 | 20,413  | 9,126,999  |
| 85+ years   | Male and female | White     | 1980-1984 | 308.1 | 34,434  | 11,174,675 |
| 85+ years   | Male and female | White     | 1985-1989 | 402.4 | 51,854  | 12,885,857 |
| 85+ years   | Male and female | White     | 1990-1994 | 483.0 | 72,987  | 15,111,624 |
| 85+ years   | Male and female | White     | 1995-1999 | 590.4 | 104,890 | 17,764,872 |
| 85+ years   | Male and female | White     | 2000-2004 | 684.8 | 136,251 | 19,896,570 |
| 85+ years   | Male and female | White     | 2005-2009 | 708.6 | 160,876 | 22,703,838 |
| 85+ years   | Male and female | White     | 2010-2016 | 728.4 | 271,152 | 37,225,527 |
| 85+ years   | Male and female | Black     | 1975-1979 | 113.3 | 796     | 702,724    |
| 85+ years   | Male and female | Black     | 1980-1984 | 147.4 | 1,294   | 878,006    |
| 85+ years   | Male and female | Black     | 1985-1989 | 210.5 | 2,183   | 1,036,930  |
| 85+ years   | Male and female | Black     | 1990-1994 | 265.8 | 3,287   | 1,236,843  |
| 85+ years   | Male and female | Black     | 1995-1999 | 336.0 | 4,974   | 1,480,243  |
| 85+ years   | Male and female | Black     | 2000-2004 | 383.5 | 6,053   | 1,578,531  |
| 85+ years   | Male and female | Black     | 2005-2009 | 406.8 | 7,171   | 1,762,654  |
| 85+ years   | Male and female | Black     | 2010-2016 | 399.9 | 12,525  | 3,132,407  |
| 85+ years   | Male and female | Other     | 1975-1979 | 201.9 | 187     | 92,614     |
| 85+ years   | Male and female | Other     | 1980-1984 | 239.5 | 283     | 118,177    |
| 85+ years   | Male and female | Other     | 1985-1989 | 296.9 | 485     | 163,338    |
| 85+ years   | Male and female | Other     | 1990-1994 | 338.6 | 750     | 221,530    |

|           |                 |           |           |       |         |            |
|-----------|-----------------|-----------|-----------|-------|---------|------------|
| 85+ years | Male and female | Other     | 1995-1999 | 400.9 | 1,293   | 322,528    |
| 85+ years | Male and female | Other     | 2000-2004 | 424.4 | 2,040   | 480,732    |
| 85+ years | Male and female | Other     | 2005-2009 | 402.2 | 2,797   | 695,422    |
| 85+ years | Male and female | Other     | 2010-2016 | 368.9 | 5,882   | 1,594,343  |
| 85+ years | Male            | All races | 1975-1979 | 472.8 | 14,720  | 3,113,247  |
| 85+ years | Male            | All races | 1980-1984 | 629.7 | 22,574  | 3,584,840  |
| 85+ years | Male            | All races | 1985-1989 | 768.5 | 30,588  | 3,979,982  |
| 85+ years | Male            | All races | 1990-1994 | 842.6 | 38,658  | 4,587,826  |
| 85+ years | Male            | All races | 1995-1999 | 919.2 | 50,773  | 5,523,831  |
| 85+ years | Male            | All races | 2000-2004 | 937.1 | 60,967  | 6,505,837  |
| 85+ years | Male            | All races | 2005-2009 | 883.9 | 70,304  | 7,953,631  |
| 85+ years | Male            | All races | 2010-2016 | 838.3 | 119,033 | 14,199,029 |
| 85+ years | Male            | White     | 1975-1979 | 493.9 | 13,995  | 2,833,405  |
| 85+ years | Male            | White     | 1980-1984 | 661.7 | 21,520  | 3,252,319  |
| 85+ years | Male            | White     | 1985-1989 | 803.7 | 28,886  | 3,594,312  |
| 85+ years | Male            | White     | 1990-1994 | 875.8 | 36,292  | 4,143,993  |
| 85+ years | Male            | White     | 1995-1999 | 950.2 | 47,422  | 4,990,737  |
| 85+ years | Male            | White     | 2000-2004 | 962.9 | 56,856  | 5,904,774  |
| 85+ years | Male            | White     | 2005-2009 | 908.7 | 65,566  | 7,215,155  |
| 85+ years | Male            | White     | 2010-2016 | 869.0 | 110,407 | 12,704,745 |
| 85+ years | Male            | Black     | 1975-1979 | 239.2 | 575     | 240,374    |
| 85+ years | Male            | Black     | 1980-1984 | 299.5 | 861     | 287,437    |
| 85+ years | Male            | Black     | 1985-1989 | 432.6 | 1,386   | 320,352    |
| 85+ years | Male            | Black     | 1990-1994 | 534.0 | 1,899   | 355,648    |
| 85+ years | Male            | Black     | 1995-1999 | 633.5 | 2,583   | 407,764    |
| 85+ years | Male            | Black     | 2000-2004 | 697.2 | 2,942   | 421,995    |
| 85+ years | Male            | Black     | 2005-2009 | 662.6 | 3,203   | 483,363    |
| 85+ years | Male            | Black     | 2010-2016 | 598.3 | 5,454   | 911,560    |
| 85+ years | Male            | Other     | 1975-1979 | 380.1 | 150     | 39,468     |
| 85+ years | Male            | Other     | 1980-1984 | 428.1 | 193     | 45,084     |
| 85+ years | Male            | Other     | 1985-1989 | 483.8 | 316     | 65,318     |
| 85+ years | Male            | Other     | 1990-1994 | 529.6 | 467     | 88,185     |
| 85+ years | Male            | Other     | 1995-1999 | 612.8 | 768     | 125,330    |
| 85+ years | Male            | Other     | 2000-2004 | 652.8 | 1,169   | 179,068    |
| 85+ years | Male            | Other     | 2005-2009 | 601.7 | 1,535   | 255,113    |
| 85+ years | Male            | Other     | 2010-2016 | 544.3 | 3,172   | 582,724    |
| 85+ years | Female          | All races | 1975-1979 | 98.0  | 6,676   | 6,809,090  |
| 85+ years | Female          | All races | 1980-1984 | 156.5 | 13,437  | 8,586,018  |
| 85+ years | Female          | All races | 1985-1989 | 236.8 | 23,934  | 10,106,143 |
| 85+ years | Female          | All races | 1990-1994 | 320.2 | 38,366  | 11,982,171 |
| 85+ years | Female          | All races | 1995-1999 | 430.0 | 60,384  | 14,043,812 |
| 85+ years | Female          | All races | 2000-2004 | 539.7 | 83,377  | 15,449,996 |
| 85+ years | Female          | All races | 2005-2009 | 584.3 | 100,540 | 17,208,283 |

|           |        |           |           |       |         |            |
|-----------|--------|-----------|-----------|-------|---------|------------|
| 85+ years | Female | All races | 2010-2016 | 614.4 | 170,526 | 27,753,248 |
| 85+ years | Female | White     | 1975-1979 | 102.0 | 6,418   | 6,293,594  |
| 85+ years | Female | White     | 1980-1984 | 163.0 | 12,914  | 7,922,356  |
| 85+ years | Female | White     | 1985-1989 | 247.2 | 22,968  | 9,291,545  |
| 85+ years | Female | White     | 1990-1994 | 334.6 | 36,695  | 10,967,631 |
| 85+ years | Female | White     | 1995-1999 | 449.9 | 57,468  | 12,774,135 |
| 85+ years | Female | White     | 2000-2004 | 567.4 | 79,395  | 13,991,796 |
| 85+ years | Female | White     | 2005-2009 | 615.4 | 95,310  | 15,488,683 |
| 85+ years | Female | White     | 2010-2016 | 655.5 | 160,745 | 24,520,782 |
| 85+ years | Female | Black     | 1975-1979 | 47.8  | 221     | 462,350    |
| 85+ years | Female | Black     | 1980-1984 | 73.3  | 433     | 590,569    |
| 85+ years | Female | Black     | 1985-1989 | 111.2 | 797     | 716,578    |
| 85+ years | Female | Black     | 1990-1994 | 157.5 | 1,388   | 881,195    |
| 85+ years | Female | Black     | 1995-1999 | 222.9 | 2,391   | 1,072,479  |
| 85+ years | Female | Black     | 2000-2004 | 269.0 | 3,111   | 1,156,536  |
| 85+ years | Female | Black     | 2005-2009 | 310.2 | 3,968   | 1,279,291  |
| 85+ years | Female | Black     | 2010-2016 | 318.4 | 7,071   | 2,220,847  |
| 85+ years | Female | Other     | 1975-1979 | 69.6  | 37      | 53,146     |
| 85+ years | Female | Other     | 1980-1984 | 123.1 | 90      | 73,093     |
| 85+ years | Female | Other     | 1985-1989 | 172.4 | 169     | 98,020     |
| 85+ years | Female | Other     | 1990-1994 | 212.2 | 283     | 133,345    |
| 85+ years | Female | Other     | 1995-1999 | 266.2 | 525     | 197,198    |
| 85+ years | Female | Other     | 2000-2004 | 288.7 | 871     | 301,664    |
| 85+ years | Female | Other     | 2005-2009 | 286.6 | 1,262   | 440,309    |
| 85+ years | Female | Other     | 2010-2016 | 267.9 | 2,710   | 1,011,619  |
